# Supplementary material for: Apical annuli are specialised sites of post-invasion secretion of dense granules in Toxoplasma
Source: bioRxiv preprint, doi:10.1101/2023.07.26.550681, version 2 (2023-11-05)
Supplement: Table S1 [file 550681_file06.xlsx]

## Sheet: BioID_significant_changes
ToxoDB Accession nb.	logFC	CI.L	CI.R	AveExpr	t	P.Value	adj.P.Val	B
linker_HA_BirA	5.50703	4.8245	6.18956	18.6965	13.8037	7.13e-08	4.41e-06	8.53873
TGME49_230340 (AAP4)	5.27516	4.85684	5.69347	22.4032	23.35	1.07e-10	1.92e-08	15.2011
TGME49_313480 (AAP3)	5.12973	4.98522	5.27424	20.7286	26.3778	9.09e-12	2.43e-09	17.6191
TGME49_248640	4.7908	4.60053	4.98108	19.6788	57.9095	2.36e-16	1.9e-13	27.2708
TGME49_295850 (AAP2)	4.59071	4.45432	4.72709	13.8585	9.91725	8.9e-07	2.75e-05	5.72918
TGME49_222200 (LMBD3)	4.30559	4.15579	4.45539	18.3591	8.12372	1.39e-05	0.000271851	2.96197
TGME49_319900 (AAP5)	4.30143	4.15354	4.44931	19.4924	34.2954	1.42e-13	5.7e-11	21.6598
TGME49_316730	3.95726	3.77029	4.14422	13.7917	13.0988	1.77e-08	1.42e-06	9.74012
TGME49_209420	3.58125	3.39696	3.76554	14.2298	14.202	5.57e-09	6.09e-07	10.9266
TGME49_232340	3.14675	2.72172	3.57179	18.4401	12.1663	8.5e-08	4.72e-06	8.18727
TGME49_202540	3.05407	2.90613	3.202	14.4079	19.6309	1.19e-10	1.92e-08	14.9319
TGME49_231370	2.99978	2.68564	3.31391	15.6927	10.8693	1.95e-07	7.85e-06	7.24803
TGME49_242780	2.93334	2.53596	3.33073	15.9662	14.1005	6.06e-09	6.09e-07	10.8373
TGME49_260540	2.17423	1.73622	2.61225	20.9608	5.50321	0.000277375	0.00259314	-0.29408
TGME49_222660	2.09694	1.70062	2.49326	15.5953	11.606	5.53e-08	3.71e-06	8.50248
TGME49_230850	1.87017	1.52689	2.21345	19.2755	6.33254	6.17e-05	0.000935463	1.21684
TGME49_209800	1.84484	1.62881	2.06087	13.9513	9.27079	6.71e-07	2.17e-05	5.86139
TGME49_243250	1.52622	1.36668	1.68576	20.195	15.8355	1.52e-09	2.04e-07	12.2839
TGME49_224540	1.32218	0.838932	1.80543	15.272	5.26071	0.000199378	0.00210921	-0.12732
TGME49_217890	1.23581	1.03574	1.43588	17.925	4.08824	0.00187284	0.00672216	-2.38397
TGME49_257300	1.21186	1.04481	1.37892	15.4123	9.26507	6.75e-07	2.17e-05	5.85429
TGME49_308860	1.20384	0.895684	1.51199	21.0684	4.30301	0.00132081	0.00550371	-2.01748
TGME49_301420	1.17685	0.746219	1.60748	15.4654	8.96538	9.64e-07	2.87e-05	5.47777
TGME49_250820	1.15797	0.275551	2.04038	19.8765	4.16045	0.0016653	0.00628592	-2.26064
TGME49_272600	1.14762	0.757236	1.53801	19.5381	4.42303	0.00103839	0.00488227	-1.77936
TGME49_245640	1.11764	0.809604	1.42568	20.7906	13.467	1.01e-08	9e-07	10.2997
TGME49_227860	1.09097	0.72924	1.4527	14.6753	4.09447	0.00148039	0.00583448	-2.21198
TGME49_288750	1.08933	0.92715	1.2515	18.0699	7.63494	5.24e-06	0.000123907	3.68546
TGME49_274120	1.08779	0.847071	1.32851	17.2044	11.1373	8.81e-08	4.72e-06	8.01026
TGME49_221940	1.08286	0.968331	1.19739	18.8681	4.83074	0.000490951	0.00322309	-1.01892
TGME49_266630	1.07772	0.889242	1.2662	18.1728	10.5314	1.65e-07	7.37e-06	7.34715
TGME49_278780	1.06538	0.874986	1.25578	19.9719	10.7048	1.37e-07	6.91e-06	7.54015
TGME49_257470	1.05064	0.767974	1.33331	16.44	5.84947	7.14e-05	0.000972379	0.931629
TGME49_223790	1.04751	-0.305812	2.40083	18.8825	9.43848	5.52e-07	1.93e-05	6.06792
TGME49_266080	1.04609	-0.0234099	2.11559	16.09	8.53716	1.63e-06	4.51e-05	4.92302
TGME49_297520	1.04597	0.565845	1.5261	20.2814	5.83632	7.94e-05	0.00104608	0.839583
TGME49_291880	1.03505	0.710189	1.35991	18.1033	10.5415	1.63e-07	7.37e-06	7.35851
TGME49_218610	1.02307	-0.337224	2.38336	15.1443	6.20442	4.1e-05	0.000717334	1.51318
TGME49_227000	1.00848	0.866823	1.15013	19.7679	11.6277	5.42e-08	3.71e-06	8.52484
TGME49_209260	1.00844	0.805154	1.21173	20.924	6.07273	5.51e-05	0.000853611	1.22366
TGME49_313780	1.00784	0.390229	1.62546	16.5846	8.38851	1.96e-06	5.25e-05	4.72566
TGME49_234230	1.00776	0.776266	1.23926	12.7156	3.73497	0.00273886	0.0088356	-2.85565
TGME49_298630	1.00411	0.764843	1.24338	13.5398	5.3869	0.000150643	0.00165914	0.148097
TGME49_258090	1.00374	0.59337	1.41412	21.2125	10.3721	1.95e-07	7.85e-06	7.16765

## Sheet: Normalised_TMT_intensity_values
ToxoDB_accession nb.	RUN1_LMBD3-BirA*	RUN1_Parental1	RUN1_Parental2	RUN1_Parental3	RUN2_LMBD3-BirA*	RUN2_Parental1	RUN2_Parental2	RUN2_Parental3	RUN3_LMBD3-BirA*	RUN3_Parental1	RUN3_Parental2	RUN3_Parental3	HyperLOPIT_tagm.map.allocation.prediction
TGME49_221320	1.9616e+08	2.10624e+08	2.17907e+08	2.09125e+08	2.00707e+08	2.1788e+08	2.1837e+08	2.1515e+08	1.91056e+08	2.0693e+08	2.16844e+08	2.09832e+08	apicoplast
TGME49_284190	1.24962e+08	110498115	1.03215e+08	1.11997e+08	1.20415e+08	1.03242e+08	1.02753e+08	1.05972e+08	130066588	114192510	104278511	111290618	mitochondrion - soluble
TGME49_218560	1.34803e+07	1.25573e+07	1.32965e+07	1.20863e+07	1.75971e+07	1.78137e+07	2.14016e+07	16496865	1.38215e+07	1.50018e+07	1.83324e+07	1.64537e+07	NA
TGME49_311230	6.5205e+06	2.76721e+06	4.91667e+06	4.14003e+06	8.62104e+06	3.78154e+06	2.42322e+06	5.06195e+06	8.98528e+06	5.39989e+06	5.13043e+06	6.37625e+06	unknown
TGME49_297520	1.77322e+06	716964	1.00591e+06	1.00131e+06	3.55447e+06	1.01677e+06	1.17925e+06	1.516e+06	1.67835e+06	1.13599e+06	917105	1.26911e+06	unknown
TGME49_262150	549917	340205	474194	564697	2.30794e+06	909441	827124	1.19894e+06	1.34576e+06	1.00216e+06	972049	1.13248e+06	unknown
TGME49_251780	1.66943e+07	1.17498e+07	8.27792e+06	1.12165e+07	3.4721e+07	1.70112e+07	9.45468e+06	2.24073e+07	1.921e+07	1.26939e+07	9.04363e+06	1.47766e+07	mitochondrion - soluble
TGME49_272600	1.04285e+06	446412	845594	410923	2.22491e+06	574476	540971	892769	1.13876e+06	707317	564207	835183	unknown
TGME49_230340	5.70286e+07	1.79934e+06	3.72735e+06	2.00232e+06	1.03923e+08	1.95411e+06	2.19763e+06	2.13949e+06	1.07705e+08	2.14361e+06	2.23146e+06	2.25059e+06	apical 1
TGME49_231640	1.05109e+07	4.78713e+06	2.86987e+07	4.97514e+06	1.256e+07	5.43445e+06	4.31164e+06	6.93433e+06	1.07465e+07	6.09601e+06	1.08898e+07	8.71855e+06	IMC
TGME49_244200	2.38745e+07	2.01559e+07	1.93262e+07	1.79296e+07	2.25677e+07	2.05955e+07	1.35865e+07	1.9002e+07	2.24155e+07	1.79268e+07	1.77705e+07	2.00883e+07	mitochondrion - soluble
TGME49_202220	676287	493786	435589	427961	1.18548e+06	620331	625343	689929	591906	352344	257821	376766	unknown
TGME49_266960	3.15458e+06	1.35131e+06	2.53959e+06	1.4027e+06	4.3752e+06	2.03111e+06	2.45838e+06	2.48108e+06	2.15762e+06	1.26362e+06	1.45108e+06	1.4372e+06	tubulin cytoskeleton
TGME49_270690	307963	480620	353453	512677	54143	37198.5	36988.6	48063.3	12144.9	8979.81	8150.64	10467.3	unknown
TGME49_289690	1.41472e+07	1.27025e+07	4.95672e+06	1.03951e+07	2.73472e+07	1.85658e+07	1.81254e+07	1.49973e+07	1.81782e+07	1.37382e+07	5.5998e+06	1.23247e+07	cytosol
TGME49_244560	2.41893e+07	1.99655e+07	2.20467e+07	2.21094e+07	2.84294e+07	2.39641e+07	2.43517e+07	2.68805e+07	2.84328e+07	2.92375e+07	2.8312e+07	2.49551e+07	ER 2
TGME49_294800	4.29528e+07	3.51333e+07	3.8123e+07	3.6809e+07	6.99719e+07	5.22629e+07	5.29785e+07	5.60782e+07	4.55607e+07	4.00643e+07	4.0722e+07	3.77793e+07	unknown
TGME49_311720	1.90597e+07	1.55118e+07	1.82386e+07	1.88965e+07	2.75401e+07	2.16517e+07	2.37215e+07	2.84412e+07	1.56944e+07	1.61492e+07	1.644e+07	1.48472e+07	ER 2
TGME49_221620	1.24139e+07	5.19648e+06	1.17815e+07	5.87893e+06	1.63151e+07	8.60664e+06	8.37957e+06	9.9036e+06	1.74413e+07	1.01252e+07	1.3164e+07	1.14798e+07	tubulin cytoskeleton
TGME49_269885	8.22304e+06	5.68568e+06	6.58735e+06	5.97629e+06	9.00951e+06	7.33644e+06	6.38217e+06	7.6011e+06	7.59882e+06	6.44279e+06	8.26234e+06	7.17535e+06	rhoptries 2
TGME49_288380	8.38257e+06	7.12331e+06	7.80699e+06	7.44045e+06	1.1409e+07	9.3363e+06	1.06274e+07	9.72144e+06	1.23251e+07	1.22233e+07	1.1887e+07	1.07278e+07	cytosol
TGME49_292920	16220919	1.09879e+07	8.0801e+06	1.03971e+07	1.49263e+07	9.3461e+06	5.4137e+06	1.0556e+07	1.54317e+07	1.14745e+07	8.66547e+06	1.22604e+07	mitochondrion - soluble
TGME49_278870	4.90831e+06	2.92199e+06	3.71587e+06	3.33626e+06	3.77393e+06	2.31368e+06	2.40518e+06	2.95283e+06	4.26327e+06	3.73662e+06	3.58871e+06	3.35726e+06	unknown
TGME49_316400	1.59333e+07	5.96359e+06	1.49074e+07	6.81883e+06	2.194e+07	9.67805e+06	1.01465e+07	1.11538e+07	2.16734e+07	1.04163e+07	1.4957e+07	1.27468e+07	tubulin cytoskeleton
TGME49_273760	8.90803e+06	6.82554e+06	6.5991e+06	6.41698e+06	8.1664e+06	6.79496e+06	6.86821e+06	6.90026e+06	9.95293e+06	8.70392e+06	8.18755e+06	7.78431e+06	cytosol
TGME49_223920	7.24882e+06	5.68189e+06	6.84348e+06	6.4962e+06	8.0363e+06	7.13161e+06	7.27227e+06	7.81001e+06	6.88968e+06	7.58753e+06	7.61953e+06	6.87594e+06	rhoptries 1
TGME49_215100	4.65202e+06	3.73255e+06	2.94265e+06	3.45216e+06	4.82653e+06	4.25064e+06	4.00316e+06	4.44734e+06	3.98785e+06	3.46788e+06	4.36197e+06	3.70779e+06	apicoplast
linker_HA_BirA	4.60614e+06	196993	129322	283597	7.83004e+06	266039	188993	297762	1.14154e+07	71954.7	92252.4	116849	NA
TGME49_290950	5.63274e+06	4.24728e+06	4.7273e+06	4.60562e+06	5.08719e+06	4.09807e+06	4.32639e+06	4.70508e+06	5.1916e+06	4.8752e+06	4.95206e+06	4.4587e+06	cytosol
TGME49_272000	453442	293481	302858	383174	918726	317533	276514	530289	617224	554579	392989	485397	unknown
TGME49_313480	2.68064e+07	721613	1.55219e+06	806227	2.97427e+07	670283	779510	798481	1.96187e+07	478579	553995	484767	apical 2
TGME49_221940	938724	403396	449914	544029	1.19535e+06	277334	325031	546630	528439	385704	331187	390752	nucleus - chromatin
TGME49_291180	1.94529e+06	1.33694e+06	1.35052e+06	1.54429e+06	645504	506001	530138	599572	614500	527866	574816	529503	unknown
TGME49_248640	6.81057e+06	265200	267358	282034	1.28137e+07	426519	374192	407422	1.19049e+07	455013	428979	463093	PM - peripheral 2
TGME49_208842	3.25688e+06	2.93862e+06	2.31416e+06	2.58883e+06	4.73807e+06	4.21044e+06	3.59127e+06	4.94919e+06	5.99024e+06	5.42529e+06	6.56062e+06	5.78451e+06	apicoplast
TGME49_227800	245793	216505	290069	255570	668348	334872	185013	278626	347306	312084	291777	263315	nucleus - chromatin
TGME49_262380	1.0206e+07	7.23223e+06	5.72492e+06	7.85377e+06	1.17252e+07	6.66008e+06	4.18186e+06	8.28961e+06	1.19104e+07	8.96987e+06	6.6723e+06	9.76458e+06	unknown
TGME49_260540	5.69285e+06	853327	4.26837e+06	1.233e+06	8.14433e+06	1.48817e+06	1.15872e+06	1.7759e+06	5.44445e+06	993437	1.25097e+06	1.21075e+06	IMC
TGME49_310430	3.80093e+06	3.12459e+06	2.83246e+06	3.43736e+06	3.60469e+06	3.18303e+06	2.379e+06	3.56538e+06	3.21014e+06	2.78054e+06	2.96749e+06	2.8687e+06	apicoplast
TGME49_275690	1.01129e+07	8.96608e+06	6.95848e+06	8.50949e+06	1.22491e+07	9.24297e+06	6.55033e+06	1.18176e+07	1.39669e+07	1.19846e+07	1.34075e+07	1.25357e+07	apicoplast
TGME49_269190	1.23555e+07	9.91127e+06	8.85425e+06	9.49505e+06	1.25942e+07	9.0407e+06	6.61267e+06	1.07837e+07	11692571	8.78326e+06	8.17735e+06	9.82732e+06	apicoplast
TGME49_250770	1.84013e+07	1.60623e+07	1.77679e+07	1.70317e+07	1.88046e+07	1.4691e+07	1.68677e+07	1.56846e+07	2.49403e+07	2.2598e+07	2.49101e+07	22258827	cytosol
TGME49_249900	2.12519e+07	1.69544e+07	2.07161e+07	1.76521e+07	2.07759e+07	1.69898e+07	1.52552e+07	1.91565e+07	2.06308e+07	1.87205e+07	1.74446e+07	1.82476e+07	mitochondrion - membranes
TGME49_201680	5.58161e+06	4.19039e+06	5.37615e+06	4.75502e+06	5.00848e+06	3.92984e+06	4.38699e+06	4.548e+06	4.52849e+06	4.23437e+06	4.8801e+06	4.13178e+06	nucleus - non-chromatin
TGME49_319900	1.14147e+07	498304	820653	614930	4.30195e+06	224771	231599	240353	6.69383e+06	295435	281337	301437	apical 1
TGME49_219850	3.07202e+06	2.4928e+06	3.04947e+06	2.83947e+06	4.98573e+06	4.12997e+06	4.67353e+06	5.19311e+06	4.86497e+06	5.27337e+06	5.87533e+06	4.68703e+06	cytosol
TGME49_319920	5.3655e+06	4.53139e+06	4.13867e+06	4.07393e+06	8.86236e+06	6.00141e+06	3.79522e+06	6.69141e+06	9.06662e+06	7.09901e+06	5.99227e+06	8.48921e+06	mitochondrion - membranes
TGME49_288500	1.29528e+07	9.68111e+06	7.26316e+06	9.34012e+06	1.82998e+07	9.4135e+06	5.67984e+06	1.31104e+07	1.13603e+07	7.34526e+06	5.50159e+06	8.43757e+06	mitochondrion - soluble
TGME49_225690	5.48631e+06	1.34015e+06	5.22906e+06	1.60853e+06	1.62888e+06	587827	488662	649573	680720	293905	536068	437962	apical 1
TGME49_258090	4.91336e+06	1.94904e+06	1.96416e+06	2.16895e+06	4.97597e+06	2.65292e+06	2.54484e+06	2.72422e+06	2.80826e+06	1.41026e+06	1.76181e+06	1.62756e+06	apical 1
TGME49_209030	1.10892e+07	1.11411e+07	1.05784e+07	1.0556e+07	1.53204e+07	1.48957e+07	1.33782e+07	1.40219e+07	1.13656e+07	1.14325e+07	1.20336e+07	1.10604e+07	cytosol
TGME49_247550	4.42659e+06	3.944e+06	3.29296e+06	3.7426e+06	3.90762e+06	2.87121e+06	2.05428e+06	3.66439e+06	3.58645e+06	3.40673e+06	2.85356e+06	3.39876e+06	mitochondrion - soluble
TGME49_261950	3.72656e+06	3.05714e+06	2.18188e+06	3.0147e+06	3.36357e+06	2.54574e+06	1.65906e+06	3.02037e+06	3.05002e+06	2.60835e+06	2.02998e+06	2.91787e+06	mitochondrion - membranes
TGME49_231630	5.12776e+06	1.56582e+06	1.47514e+07	2.12517e+06	7.093e+06	2.15154e+06	1.92137e+06	3.12985e+06	6.04397e+06	3.03512e+06	6.1124e+06	4.71881e+06	IMC
TGME49_244470	2.44429e+06	939942	1.10287e+06	968916	2.04755e+06	1.28736e+06	1.10474e+06	1.15954e+06	1.6159e+06	853846	971700	1.03031e+06	apical 1
TGME49_290670	5.59159e+06	4.58459e+06	4.9964e+06	4.52074e+06	6.56264e+06	5.31564e+06	4.9774e+06	5.42242e+06	5.67284e+06	4.63632e+06	4.14378e+06	4.85353e+06	unknown
TGME49_292080	2.08183e+06	1.59466e+06	1.83731e+06	1.71077e+06	2.02537e+06	1.60333e+06	1.54203e+06	1.88452e+06	1.11087e+06	1.08653e+06	1.11e+06	972017	cytosol
TGME49_231070	1.66666e+06	815134	1.38722e+06	950032	1.71993e+06	953610	869833	1.0705e+06	627152	476315	466273	506032	unknown
TGME49_263300	1.1077e+07	9.42063e+06	8.86187e+06	9.28483e+06	1.52684e+07	1.32412e+07	1.19284e+07	1.32267e+07	1.06662e+07	1.03018e+07	7.37414e+06	9.58456e+06	mitochondrion - membranes
TGME49_249390	1.9332e+06	1.1569e+06	909762	1.183e+06	2.67976e+06	1.40876e+06	884204	1.74381e+06	1.83428e+06	1.3358e+06	1.10096e+06	1.35114e+06	unknown
TGME49_206610	3.43983e+06	2.43811e+06	2.76099e+06	2.54591e+06	2.18654e+06	1.35912e+06	987726	1.62836e+06	1.97834e+06	1.65932e+06	1.91444e+06	1.87202e+06	apicoplast
TGME49_235470	8.32888e+06	4.19994e+06	3.84969e+06	4.76234e+06	8.29154e+06	5.21897e+06	5.15201e+06	4.84185e+06	9.0038e+06	6.35743e+06	3.73411e+06	4.60782e+06	IMC
TGME49_309752	3.10211e+07	2.30628e+07	1.83624e+07	2.31217e+07	4.36434e+07	2.45555e+07	1.49919e+07	3.17493e+07	3.37468e+07	2.47882e+07	1.77913e+07	2.71888e+07	mitochondrion - soluble
TGME49_236210	4.71036e+06	3.39706e+06	2.61952e+06	3.17106e+06	5.99697e+06	3.80326e+06	2.57603e+06	4.19583e+06	5.24016e+06	4.28127e+06	3.41213e+06	4.14637e+06	mitochondrion - membranes
TGME49_313380	2.98051e+06	1.532e+06	1.20582e+07	1.56084e+06	1.69895e+06	1.05009e+06	859093	1.14311e+06	1.05757e+06	628875	1.36535e+06	1.07752e+06	IMC
TGME49_243250	2.76893e+06	746621	937168	893917	2.62698e+06	819483	879837	975807	2.56975e+06	1.05993e+06	1.02129e+06	1.00483e+06	apical 2
TGME49_234420	5.14501e+06	3.12732e+06	2.38491e+06	3.15428e+06	4.93327e+06	2.41343e+06	1.95405e+06	3.33087e+06	2.56999e+06	1.84962e+06	1.39816e+06	2.11523e+06	mitochondrion - membranes
TGME49_202550	461599	269493	457683	327329	165147	103636	95742.8	116119	1383.08	NA	1061.19	1612.56	unknown
TGME49_267330	5.19807e+06	3.94689e+06	2.94156e+06	3.81821e+06	6.58195e+06	3.67967e+06	1.87225e+06	5.48226e+06	6.24921e+06	4.88774e+06	3.59034e+06	5.18059e+06	mitochondrion - soluble
TGME49_204350	2.15031e+06	2.03871e+06	1.50123e+06	1.7316e+06	1.74336e+06	1.48568e+06	1.15906e+06	1.70184e+06	2.77992e+06	2.35695e+06	2.86439e+06	2.56231e+06	apicoplast
TGME49_219800	2.55334e+06	2.00888e+06	2.1846e+06	2.26092e+06	3.41811e+06	2.7675e+06	3.22252e+06	3.15213e+06	2.12068e+06	2.04292e+06	2.06389e+06	2.09122e+06	unknown
TGME49_232340	2.88527e+06	239020	258895	277618	4.93566e+06	323355	305563	346966	427414	111781	89191.1	114545	cytosol
TGME49_215590	6.90995e+06	5.34978e+06	3.98826e+06	5.38161e+06	7.47994e+06	4.90726e+06	2.93567e+06	6.16267e+06	6.32429e+06	5.0593e+06	3.92775e+06	5.40486e+06	mitochondrion - soluble
TGME49_237010	6.94202e+06	4.88213e+06	3.73559e+06	4.75612e+06	7.65275e+06	4.57256e+06	3.22609e+06	5.78476e+06	5.52862e+06	4.39045e+06	3.74122e+06	4.25825e+06	mitochondrion - soluble
TGME49_260170	3.02881e+06	1.93421e+06	1.49611e+06	1.90948e+06	3.99081e+06	2.28868e+06	1.61512e+06	2.85344e+06	4.16995e+06	2.92934e+06	2.09648e+06	2.91652e+06	mitochondrion - soluble
TGME49_320030	885816	289089	410316	338266	1.10437e+06	558653	584425	614123	1.13752e+06	695303	676105	772795	apical 1
TGME49_286580	1.95241e+06	1.25347e+06	2.09054e+06	1.47217e+06	1.7806e+06	1.11554e+06	1.13603e+06	1.32341e+06	780445	783865	643380	742393	IMC
TGME49_247050	735142	462081	346099	472182	254434	165203	168576	220064	244272	217912	202921	240198	unknown
TGME49_230920	97697.2	50364	73699.6	80122.4	479576	258935	229009	296298	209791	219128	298964	260535	unknown
TGME49_248340	1.99577e+07	1.70185e+07	1.94931e+07	1.88158e+07	1.95862e+07	1.72125e+07	1.83351e+07	1.8207e+07	1.84629e+07	1.82366e+07	1.88295e+07	1.67985e+07	unknown
TGME49_289760	2.25513e+06	1.86897e+06	1.54445e+06	1.80098e+06	2.47167e+06	2.13576e+06	2.18296e+06	1.96851e+06	2.42281e+06	2.25064e+06	2.16609e+06	2.06646e+06	unknown
TGME49_286620	1.25475e+06	976441	854315	884838	1.2986e+06	1.11432e+06	872649	1.2063e+06	1.81859e+06	1.56369e+06	1.8239e+06	1.66846e+06	apicoplast
TGME49_320050	8.89494e+06	6.69239e+06	7.72351e+06	6.56655e+06	1.24731e+07	9.36093e+06	9.58805e+06	9.23132e+06	9.51184e+06	8.90482e+06	7.81282e+06	8.71713e+06	cytosol
TGME49_214750	3.71823e+06	2.59526e+06	1.79501e+06	2.31791e+06	4.50542e+06	3.32475e+06	2.56369e+06	3.36655e+06	3.36281e+06	2.69924e+06	2.39861e+06	2.66526e+06	mitochondrion - soluble
TGME49_318440	677562	536778	497688	567990	738003	536067	568092	669796	468038	430942	346754	374115	nucleus - non-chromatin
TGME49_270510	1.80154e+07	1.28926e+07	1.6432e+07	1.53237e+07	1.79342e+07	1.11459e+07	1.35678e+07	1.49919e+07	1.40796e+07	1.42097e+07	1.41573e+07	1.39068e+07	cytosol
TGME49_253140	498472	366520	343919	532855	614142	446265	402631	540179	271856	236846	278927	284508	unknown
TGME49_247510	6.23259e+06	5.69159e+06	6.46075e+06	6.03412e+06	8.18016e+06	6.7225e+06	7.30134e+06	8.57026e+06	6.32455e+06	6.8892e+06	7.58687e+06	6.80657e+06	cytosol
TGME49_288830	4.65808e+06	3.03262e+06	2.9406e+06	3.16284e+06	5.31821e+06	3.03452e+06	2.34209e+06	3.55906e+06	5.61519e+06	4.13423e+06	3.29902e+06	3.88399e+06	mitochondrion - membranes
TGME49_204400	5.90928e+06	4.99162e+06	3.20387e+06	5.16287e+06	7.74633e+06	6.26594e+06	3.97045e+06	6.05861e+06	7.18209e+06	5.85549e+06	4.40198e+06	5.86603e+06	mitochondrion - membranes
TGME49_250820	3.69493e+06	1.21888e+06	3.24735e+06	1.35499e+06	1.86402e+06	622745	537727	747472	787963	337002	563685	456963	apical 1
TGME49_266990	821510	614881	640309	656268	965764	770657	853425	919557	1.20425e+06	1.12779e+06	1.07754e+06	991068	unknown
TGME49_294620	945562	650992	868027	761669	1.68512e+06	1.12179e+06	1.44936e+06	1.49968e+06	1.34397e+06	1.29826e+06	1.4586e+06	1.27287e+06	nucleus - non-chromatin
TGME49_209600	5.26736e+06	4.16884e+06	5.31168e+06	4.72157e+06	4.75773e+06	3.78278e+06	4.3681e+06	4.20928e+06	3.58111e+06	3.55924e+06	3.97345e+06	3.46459e+06	unknown
TGME49_262960	6.73179e+06	5.63907e+06	5.27446e+06	5.71252e+06	1.03867e+07	7.78741e+06	8.37389e+06	8.35001e+06	7.25551e+06	5.65303e+06	4.98317e+06	5.61975e+06	unknown
TGME49_243960	755051	557474	598870	551384	853548	702152	844833	878072	572707	503526	534157	433944	nucleus - non-chromatin
TGME49_216860	4.7599e+06	3.55827e+06	3.97086e+06	3.90872e+06	5.54673e+06	4.46403e+06	5.04978e+06	5.05911e+06	3.4336e+06	3.3458e+06	3.60492e+06	3.00105e+06	cytosol
TGME49_312630	468653	396818	386123	361808	804624	594811	627337	596267	781720	842113	648780	711473	cytosol
TGME49_205470	2.5928e+06	1.77107e+06	1.59006e+06	1.86982e+06	2.91768e+06	2.52332e+06	2.71415e+06	2.37449e+06	2.66591e+06	2.57023e+06	2.59245e+06	2.14744e+06	cytosol
TGME49_313495	516818	444978	378014	406540	358047	326415	275698	357673	776919	690280	796856	722646	unknown
TGME49_206470	3.69026e+06	1.89914e+06	1.87431e+06	2.29243e+06	3.40693e+06	1.50622e+06	1.58573e+06	2.01702e+06	3.04916e+06	2.49494e+06	2.254e+06	2.30002e+06	mitochondrion - soluble
TGME49_310750	198406	163927	130315	179565	318257	273506	333342	364327	374688	374779	277108	273996	Golgi
TGME49_273460	1.30515e+06	929886	923047	917390	1.40194e+06	1.07215e+06	1.23808e+06	1.14878e+06	1.87034e+06	1.70986e+06	1.49922e+06	1.49611e+06	unknown
TGME49_219550	1.47015e+07	1.25872e+07	1.44747e+07	1.18065e+07	1.63489e+07	1.46428e+07	1.24751e+07	1.43441e+07	1.50332e+07	1.22157e+07	1.16779e+07	1.22333e+07	mitochondrion - soluble
TGME49_298610	120475	50672.1	57584.4	107333	42892.2	26299.8	25804.4	35607.9	NA	NA	720.656	1305.48	nucleus - chromatin
TGME49_290600	8.70432e+06	7.34531e+06	4.60336e+06	6.47085e+06	1.19254e+07	6.70827e+06	3.33276e+06	9.42767e+06	9.16494e+06	6.51776e+06	4.66905e+06	7.45337e+06	mitochondrion - soluble
TGME49_227000	2.10523e+06	858066	977982	905997	2.15921e+06	1.05138e+06	1.10458e+06	1.15925e+06	754568	385093	434282	436713	apical 1
TGME49_240600	4.22343e+06	3.88136e+06	3.62795e+06	3.79087e+06	3.68269e+06	3.88272e+06	3.28108e+06	3.89343e+06	3.62884e+06	3.61259e+06	4.66317e+06	4.03839e+06	apicoplast
TGME49_298990	1.58544e+06	1.48633e+06	1.05309e+06	1.28805e+06	1.8443e+06	1.51114e+06	1.17724e+06	1.6659e+06	2.40916e+06	2.12094e+06	2.5846e+06	2.26027e+06	apicoplast
TGME49_232710	4.89073e+06	3.54326e+06	4.57479e+06	3.6535e+06	6.07846e+06	4.59994e+06	5.22683e+06	5.1261e+06	5.00931e+06	4.39201e+06	4.45655e+06	3.94033e+06	40S ribosome
TGME49_268650	1.63427e+06	1.00203e+06	840103	903869	2.14107e+06	1.23841e+06	793910	1.4962e+06	1.92784e+06	1.44879e+06	1.06946e+06	1.36746e+06	mitochondrion - soluble
TGME49_247280	655759	414143	315572	373900	1.04724e+06	706263	523290	768934	831355	648929	765694	682713	apicoplast
TGME49_294200	2.14652e+06	3.03924e+06	3.51626e+06	3.13967e+06	1.88478e+06	2.4521e+06	2.25688e+06	3.0091e+06	1.80228e+06	3.16259e+06	2.69332e+06	3.0593e+06	dense granules
TGME49_272475	490988	339931	275052	307987	NA	NA	NA	NA	NA	NA	NA	NA	NA
TGME49_309120	3.52355e+06	2.28562e+06	2.67909e+06	2.45196e+06	2.59405e+06	1.74411e+06	1.98606e+06	2.10194e+06	1.77801e+06	1.61642e+06	1.55202e+06	1.52308e+06	60S ribosome
TGME49_230850	2.95656e+06	711854	2.23929e+06	840725	729377	158421	120222	174086	2.19002e+06	575883	576585	612144	IMC
TGME49_297720	518586	359577	561504	408270	127398	104242	84564.5	97573.5	NA	NA	NA	NA	cytosol
TGME49_207440	1.05992e+07	8.32002e+06	9.02689e+06	9.15994e+06	1.72314e+07	1.40545e+07	1.55658e+07	1.47302e+07	1.40843e+07	1.23216e+07	1.3533e+07	1.2839e+07	40S ribosome
TGME49_207620	1.84522e+06	1.57252e+06	1.47819e+06	1.67431e+06	2.40878e+06	1.75681e+06	1.7069e+06	2.16732e+06	2.29839e+06	2.28402e+06	2.21854e+06	2.28932e+06	mitochondrion - soluble
TGME49_251500	1.71355e+06	1.30074e+06	1.60859e+06	1.53099e+06	2.25292e+06	1.64847e+06	1.8129e+06	1.96474e+06	1.21132e+06	1.32908e+06	1.4555e+06	1.22593e+06	unknown
TGME49_227360	4.79311e+06	3.19862e+06	3.54979e+06	3.34443e+06	7.30528e+06	4.81144e+06	4.82247e+06	4.9641e+06	6.55658e+06	5.27698e+06	4.62101e+06	4.89983e+06	60S ribosome
TGME49_212260	578910	415178	346328	396909	206790	139472	52628.8	115917	128139	132253	86849.2	114489	unknown
TGME49_210730	1.39737e+06	968823	718382	956084	2.01917e+06	1.19086e+06	872040	1.38163e+06	732749	553000	413017	561805	mitochondrion - soluble
TGME49_311470	1.17661e+06	784428	709880	819985	616893	471594	489642	519513	764324	638764	523809	498167	rhoptries 1
TGME49_202680	2.61101e+06	1.90222e+06	1.52616e+06	1.88661e+06	4.75305e+06	3.26898e+06	2.18053e+06	3.79755e+06	5.03081e+06	3.88843e+06	2.82882e+06	3.70324e+06	mitochondrion - membranes
TGME49_236650	1.59642e+06	1.21916e+06	1.25703e+06	1.23923e+06	1.44615e+06	1.10695e+06	1.25806e+06	1.20762e+06	1.36986e+06	1.28428e+06	1.20656e+06	1.1296e+06	nucleus - non-chromatin
TGME49_260450	805653	809370	685870	753018	720661	725743	625154	901163	1.10415e+06	1.09525e+06	1.31423e+06	1.13734e+06	apicoplast
TGME49_302050	1.26352e+06	1.15778e+06	1.07757e+06	999506	2.25653e+06	2.10718e+06	1.53514e+06	2.29738e+06	2.2146e+06	2.0981e+06	2.35209e+06	2.10045e+06	apicoplast
TGME49_240870	829515	497024	641335	569767	963553	511258	619542	778728	711959	679950	639736	634300	unknown
TGME49_304710	642683	549678	601371	602892	445983	386961	419170	451652	1.28244e+06	1.3881e+06	1.3015e+06	1.19017e+06	unknown
TGME49_202630	1.22843e+06	923629	710856	878451	501065	395533	318032	432773	646410	534422	388782	552793	mitochondrion - membranes
TGME49_262670	5.27336e+06	3.89633e+06	4.42158e+06	3.87403e+06	1.09811e+07	8.26398e+06	9.11812e+06	8.98345e+06	8.54416e+06	7.76683e+06	7.37582e+06	7.25943e+06	60S ribosome
TGME49_223790	994297	358747	428447	396920	847209	440623	464185	483255	686429	304940	393112	388386	apical 1
TGME49_235340	486818	370335	721102	358627	289841	232352	222540	232424	NA	NA	NA	NA	IMC
TGME49_222300	1.44317e+06	1.26666e+06	1.21782e+06	1.18167e+06	1.95861e+06	1.70845e+06	1.69691e+06	1.70421e+06	1.57025e+06	1.62988e+06	1.7897e+06	1.77209e+06	apicoplast
TGME49_245460	6.88428e+06	5.88189e+06	5.69173e+06	5.49771e+06	7.37919e+06	6.11738e+06	5.55972e+06	5.66358e+06	5.02458e+06	4.21717e+06	3.69571e+06	4.02568e+06	40S ribosome
TGME49_226400	1.23241e+06	1.18934e+06	953080	1.0249e+06	780335	698377	485718	885706	3.14209e+06	3.08766e+06	3.31388e+06	3.15105e+06	apicoplast
TGME49_309885	279877	202407	220037	221337	404444	160838	156739	265533	96791.9	88674	85915.2	87197.5	unknown
TGME49_302000	1.70973e+06	1.70016e+06	1.41727e+06	1.55579e+06	1.15788e+06	916940	878580	1.13779e+06	1.73343e+06	1.90472e+06	2.17483e+06	1.94116e+06	apicoplast
TGME49_225990	2.06526e+06	1.96315e+06	1.5699e+06	1.7778e+06	1.70206e+06	1.4675e+06	954799	2.00083e+06	2.28103e+06	1.92274e+06	2.29442e+06	2.31272e+06	apicoplast
TGME49_211890	491428	414559	325785	381000	504391	425900	355744	460733	770139	660912	798130	713065	apicoplast
TGME49_311430	4.64748e+06	3.7855e+06	4.30865e+06	4.1727e+06	3.77502e+06	3.1162e+06	3.06326e+06	3.58039e+06	3.6623e+06	3.58399e+06	3.38123e+06	3.19272e+06	nucleolus
TGME49_239820	2.11372e+06	1.85593e+06	2.0292e+06	1.92735e+06	1.79313e+06	1.57684e+06	1.60716e+06	1.77734e+06	1.23698e+06	1.24112e+06	1.25174e+06	1.11808e+06	nucleus - non-chromatin
TGME49_204020	5.69784e+06	4.29501e+06	5.15391e+06	4.46705e+06	3.32218e+06	2.56645e+06	2.92285e+06	3.24092e+06	4.82681e+06	4.17792e+06	4.34401e+06	4.16832e+06	60S ribosome
TGME49_226250	514940	344138	364090	359940	1.17489e+06	996423	1.11486e+06	998014	484160	400007	359927	313799	unknown
TGME49_216000	1.49492e+06	705987	6.35725e+06	736855	999432	547108	419306	602887	777997	530329	1.29439e+06	886078	IMC
TGME49_226960	1.48374e+06	1.08687e+06	1.07102e+06	1.12787e+06	1.48764e+06	1.21789e+06	1.32975e+06	1.06043e+06	513560	406761	431427	414095	cytosol
TGME49_314265	203317	129515	109722	150743	142970	68814.6	110795	100842	24950.7	47605.4	39885	41499.6	unknown
TGME49_261570	8.30343e+06	6.61912e+06	7.84971e+06	6.58225e+06	1.15857e+07	9.17156e+06	9.51108e+06	8.63749e+06	9.96598e+06	9.41158e+06	7.4594e+06	8.09887e+06	60S ribosome
TGME49_205615	360665	283921	238323	264798	303681	271531	253889	327300	467700	444534	524772	486609	NA
TGME49_252880	298833	104861	107875	102782	256971	131226	119214	155474	347427	289366	246663	257894	apical 1
TGME49_324600	3.60509e+06	2.79903e+06	3.05947e+06	2.81019e+06	5.3215e+06	4.01564e+06	3.86368e+06	5.05605e+06	4.07657e+06	4.46106e+06	3.02803e+06	3.95388e+06	IMC
TGME49_272290	4.35647e+06	3.26743e+06	2.54201e+06	2.92439e+06	6.07869e+06	4.15631e+06	3.27483e+06	4.80666e+06	4.46434e+06	3.02925e+06	3.51045e+06	3.30768e+06	apicoplast
TGME49_313010	2.3253e+06	1.78093e+06	1.94453e+06	2.02171e+06	2.60753e+06	2.04132e+06	2.17399e+06	2.39956e+06	2.20767e+06	1.97212e+06	2.13708e+06	1.94279e+06	nucleus - non-chromatin
TGME49_213388	219304	159625	128865	202306	333236	215579	216395	260630	212528	166419	209710	203969	unknown
TGME49_274060	2.01656e+06	1.54889e+06	1.76984e+06	1.66463e+06	1.98337e+06	1.62483e+06	1.66117e+06	1.93891e+06	1.57939e+06	1.61644e+06	1.4398e+06	1.49979e+06	mitochondrion - membranes
TGME49_301120	1.539e+06	1.0402e+06	788371	1.00666e+06	1.56063e+06	1.18388e+06	716645	1.10267e+06	966724	767650	553446	778676	mitochondrion - soluble
TGME49_232300	1.03996e+07	8.25161e+06	9.33821e+06	9.55496e+06	8.9259e+06	6.96859e+06	8.69581e+06	8.57546e+06	9.62175e+06	9.62022e+06	1.07914e+07	1.00703e+07	40S ribosome
TGME49_305520	9.92902e+06	7.10549e+06	1.00276e+07	8.42215e+06	1.45081e+07	1.13604e+07	1.33432e+07	1.26232e+07	1.20908e+07	1.07606e+07	1.21179e+07	1.12517e+07	40S ribosome
TGME49_239100	4.66389e+06	3.58728e+06	4.8205e+06	3.99083e+06	5.55817e+06	4.39274e+06	5.18947e+06	4.66751e+06	4.00117e+06	3.97097e+06	4.2664e+06	3.82899e+06	40S ribosome
TGME49_306430	735321	477774	481052	554381	1.62893e+06	490142	773863	421480	83875.3	85457.1	94712.1	86301.8	nucleus - chromatin
TGME49_245640	3.51528e+06	1.39383e+06	1.50167e+06	1.46147e+06	4.10545e+06	1.90698e+06	1.90602e+06	2.11227e+06	2.3632e+06	1.04422e+06	1.25711e+06	1.20643e+06	apical 1
TGME49_257470	265824	72862.4	94043.8	78607	293251	170716	145662	196548	46408.5	30348.3	25912.9	32567	unknown
TGME49_305980	1.95629e+06	1.70172e+06	1.38339e+06	1.58979e+06	2.52047e+06	2.06736e+06	1.71915e+06	2.61673e+06	1.27017e+06	1.06029e+06	1.19517e+06	1.22958e+06	apicoplast
TGME49_292360	2.89957e+06	2.37391e+06	2.00495e+06	2.11639e+06	2.83841e+06	2.49971e+06	2.04648e+06	2.84752e+06	1.71647e+06	1.48573e+06	1.83059e+06	1.56558e+06	apicoplast
TGME49_284560	1.97023e+06	1.59154e+06	1.83232e+06	1.63966e+06	3.28101e+06	2.34359e+06	2.73935e+06	2.729e+06	3.26635e+06	2.87503e+06	2.72513e+06	2.82623e+06	60S ribosome
TGME49_308090	3.66895e+06	1.97697e+06	1.945e+06	2.01496e+06	3.84332e+06	3.36695e+06	3.55995e+06	3.38026e+06	2.61644e+06	2.25886e+06	1.71986e+06	1.7059e+06	rhoptries 1
TGME49_293590	2.42266e+06	2.28174e+06	1.92741e+06	2.21065e+06	1.64141e+06	1.53184e+06	1.56903e+06	1.75177e+06	2.70499e+06	2.47825e+06	2.81741e+06	2.49631e+06	apicoplast
TGME49_314400	1.7131e+06	1.24936e+06	1.11716e+06	1.1532e+06	2.26517e+06	1.35372e+06	890953	1.64997e+06	1.54803e+06	1.2221e+06	941454	1.32424e+06	mitochondrion - soluble
TGME49_310440	593810	295451	479255	354314	465433	305175	190649	277836	139706	123048	100250	112326	unknown
TGME49_321620	509028	285628	659374	322454	15018.7	3653.07	11456.7	6276.1	NA	NA	NA	NA	nucleus - chromatin
TGME49_285980	2.39775e+06	1.99201e+06	2.29956e+06	2.00045e+06	2.12057e+06	1.81028e+06	1.9449e+06	1.91749e+06	2.22328e+06	2.39211e+06	2.28019e+06	2.43619e+06	cytosol
TGME49_245680	6.04131e+06	4.30565e+06	5.3145e+06	4.73045e+06	4.90691e+06	4.07183e+06	4.26588e+06	4.54462e+06	4.4162e+06	3.99703e+06	4.28484e+06	4.11473e+06	60S ribosome
TGME49_278830	953274	734404	764194	759578	712534	528053	588187	674117	537169	555552	534343	548659	unknown
TGME49_300100	1.25588e+06	734560	626855	868848	996861	707119	761164	772461	1.01659e+06	894875	674833	672655	rhoptries 1
TGME49_263870	648915	507536	531385	493513	686676	566068	602993	623863	904204	869016	817773	737203	cytosol
TGME49_242010	788273	643926	569949	618921	315008	318518	225485	363976	1.06379e+06	957198	1.13144e+06	1.03118e+06	unknown
TGME49_211690	979492	762014	792346	816787	816810	604275	549145	604085	124101	111535	98070.6	99361.3	unknown
TGME49_217020	414827	278344	240545	269061	541432	298003	212159	339233	553082	404952	319296	435102	mitochondrion - soluble
TGME49_207760	615021	458392	321154	451210	941499	609732	426803	796366	1.02397e+06	848379	631281	941896	mitochondrion - soluble
TGME49_210690	2.62674e+06	1.94794e+06	2.56219e+06	2.14257e+06	3.50037e+06	2.80368e+06	3.24956e+06	3.0963e+06	3.02135e+06	2.7296e+06	2.85099e+06	2.62158e+06	40S ribosome
TGME49_219320	2.1622e+06	950792	942394	969034	3.02691e+06	1.92843e+06	1.90859e+06	2.02375e+06	2.87762e+06	2.01759e+06	1.46575e+06	1.64179e+06	IMC
TGME49_280370	171325	132422	98617.5	135466	32436.6	7609.27	11690.6	9484.7	NA	NA	NA	NA	unknown
TGME49_263700	4.30865e+06	3.48125e+06	3.92016e+06	3.69519e+06	5.25427e+06	4.42867e+06	5.19794e+06	4.90375e+06	3.47728e+06	3.38039e+06	3.678e+06	3.44777e+06	40S ribosome
TGME49_226790	503916	401272	286367	381773	356812	321304	284276	363597	220358	172824	219001	196864	NA
TGME49_300140	2.44018e+06	2.03605e+06	1.73258e+06	2.09791e+06	2.51876e+06	2.06766e+06	2.49857e+06	2.26112e+06	1.16951e+06	1.2116e+06	936106	990476	cytosol
TGME49_265360	760951	497935	386452	459013	1.2223e+06	540122	420701	755489	1.50842e+06	1.18185e+06	873701	1.19144e+06	mitochondrion - soluble
TGME49_247470	360238	320387	299207	358608	149317	119428	124159	128484	37244.9	43384.5	41687.2	34606.9	cytosol
TGME49_278660	273063	135033	151814	175205	207752	125176	127589	136423	137686	124054	107818	100687	PM - integral
TGME49_263980	128634	102258	109640	97446.7	512849	456711	406452	501704	510511	451156	506111	471583	NA
TGME49_253650	1.45758e+06	953200	667133	749973	2.32511e+06	1.32704e+06	1.03425e+06	1.69206e+06	1.28227e+06	1.32771e+06	1.57399e+06	1.3786e+06	apicoplast
TGME49_229360	812281	600257	631971	613817	659710	702384	582803	442991	644322	623399	522760	586712	nucleus - non-chromatin
TGME49_313140	3.5739e+06	3.27071e+06	2.16425e+06	2.99421e+06	2.51095e+06	1.87676e+06	1.09071e+06	2.53749e+06	2.56101e+06	2.02626e+06	1.60215e+06	2.22281e+06	mitochondrion - soluble
TGME49_201270	946189	860753	718122	813801	1.5032e+06	1.39795e+06	1.18934e+06	1.51922e+06	1.69838e+06	1.74669e+06	2.07828e+06	1.62827e+06	apicoplast
TGME49_314970	707740	560437	612207	604177	302346	254984	287754	285590	668978	726036	760048	679496	ER
TGME49_258560	1.33197e+06	1.07564e+06	803077	864059	1.35108e+06	1.18253e+06	928557	1.3676e+06	1.90418e+06	1.55667e+06	1.68961e+06	1.60969e+06	apicoplast
TGME49_241170	663844	452661	453749	568931	730869	543009	530488	625051	723225	450596	392456	421503	nucleus - chromatin
TGME49_273520	600505	451742	548992	524170	664423	462600	564201	583890	1.18195e+06	1.10091e+06	1.12887e+06	956559	nucleus - non-chromatin
TGME49_314100	538571	413352	479959	403036	609037	462535	440259	502607	281553	251896	335216	248184	cytosol
TGME49_230420	851279	554770	495353	662164	236370	253622	253875	245240	277827	225118	192168	217279	ER
TGME49_313240	1.06279e+06	682880	567389	704683	1.62792e+06	961202	769083	1.097e+06	1.2202e+06	918057	748982	853882	mitochondrion - soluble
TGME49_271820	1.88692e+06	1.31241e+06	922351	1.19014e+06	4.86804e+06	2.49859e+06	1.9241e+06	3.19548e+06	4.1322e+06	2.975e+06	2.00808e+06	3.16504e+06	mitochondrion - soluble
TGME49_230160	1.95626e+06	969937	6.25997e+06	1.1765e+06	1.53766e+06	923626	770540	1.07204e+06	2.08671e+06	1.81615e+06	2.37857e+06	2.05728e+06	IMC
TGME49_256770	994493	699810	820168	746734	1.3796e+06	984165	1.10774e+06	1.29077e+06	1.36665e+06	1.30494e+06	1.28334e+06	1.16648e+06	nucleus - non-chromatin
TGME49_223390	438631	328198	275912	324975	691467	568139	583306	590243	437275	377824	266722	292785	nucleus - non-chromatin
TGME49_308860	7.3401e+06	2.25708e+06	5.97726e+06	2.48637e+06	3.49964e+06	1.22614e+06	928656	1.41117e+06	2.70615e+06	1.17139e+06	1.88693e+06	1.54408e+06	apical 1
TGME49_268890	2.71617e+06	1.97688e+06	1.43374e+06	1.78016e+06	3.82488e+06	2.36386e+06	1.3384e+06	3.13567e+06	4.28361e+06	3.56789e+06	2.52594e+06	3.70231e+06	mitochondrion - soluble
TGME49_217460	485665	300118	273295	325576	342241	236652	268666	289698	217429	195478	166758	163812	cytosol
TGME49_217740	1.21023e+06	1.01635e+06	685143	1.00345e+06	2.34354e+06	1.76487e+06	1.41801e+06	2.05625e+06	2.12589e+06	1.8995e+06	1.84604e+06	2.19672e+06	apicoplast
TGME49_218840	385756	221662	185352	225506	174883	121063	95631.8	160872	621059	483051	450716	461923	mitochondrion - soluble
TGME49_277030	113254	104752	78072.3	90160.6	171806	127962	138620	150427	147567	126539	169519	154293	NA
TGME49_306060	627480	420873	380525	498484	631399	525372	513570	639153	296454	285949	209906	213005	rhoptries 1
TGME49_262620	2.19439e+06	1.38776e+06	1.39163e+06	1.35727e+06	1.63624e+06	1.14992e+06	947830	1.31941e+06	1.43498e+06	1.22633e+06	1.02338e+06	1.09675e+06	nucleus - non-chromatin
TGME49_262430	341146	290824	229181	267620	294669	253959	172777	299287	772806	701546	699167	723414	apicoplast
TGME49_287500	1.24427e+06	1.12512e+06	1.09177e+06	951683	1.08722e+06	967816	883006	970448	1.15803e+06	1.05293e+06	1.00371e+06	957158	cytosol
TGME49_292130	6.65279e+06	4.75487e+06	5.28436e+06	4.95208e+06	9.74372e+06	6.66159e+06	7.3663e+06	7.62035e+06	8.28294e+06	7.00574e+06	6.69219e+06	6.68533e+06	60S ribosome
TGME49_226730	1.08918e+06	799254	630383	780508	929894	589843	376301	732055	1.91067e+06	1.51583e+06	1.18847e+06	1.58333e+06	mitochondrion - soluble
TGME49_262920	355384	245509	191329	267174	408506	321561	340415	368774	637158	576090	480474	492529	rhoptries 1
TGME49_208560	1.0062e+06	742455	612788	757337	1.06703e+06	726233	548738	868823	759142	619139	565076	643079	apicoplast
TGME49_313390	5.71752e+06	4.56119e+06	5.60809e+06	4.68133e+06	4.21462e+06	3.37683e+06	3.23061e+06	3.43424e+06	1.60552e+06	1.5841e+06	1.32038e+06	1.4245e+06	60S ribosome
TGME49_227948	266861	206693	151263	160214	551883	427163	307277	429720	489409	504573	401124	504070	unknown
TGME49_253900	1.31206e+06	1.2912e+06	1.0479e+06	1.08017e+06	1.12097e+06	1.01097e+06	757463	1.35059e+06	1.497e+06	1.24567e+06	1.54958e+06	1.40199e+06	apicoplast
TGME49_219682	590494	413087	304220	393883	527096	282576	200110	333381	550855	483153	442364	450846	mitochondrion - soluble
TGME49_230210	327806	179343	669878	193867	304906	195001	160305	207148	82499.1	94532.1	80756.1	78598.3	IMC
TGME49_259260	186817	161884	156172	135412	332229	259384	264006	299693	491964	499085	491291	494925	apicoplast
TGME49_268850	325104	281642	273355	225008	439252	476351	401026	344041	214870	213076	162214	221928	cytosol
TGME49_313230	738380	571893	597593	538691	901295	671833	698766	766026	947891	828993	770790	770475	cytosol
TGME49_209260	2.97617e+06	1.56411e+06	1.12554e+06	1.40931e+06	3.46775e+06	1.59845e+06	1.07906e+06	2.01885e+06	3.6775e+06	2.33936e+06	2.29503e+06	2.18404e+06	mitochondrion - membranes
TGME49_253430	1.51721e+06	1.11182e+06	1.26779e+06	1.22478e+06	2.05389e+06	1.67635e+06	1.75328e+06	1.7527e+06	1.02705e+06	922432	947020	989069	cytosol
TGME49_251890	98988.2	63080.2	53244.5	63433.8	165846	124639	105382	115266	261696	226768	191669	219554	mitochondrion - soluble
TGME49_243950	2.47147e+06	1.95031e+06	1.95933e+06	2.25734e+06	3.25982e+06	2.53013e+06	2.46526e+06	2.81803e+06	2.20074e+06	2.15464e+06	1.99571e+06	2.11474e+06	mitochondrion - membranes
TGME49_294670	252320	174938	218748	214301	503675	422819	391156	411772	85019.6	71476.5	67561.4	65006.6	nucleus - non-chromatin
TGME49_272910	310917	298383	272081	320044	414532	323625	320292	318060	345682	329452	329664	303872	cytosol
TGME49_243298	4004.4	1152.8	3050.14	3361.18	98954.1	51565	38852.5	48287.1	27763	23921.9	22466.3	26180.9	NA
TGME49_295110	2.3154e+06	1.33289e+06	1.47569e+06	1.33327e+06	1.75666e+06	1.41724e+06	1.21938e+06	1.41565e+06	2.24991e+06	1.70535e+06	1.73656e+06	1.73987e+06	rhoptries 1
TGME49_226970	4.70528e+06	3.83466e+06	5.40287e+06	4.0546e+06	6.62537e+06	4.84383e+06	5.87274e+06	5.25302e+06	4.92713e+06	4.73234e+06	5.04535e+06	4.73638e+06	40S ribosome
TGME49_293360	101441	55798.4	454609	71006	NA	NA	NA	NA	NA	NA	NA	NA	unknown
TGME49_277895	75502.4	65332.5	74493.3	84088.3	20949.3	16440.7	7744.34	16529.3	12460.2	7375.02	4954.06	6585.07	nucleus - chromatin
TGME49_261850	126495	85762.9	79503.4	88146.3	186005	112720	73847.1	135465	268529	205882	203147	222011	apicoplast
TGME49_237150	1.4882e+06	1.04783e+06	1.21782e+06	1.08843e+06	1.6227e+06	1.13495e+06	1.10017e+06	1.29202e+06	757583	663169	607447	659200	ER
TGME49_286590	1.05704e+06	608200	1.03372e+06	624418	1.42612e+06	1.01404e+06	1.06266e+06	1.08297e+06	1.27906e+06	1.03787e+06	1.0134e+06	1.08609e+06	tubulin cytoskeleton
TGME49_246590	173777	133347	125027	201055	187388	146094	152327	160362	NA	NA	NA	NA	unknown
TGME49_224850	571599	270141	281702	293646	936979	542910	556724	645449	288357	216244	196539	176258	nucleus - non-chromatin
TGME49_299050	759352	503501	660119	556747	725712	497548	594545	630749	813870	719156	731305	747690	60S ribosome
TGME49_207640	752682	585475	666642	641628	600701	421755	498534	512419	656389	704759	654555	604253	cytosol
TGME49_312090	4.8012e+06	3.66757e+06	4.38658e+06	4.09925e+06	8.80169e+06	6.11262e+06	6.92826e+06	7.41648e+06	4.55787e+06	4.02865e+06	4.27055e+06	3.91032e+06	60S ribosome
TGME49_222220	1.07933e+06	457150	1.86243e+06	567454	797249	340007	338032	485048	485904	274694	293604	280090	IMC
TGME49_256990	485919	324102	315227	343617	520791	423085	445866	455430	368531	398111	383083	328555	cytosol
TGME49_308580	941989	688528	542485	683167	640581	423434	337677	480137	1.2394e+06	1.04276e+06	804419	960966	mitochondrion - soluble
TGME49_234450	3.57519e+06	2.97191e+06	3.14468e+06	2.94865e+06	3.01677e+06	2.34062e+06	2.54426e+06	2.67199e+06	2.72341e+06	2.66494e+06	2.93746e+06	2.55063e+06	40S ribosome
TGME49_271930	463379	201891	1.90897e+06	240895	63677.6	40277	26290.1	39886.4	84790.6	72721	146658	111495	IMC
TGME49_320480	260580	209225	206765	190780	753552	571175	499478	537058	500392	397284	421068	391522	PM - integral
TGME49_213310	349353	161359	129927	168821	242086	153380	104327	182243	403507	323755	282944	363624	mitochondrion - soluble
TGME49_216880	332733	209644	227668	205590	837101	638755	607232	612660	473661	439691	343966	387801	cytosol
TGME49_245670	324920	300979	256930	287679	666447	529329	487628	605593	1.04763e+06	978547	919895	942833	apicoplast
TGME49_224090	2.97152e+06	1.86411e+06	1.37486e+06	1.85658e+06	3.28049e+06	1.6217e+06	1.02426e+06	2.29447e+06	3.21083e+06	2.29381e+06	1.53582e+06	2.23699e+06	mitochondrion - soluble
TGME49_289780	204398	111986	93349.7	116146	178212	122783	105505	119284	243239	188844	197878	204955	mitochondrion - soluble
TGME49_266760	116436	103148	94024.2	109754	NA	NA	NA	NA	52407.6	64329.3	52457.5	58484	unknown
TGME49_233100	1.28538e+06	954051	1.04066e+06	979387	1.21762e+06	759870	716731	979384	712585	662938	581790	623730	mitochondrion - membranes
TGME49_236140	542073	430889	384478	440882	121681	82610.9	50222.5	84844.1	335250	280141	219391	274765	mitochondrion - soluble
TGME49_313770	103229	54671.3	56801.4	67954.6	81376	48601.9	40984.6	53926.7	280710	263580	225614	261231	mitochondrion - soluble
TGME49_263070	449546	273095	298971	337341	556515	365021	404458	461408	464957	444996	379266	367647	unknown
TGME49_215460	1.76608e+06	1.24447e+06	1.74939e+06	1.34781e+06	996323	691059	735490	736606	2.79553e+06	2.5302e+06	2.58067e+06	2.4919e+06	40S ribosome
TGME49_232090	387633	301453	229830	287352	724025	566648	379330	624164	893012	774085	596559	741549	mitochondrion - soluble
TGME49_321640	1.29131e+06	965984	805789	965568	1.91922e+06	1.37758e+06	806886	1.85135e+06	1.9816e+06	1.47371e+06	1.36103e+06	1.68413e+06	apicoplast
TGME49_206600	294310	260667	206455	242634	673262	534019	447197	545880	862876	721546	834675	742077	NA
TGME49_263050	2.65836e+06	1.99894e+06	2.25918e+06	1.91304e+06	3.61381e+06	2.75869e+06	2.81211e+06	2.99387e+06	3.19939e+06	2.94503e+06	2.64574e+06	2.76553e+06	60S ribosome
TGME49_305850	826853	584526	614264	649819	795646	569614	577362	618316	612214	586903	575501	562374	nucleus - non-chromatin
TGME49_256840	504604	341565	280502	330254	592290	416000	301753	462684	665599	495050	503851	587849	apicoplast
TGME49_235380	1.04711e+06	454215	769832	586077	157711	38316.4	50220.7	49391.2	41476.2	24415.5	36999.4	40744.2	apical 1
TGME49_318710	480641	387538	446948	363694	389552	348490	335487	329589	309900	317269	255870	252021	nucleus - chromatin
TGME49_266640	387970	253729	257740	260863	64829.6	57495.8	57139.4	50095.6	40009.1	40060.1	29430.3	25203.4	cytosol
TGME49_244050	218657	175932	158268	164022	197014	146405	90441.8	184235	340176	302724	383081	336717	apicoplast
TGME49_220350	268375	251974	209922	264336	388699	304936	218584	336724	355038	309727	304426	320255	apicoplast
TGME49_288720	4.61915e+06	3.40152e+06	4.00581e+06	3.64536e+06	5.21357e+06	3.70537e+06	3.5432e+06	3.75286e+06	4.14491e+06	3.52959e+06	3.8862e+06	3.56297e+06	60S ribosome
TGME49_292220	611500	439899	419565	438151	297305	227557	257992	256608	175053	171802	142984	150123	19S proteasome
TGME49_300000	4.77455e+06	4.11487e+06	4.92082e+06	3.49162e+06	3.54805e+06	2.75569e+06	2.86599e+06	2.76816e+06	4.60142e+06	3.76259e+06	3.64197e+06	3.79835e+06	60S ribosome
TGME49_212250	1.00045e+06	743864	872868	789657	720854	523892	616099	646251	826877	746013	760997	821106	unknown
TGME49_288650	2.35935e+06	1.69861e+06	1.4055e+06	2.05369e+06	1.72091e+06	1.7552e+06	1.71731e+06	1.97953e+06	1.648e+06	1.98372e+06	1.39128e+06	1.55922e+06	dense granules
TGME49_276140	2.252e+06	1.83949e+06	1.6965e+06	1.58021e+06	3.15909e+06	2.49418e+06	2.06513e+06	2.16839e+06	1.44815e+06	1.26861e+06	1.18964e+06	1.30968e+06	unknown
TGME49_266630	1.02002e+06	389525	419268	416590	391918	179352	186262	204191	346568	171032	187463	214948	apical 1
TGME49_295420	199856	78325.5	73301.1	95701.2	218242	108697	114895	117791	257660	201215	182752	187368	apical 2
TGME49_295380	180591	104761	81910.1	94760.9	190794	128883	88094	129566	110786	85766.2	80660.8	82310.2	mitochondrion - soluble
TGME49_220270	237807	126265	933938	159678	8711.08	7773.37	4767.24	6850.03	NA	NA	NA	NA	IMC
TGME49_306520	345010	281933	207765	243855	747509	593706	514263	728760	847419	730870	820355	733470	NA
TGME49_235160	347918	274416	326702	298782	231299	178565	209389	250217	302282	316830	337607	278049	unknown
TGME49_222380	378531	274502	314649	295429	383799	273571	356548	344573	322739	301428	315637	292115	cytosol
TGME49_289050	73539.6	45852.9	54148.6	44784.6	44532	34903	24577.9	30490.3	NA	NA	NA	NA	unknown
TGME49_278780	1.93201e+06	803695	754210	689713	2.00578e+06	935563	1.02275e+06	991589	1.47821e+06	810924	867917	874567	apical 1
TGME49_237250	790113	610576	624349	673322	630660	504298	520297	638851	848404	838029	575720	677389	Golgi
TGME49_272520	261756	158238	345633	171178	203178	110238	89121.1	137342	127452	99901.6	97893.8	107906	IMC
TGME49_227420	243568	237720	180185	205579	239719	159841	123921	176181	629226	501419	509170	489361	apicoplast
TGME49_236040	1.37669e+06	452603	556895	375374	628473	490226	487613	395833	327713	234848	145641	190049	cytosol
TGME49_230520	1.04195e+06	779660	554248	710761	1.15864e+06	689053	399881	1.04763e+06	1.12765e+06	842346	556391	848626	unknown
TGME49_258070	477537	332811	369887	412234	518609	428738	375869	425454	485659	433021	462546	414672	unknown
TGME49_239490	1.9781e+06	1.53275e+06	1.19713e+06	1.32911e+06	2.24637e+06	1.39965e+06	882435	1.9882e+06	1.66523e+06	1.20857e+06	964790	1.32638e+06	mitochondrion - soluble
TGME49_258640	725356	563310	444492	517203	734922	527718	361320	684158	810430	668443	751818	692613	apicoplast
TGME49_253890	149627	151468	93438	123370	141679	113682	76621.3	150286	234593	172570	219867	201750	apicoplast
TGME49_266060	317941	239523	246060	260328	655702	543554	611166	570066	195147	161054	210002	154513	cytosol
TGME49_240860	1.44807e+06	862384	1.00275e+06	1.08452e+06	948252	705154	682543	869843	695933	583950	547274	549347	unknown
TGME49_263090	1.17177e+06	391750	643590	365885	530993	323018	285496	347889	274524	188754	174276	193780	cytosol
TGME49_233930	186208	108415	99339.7	104199	291925	177878	127839	219553	215555	132336	119726	143706	mitochondrion - soluble
TGME49_248300	100104	68860.8	63206.3	63597	277300	278274	312004	328099	933323	832773	965519	804708	apicoplast
TGME49_228470	3.53229e+06	2.67025e+06	3.37513e+06	2.30486e+06	4.88701e+06	3.6872e+06	3.47861e+06	3.64998e+06	6.04345e+06	5.39559e+06	4.6981e+06	5.17361e+06	60S ribosome
TGME49_264160	220287	142501	106294	113787	92757.8	62888.8	49559.1	72872.5	577414	434915	415461	422628	mitochondrion - soluble
TGME49_248480	3.33175e+06	2.84526e+06	3.58552e+06	2.99012e+06	4.03266e+06	3.15792e+06	3.64409e+06	3.54584e+06	5.43785e+06	5.23002e+06	5.31472e+06	4.50936e+06	40S ribosome
TGME49_295850	427063	37976.3	53626.3	49938.9	114104	1681.11	5218.29	4836.11	86504.4	2766.24	1106.67	2070.93	apical 2
TGME49_291140	147046	87954.9	88225.8	93649.6	97332.2	75669	85767.5	91502	90332.2	85080.7	79725.6	71862.4	unknown
TGME49_217890	2.11014e+06	431982	308901	352194	700220	429130	505230	513196	71683.6	50668.9	46897.1	42896.9	unknown
TGME49_233838	124917	86617.5	95669.7	90003.9	553180	414826	309326	545037	991794	920824	1.10452e+06	981324	apicoplast
TGME49_253290	327752	264504	266243	228277	362806	261951	259683	259873	200547	186594	139409	183901	cytosol
TGME49_315860	301483	202259	161179	220282	19934.3	9905.85	11386.4	14665.9	NA	NA	NA	NA	nucleus - chromatin
TGME49_205510	157621	95043.2	106498	123200	432522	334606	342022	382529	133772	136187	127126	116182	cytosol
TGME49_271970	1.63759e+06	647235	2.47068e+06	816333	798095	481054	453391	501823	1.20567e+06	780157	878395	851532	IMC
TGME49_217820	631058	514806	590221	548398	524774	445743	564413	532112	254062	276360	303925	260756	nucleus - non-chromatin
TGME49_259920	360059	82008.1	69287.4	75017.6	43207.4	32773.4	37861	54589.5	264657	284468	298318	271557	NA
TGME49_239680	401797	342203	262418	264880	203249	117082	88370.9	172923	437682	352427	334739	378270	apicoplast
TGME49_216790	795236	690367	546921	569898	680814	592392	461428	546265	451217	383624	310807	342212	unknown
TGME49_222200	3.52213e+06	55510.3	38613	44805.6	3.06805e+06	156493	154060	147868	2.90067e+06	610370	561425	567696	PM - integral
TGME49_248700	1.48622e+06	473879	2.9392e+06	564017	462154	176411	178240	269305	170376	77332.9	92409.8	114653	IMC
TGME49_265520	264822	172358	220738	203027	429522	278768	370537	363933	460155	394765	453033	398338	cytosol
TGME49_267775	307014	193119	145610	190427	182814	124094	95741.6	129837	721466	588986	534053	588720	mitochondrion - soluble
TGME49_320020	309835	269304	283350	283070	390394	323715	368101	393887	623407	609343	638044	608830	PM - integral
TGME49_278990	760886	478970	481532	485018	1.23681e+06	959260	720253	1.14911e+06	976014	807744	699542	882127	mitochondrion - membranes
TGME49_262050	2.04727e+06	1.75723e+06	2.06613e+06	1.87773e+06	1.3494e+06	1.35076e+06	1.30879e+06	1.53148e+06	1.17094e+06	1.29481e+06	1.49774e+06	1.42893e+06	rhoptries 2
TGME49_271470	144213	131611	107247	113014	105895	101743	78852.5	109012	157296	150095	171677	149147	apicoplast
TGME49_316340	152328	92316.1	640891	110014	1914.98	1931.21	1906.92	4827.48	NA	NA	NA	NA	IMC
TGME49_313670	551594	449691	477810	444727	588462	493998	506728	580542	295535	291487	299748	277424	unknown
TGME49_248810	138255	82113.7	87070.3	73375.9	203252	168048	156255	160701	104369	98943.1	85181.5	100327	nucleus - non-chromatin
TGME49_263040	2.68354e+06	2.59773e+06	2.78933e+06	2.23808e+06	4.46365e+06	4.76619e+06	4.47165e+06	4.04938e+06	3.46423e+06	3.6672e+06	2.85957e+06	3.32266e+06	40S ribosome
TGME49_272210	138610	119455	87560.6	97791.2	129896	109355	95900.9	117450	214731	199701	214288	183059	NA
TGME49_315310	1.30254e+06	1.12694e+06	796261	947890	1.81707e+06	1.40492e+06	1.33678e+06	1.59265e+06	1.19088e+06	848531	1.12122e+06	989152	apicoplast
TGME49_254880	277664	212980	231910	216204	50835	39957.9	35818.8	32615.2	23447	24136.9	33028.2	28677.7	rhoptries 2
TGME49_229670	654116	426875	483494	474531	3.10069e+06	2.52262e+06	2.47071e+06	2.81078e+06	1.19719e+06	1.14951e+06	1.1238e+06	1.28413e+06	40S ribosome
TGME49_225150	664081	478545	492829	505418	351481	277596	278822	343121	704797	671906	646364	641500	rhoptries 1
TGME49_309600	317191	300708	268858	316022	291764	278573	272522	336921	360025	419728	321299	354929	dense granules
TGME49_291880	437068	184952	173505	182301	520714	293011	302718	323845	492952	219153	239286	251506	apical 1
TGME49_230960	744265	545988	546681	605824	301685	273599	252174	293614	452179	435581	418703	424262	nucleus - non-chromatin
TGME49_239400	531554	301044	619914	332157	158622	94815.9	85494.8	94054.3	147648	109795	118425	118100	unknown
TGME49_286720	416432	302656	349395	331696	631389	574051	562421	610427	133150	123893	115518	122893	unknown
TGME49_214320	686185	433362	493092	477887	1.21212e+06	856004	870367	982778	1.01735e+06	968588	821684	753109	PM - integral
TGME49_263540	131318	81604.2	85003.3	135291	34162	32498.8	33871.4	24254	15673.5	13194.5	12093.3	14908.2	NA
TGME49_211090	642488	452391	349577	432892	724633	448423	316544	585977	312186	236637	215353	237522	mitochondrion - soluble
TGME49_317720	1.08925e+06	729485	786550	866641	1.99908e+06	1.703e+06	1.96931e+06	1.89487e+06	1.92721e+06	1.84587e+06	1.77905e+06	1.79416e+06	nucleus - non-chromatin
TGME49_219540	432388	356920	368033	385948	337433	265645	240235	251728	168953	160619	145172	121403	cytosol
TGME49_261010	440963	363893	339217	366540	759106	606677	709453	696945	541751	530616	490435	427051	19S proteasome
TGME49_242330	1.00056e+06	855735	972213	804241	1.24075e+06	1.02972e+06	1.0985e+06	964741	781997	834610	695528	733899	40S ribosome
TGME49_251850	159938	116493	130813	115748	NA	NA	NA	NA	39559.8	24820.2	27405.4	25896.3	unknown
TGME49_208790	474838	394482	388172	426131	742378	519800	623731	744331	598532	585423	418662	456697	mitochondrion - membranes
TGME49_249820	108404	96569.4	74108.7	78300.7	588694	446287	264894	565777	525034	464929	529997	466360	apicoplast
TGME49_300650	122937	109181	97796.8	104020	73833.9	83458.4	76271.6	98351.1	215280	204354	238566	202983	NA
TGME49_208340	317733	175279	177567	148780	294310	179076	186146	194357	206238	147657	133503	142154	apical 2
TGME49_297180	102837	49765.5	36701.5	41952.8	245728	158898	152931	165262	33058.7	14794	22160	18952.9	apical 1
TGME49_286630	1.34131e+06	1.08163e+06	1.01682e+06	993160	498483	352801	254306	474220	986453	1.01358e+06	1.26483e+06	921500	unknown
TGME49_240520	585564	468023	401182	458005	615291	446154	353810	569139	806855	702744	797682	724388	apicoplast
TGME49_232780	50278.4	34221.7	52344.6	46351.3	21338.3	20090.6	14635	13502	14331.8	9940.54	9514.03	11321.5	unknown
TGME49_300260	384862	251523	232570	237541	408465	326429	273295	347794	146921	159577	113690	119469	cytosol
TGME49_205380	307271	219698	233072	216997	323935	260755	259183	293444	712151	574110	606074	575318	unknown
TGME49_202390	80849	62602.2	55254.2	59817.3	295072	223261	265408	263107	94572.2	95941.7	87267.5	86458.8	unknown
TGME49_304670	340152	248902	767963	282035	304667	235185	235699	262555	222396	194862	187283	179816	IMC
TGME49_306220	498608	231878	329600	272200	78338	61221.7	24536.2	34725.3	NA	NA	NA	NA	unknown
TGME49_248390	3.62805e+06	2.86634e+06	3.22697e+06	3.00378e+06	1.58338e+06	1.28625e+06	1.27936e+06	1.33558e+06	2.84884e+06	2.66203e+06	2.73088e+06	2.7715e+06	60S ribosome
TGME49_310030	629486	388621	392998	450001	443000	320176	346796	350753	273283	273232	221707	251672	unknown
TGME49_224490	17454.8	14267.5	9103.47	11841.1	172814	121594	103812	103587	323980	263018	239299	296249	mitochondrion - soluble
TGME49_312050	799157	574761	678885	631566	800560	563953	522863	650001	760938	724712	708795	671474	unknown
TGME49_240650	386084	232780	223402	312215	504999	416662	455129	375307	398227	387971	294340	303808	unknown
TGME49_258740	61693.4	42122.3	46000.3	48821.7	174930	149007	169204	177107	56799.3	60304.7	59411.6	53907.9	unknown
TGME49_215260	469868	295617	373190	352535	177474	137835	190860	185991	107941	110753	128374	120456	cytosol
TGME49_290620	80955.6	46737.3	56984.9	49955.6	5391.48	4645.75	3790.79	5899.97	NA	NA	NA	NA	nucleus - chromatin
TGME49_286600	813765	392898	991152	472964	149654	83883.9	92233.9	85824.3	55224.7	27015.6	46644.6	37606.2	tubulin cytoskeleton
TGME49_259660	96439.6	77073	94711.6	106405	135141	164738	182327	195261	200100	194676	219571	216035	cytosol
TGME49_243910	176520	113558	95629.2	120533	268034	175052	148182	199909	496465	336126	323437	391860	cytosol
TGME49_218720	192897	98845.7	79089.2	108703	262166	171223	164884	186243	NA	NA	NA	NA	unknown
TGME49_269980	3.08872e+06	2.2432e+06	2.59689e+06	2.5168e+06	3.73022e+06	3.07857e+06	3.30458e+06	3.15322e+06	3.52605e+06	3.28098e+06	3.04147e+06	3.06364e+06	ER
TGME49_307610	59342.9	38759.4	33374.5	33498.2	140478	114289	112529	128905	188345	130110	150951	127661	apicoplast
TGME49_233890	562181	393245	290927	349256	419536	227534	122105	251369	305545	230629	174318	226165	mitochondrion - membranes
TGME49_217510	783357	557242	2.12018e+06	568974	353797	280157	232253	303676	413847	342696	396343	397216	IMC
TGME49_229010	484369	281703	312011	307724	708842	483650	459638	539922	456503	462066	414961	411576	rhoptries 1
TGME49_222860	700544	508100	431494	540548	943408	729908	853746	947793	663909	625499	553956	467143	nucleus - non-chromatin
TGME49_262730	380634	295603	299849	285456	64506.6	46283.6	53805.3	63700.7	340995	325278	289376	302192	rhoptries 1
TGME49_232350	567272	263442	321250	260527	508028	489295	507041	424440	396392	390535	335234	302434	cytosol
TGME49_221380	1.15028e+06	920188	1.03109e+06	995775	584693	501484	574681	535339	1.4228e+06	1.23035e+06	1.29268e+06	981401	nucleus - non-chromatin
TGME49_226710	288852	182971	215904	236597	329642	237655	284291	238495	310038	301165	241046	269848	ER
TGME49_268200	187781	93489	107401	116744	87994.7	56880.9	40326.5	49296.1	114769	92780.9	86269.1	87652.6	nucleus - non-chromatin
TGME49_255190	143510	115443	85498.4	114204	572801	451159	416953	479283	121626	93931.8	74071.9	78432	unknown
TGME49_248880	500750	405637	327691	362032	544361	480641	420156	438214	406343	339438	276984	337320	unknown
TGME49_309820	623635	549935	624143	549692	1.78471e+06	1.53696e+06	1.67077e+06	1.5927e+06	1.18611e+06	1.08932e+06	1.20756e+06	1.0758e+06	40S ribosome
TGME49_273560	150048	104972	157603	94959	26966.3	35417	33097.5	23851.7	101361	85693.9	77126.3	78500	unknown
TGME49_315620	488304	341120	426083	375480	454158	307417	349379	332549	407897	405654	334193	369209	unknown
TGME49_218280	233334	195208	152935	185319	388094	337534	261453	355249	112722	126837	70345.8	93209	mitochondrion - membranes
TGME49_227990	259517	208579	145992	185929	182417	111601	79174.3	163361	445579	349233	287221	329301	mitochondrion - soluble
TGME49_318400	113250	97811.5	79120.5	96316.3	131674	87948.1	75935.7	98185.6	289343	272442	231083	266937	mitochondrion - soluble
TGME49_223500	41178.5	28946.7	14932.1	24533.4	77884.2	40576.5	38059.5	55378.1	100890	92177	77743.3	87169.6	mitochondrion - soluble
TGME49_236560	116970	64731.2	49875.6	94819	NA	NA	NA	NA	NA	NA	NA	NA	nucleus - chromatin
TGME49_306030	530791	358582	490680	366551	549290	369944	351198	419571	574097	428305	421026	463437	ER
TGME49_248860	664289	564310	426337	546697	1.08782e+06	745686	637044	820531	598568	397365	490949	442192	apicoplast
TGME49_227030	1.39504e+06	1.16119e+06	1.41214e+06	1.28137e+06	1.43844e+06	1.55436e+06	1.68709e+06	1.63973e+06	1.13242e+06	1.12692e+06	1.24474e+06	1.15052e+06	nucleus - chromatin
TGME49_261210	188837	136706	133979	156462	349690	269877	328023	353701	216937	215566	203694	179739	19S proteasome
TGME49_261030	454017	281893	244264	270054	576645	361901	252726	463594	143520	110169	90670.1	121670	mitochondrion - soluble
TGME49_310670	260538	201052	211158	189509	273777	288922	306317	208726	260339	214330	183721	220195	cytosol
TGME49_271935	192689	94805.3	936674	122326	107767	73812.7	62585.8	82430	NA	NA	NA	NA	IMC
TGME49_249990	161240	201494	188124	207852	9965.15	8588.38	15794.6	16389.2	219680	258118	187360	198584	dense granules
TGME49_268830	50850.7	25023.2	16367.9	24983.4	573503	432130	320996	457898	118083	96399.3	87656.1	88487	mitochondrion - membranes
TGME49_246530	50321	34678.1	25309.2	28397.9	65205.6	37760.7	29689.3	47628.5	99730	70942.8	66400.6	74452	unknown
TGME49_267400	3.88723e+06	3.29121e+06	3.17417e+06	3.01405e+06	5.42413e+06	4.50586e+06	4.36071e+06	4.41139e+06	3.62736e+06	3.44765e+06	3.10354e+06	3.32305e+06	60S ribosome
TGME49_201700	171997	134740	87837.4	168859	170292	123006	142664	142292	184964	162546	131459	120712	nucleus - non-chromatin
TGME49_320592	77909.7	38737.1	35267.5	49846.9	134279	110603	94795	106602	55590.4	38330.1	43811.1	32558	unknown
TGME49_251690	263496	173525	166446	135707	332848	229084	251236	258180	194566	155189	143301	164417	cytosol
TGME49_271240	93311.2	52867.7	41959.5	55103.6	139750	83395	74592.1	92272	329004	254566	271983	219738	NA
TGME49_270910	365732	235546	152406	227412	62776.3	47822.6	29652.5	66711.1	207040	177134	196991	207637	apicoplast
TGME49_320220	72460.8	68386.5	60424.1	76879.2	865488	533462	424097	654373	712781	594326	477035	591247	mitochondrion - membranes
TGME49_229950	326557	269826	264734	313812	252388	211093	221077	259415	172094	166151	163770	137032	19S proteasome
TGME49_205160	75377.7	62833.4	45679.6	52672.6	89259.8	82946.1	58808.8	93431.7	124385	113019	137584	113397	unknown
TGME49_267370	159520	74045.2	73994	84851.4	566194	307982	305139	302776	221329	102434	133724	124342	apical 1
TGME49_264200	33884.1	24402.4	29332.3	28406.5	112160	94598.8	86359.7	118767	299124	311860	354388	310793	apicoplast
TGME49_249250	563295	465066	560113	494188	649824	581938	573721	606029	2.25848e+06	2.28745e+06	2.01046e+06	2.01894e+06	60S ribosome
TGME49_234250	196960	88531.8	93665.4	97453.5	288908	201398	194563	214533	274997	202114	231393	232666	unknown
TGME49_300621	334465	335530	336730	295845	259136	226073	211444	267715	861918	856917	937573	856135	NA
TGME49_250050	86271.1	75795.6	51678.5	55954.4	170846	124232	106834	162490	93121.7	74845.1	80964.9	74261.6	NA
TGME49_232130	420747	382092	292337	421922	456111	472715	514629	455416	722845	831780	620220	768392	tubulin cytoskeleton
TGME49_298040	96602.1	76711.2	60656	56391	66983	71519.6	59255.9	83518.8	296473	266834	302811	252642	NA
TGME49_223050	2.12373e+06	1.84001e+06	2.05618e+06	1.87422e+06	2.75644e+06	2.4073e+06	2.60749e+06	2.56035e+06	2.32253e+06	2.54123e+06	3.0406e+06	2.51421e+06	unknown
TGME49_247460	314229	230796	233587	221454	197854	121571	132653	161910	163388	140607	153018	123671	cytosol
TGME49_214090	19337.2	3991.48	7162.78	15481.5	95424.2	68616	80407.8	102145	160811	80761.8	91131.7	71724.3	nucleus - non-chromatin
TGME49_289530	874586	644932	799072	695719	3.18e+06	2.35556e+06	2.79209e+06	2.77432e+06	2.32837e+06	1.87792e+06	1.93469e+06	1.83833e+06	60S ribosome
TGME49_228150	63426.7	36100.6	28560.1	32320.8	41836.5	27145.3	20063.5	22676.8	NA	NA	NA	NA	unknown
TGME49_213010	112336	75618.9	76904.3	88156.8	204775	148346	106920	174248	188763	147615	143787	158452	apicoplast
TGME49_206690	109941	71601.5	242888	78712.3	349751	253697	222116	240180	88008.7	83897.5	100619	95332.1	IMC
TGME49_292950	66641.3	31099	40862.9	35838.8	NA	NA	NA	NA	NA	NA	NA	NA	apical 1
TGME49_300660	85061.1	78775.7	69721.5	65985.8	135207	109046	101152	131571	308123	280418	325825	287246	NA
TGME49_257500	44027.5	36108	20017.2	31622.2	12401.8	8464.32	6644.35	13187.1	48749.4	46139	41421.2	38553.1	unknown
TGME49_290200	54811.5	54341.7	40514.3	46053.3	62145	50272.6	49636.1	46598.3	7438.86	14994.5	21530.4	11249.1	unknown
TGME49_225020	479168	185220	158813	188416	113573	60315.5	59828.7	70991.8	73150.4	48426.3	53336.4	55537.2	apical 1
TGME49_204480	389324	301814	346145	309192	291671	232667	254657	256136	453441	379076	391413	340632	unknown
TGME49_288860	179039	136229	131581	153201	226307	224992	209418	207540	114332	114982	110086	94815.3	unknown
TGME49_205250	563802	231382	281842	271751	382774	239463	186723	267737	337939	189267	195939	218318	rhoptries 1
TGME49_310490	2.14945e+06	1.76513e+06	2.72777e+06	1.85298e+06	3.51911e+06	3.16507e+06	3.0493e+06	2.75591e+06	3.78538e+06	3.19752e+06	2.91966e+06	3.17084e+06	60S ribosome
TGME49_232410	490294	224946	579607	214709	288524	233141	208481	228657	177394	154152	196661	154104	tubulin cytoskeleton
TGME49_279100	125900	86706.8	103437	85765.4	16046.4	17093.1	13755.5	10956.2	112500	103470	87144.7	103984	dense granules
TGME49_203540	88452.3	42485.8	57297.5	67253.4	12829.5	11835.2	10755	7460.91	NA	NA	NA	NA	unknown
TGME49_258580	1.33286e+06	951324	1.38169e+06	890746	697677	478602	488307	500699	1.533e+06	1.00769e+06	1.05862e+06	1.11516e+06	rhoptries 1
TGME49_233460	185786	56954.9	51366.5	37704.7	521690	473023	425134	451959	169014	161370	107517	124526	PM - peripheral 1
TGME49_275670	77728.6	38655.6	47277.8	46016.3	226491	152440	120351	181012	22652.6	7548.47	12502.2	7053.57	apical 1
TGME49_307570	58251	54804.3	42052	42391.3	108404	103388	89501.6	115247	183526	175144	166477	151923	unknown
TGME49_286030	4339	7597.17	4113.03	3416.05	26398.7	1335.26	1095.46	10069.1	NA	NA	NA	NA	nucleus - chromatin
TGME49_285830	66079.9	60725.6	45134.2	47733.9	52680.8	39503.8	25619.1	55309	206007	153360	179943	184024	apicoplast
TGME49_282040	84931	49142.4	46312.5	45669.5	108123	67834.8	91193.1	90375.8	89081.2	67618.6	70780.2	69175.9	NA
TGME49_270770	49843.6	37579.5	29082.5	42781.6	27423.5	14835.5	13882.7	15106.5	NA	NA	NA	NA	unknown
TGME49_210370	265733	182316	202513	203040	NA	NA	NA	NA	102985	105324	84311.2	98647.7	rhoptries 1
TGME49_291680	116438	59809.8	61962.7	73521.4	95511	66058.7	62612.5	75230.7	102117	98367.4	100183	91230.7	nucleus - non-chromatin
TGME49_290660	528034	252970	257748	264256	390245	321542	305546	310920	445601	306198	306826	265676	nucleus - non-chromatin
TGME49_286240	46379.6	33901.4	24958.5	30631.1	NA	NA	NA	NA	NA	NA	NA	NA	unknown
TGME49_270240	120521	88955.6	97054	90911.9	138563	116997	84400	110018	268172	264008	257511	272823	dense granules
TGME49_255160	264426	123086	159074	128088	246715	190902	174165	183140	130251	100219	99725.3	112755	apical 1
TGME49_266070	912874	661254	764282	677663	1.0986e+06	938523	969978	889350	1.0228e+06	1.01548e+06	902679	948505	60S ribosome
TGME49_222020	528616	465415	451010	475391	459433	360284	309279	420897	180035	194525	188643	175288	apicoplast
TGME49_270150	375325	233010	248639	230329	388563	298097	215453	272301	443835	305819	328950	324082	mitochondrion - soluble
TGME49_220860	65776.4	59785.8	45515.7	62410.6	83785.8	58729.3	61857.1	69479.8	14868.2	16149.2	18020.5	14950.3	nucleus - chromatin
TGME49_243490	245264	174815	139366	164558	371134	255161	187476	307792	250632	222722	176163	218890	mitochondrion - membranes
TGME49_293680	80736.8	72794.6	57699.2	61295.9	225364	199149	170143	209856	375023	326722	383546	363853	apicoplast
TGME49_261460	380998	327504	298450	310891	683365	469491	580208	602343	380954	362670	310123	295232	unknown
TGME49_211670	137713	101468	82546.1	116668	259213	222031	270810	241027	278649	217891	199751	169901	nucleus - non-chromatin
TGME49_218540	271488	199730	241562	212567	222458	199592	181650	201758	166301	186522	154076	171470	ER
TGME49_235020	155500	136368	100727	142682	268342	188354	219603	208945	48182.3	52546.1	41769.8	33115.1	cytosol
TGME49_295360	199257	131508	348748	133463	80015.5	62443.7	49010.1	83499.9	NA	NA	NA	NA	IMC
TGME49_314810	673545	405983	515702	474194	248909	191126	203540	200972	572093	510823	449303	452623	60S ribosome
TGME49_291350	26958.7	14633.3	8901.54	14253.2	282110	220888	199288	241709	448123	362928	332087	354966	mitochondrion - soluble
TGME49_227810	188578	92692	111377	91014.7	237317	170963	131613	188496	299893	226716	232394	201970	rhoptries 1
TGME49_211680	90767.1	29493.1	38165.6	52837.8	93978.9	82615.3	61627.5	62004	NA	NA	NA	NA	ER 2
TGME49_295125	77062.1	38778.4	35746	47669.7	100598	82103.2	75978.6	80876.6	90653.1	84988	63466.6	68481.6	rhoptries 1
TGME49_209010	3146.11	3397.06	7764.61	2801.9	230607	139643	107328	142331	89006.3	77790	60079.9	80047.6	unknown
TGME49_312110	227308	118123	128730	134314	556724	373780	314693	393959	291720	173234	186463	201211	apicoplast
TGME49_220400	4.37959e+06	4.16067e+06	4.09708e+06	4.01635e+06	3.44331e+06	3.2553e+06	3.0622e+06	2.76361e+06	2.41791e+06	2.59962e+06	2.40873e+06	2.98131e+06	cytosol
TGME49_318560	187282	141199	131336	139327	368599	214514	185898	229939	648673	440013	425577	458800	mitochondrion - soluble
TGME49_291890	28739.1	21233.7	12364	19960.1	134442	154822	173150	129477	58187.7	65078.8	45043.6	44542.6	micronemes
TGME49_306970	55741.3	49586.1	53334.1	43885.1	122115	93312.4	116767	112110	38165.4	45522.6	53173.1	48592.6	cytosol
TGME49_249630	422075	330625	207323	295197	801462	426540	295881	594366	609805	504217	339710	464767	unknown
TGME49_258000	160839	85970.6	71359.9	94647.8	177604	141791	103384	163655	107076	71864.9	69288.7	72548.9	unknown
TGME49_264610	88532.9	55353.7	53355	65132.4	131905	101698	124468	137812	162303	145255	144202	128615	nucleus - non-chromatin
TGME49_274120	263896	117287	150393	124412	270762	121266	117847	120864	262964	114948	134784	127583	NA
TGME49_257300	132864	48629.6	50348.5	43685.5	55009.3	34465.4	28939.9	27280	75099.8	34015.9	28787.9	30224	apical 1
TGME49_256030	533986	292799	240351	297580	171474	99053.8	84474.2	68725.9	608166	346743	399380	339113	apical 1
TGME49_275810	979371	728864	851852	851807	1.05642e+06	850986	1.03719e+06	1.05332e+06	1.04268e+06	1.06366e+06	1.21568e+06	1.03429e+06	unknown
TGME49_238010	908869	705697	668369	696388	1.17799e+06	1.17144e+06	1.01841e+06	958511	831708	856460	560857	663127	60S ribosome
TGME49_262690	384279	251642	301624	220196	641663	450672	432384	450018	475979	456741	325852	370332	60S ribosome
TGME49_320440	63079.6	56056.1	42396.7	46275.5	110739	101219	65297.2	123138	199956	172596	217608	186585	unknown
TGME49_232230	91035.4	88407.3	67918.9	75205.6	587175	477542	486419	451040	588912	545969	394919	418108	60S ribosome
TGME49_226830	217067	128383	122071	124285	358130	220757	239055	217921	NA	NA	NA	NA	ER 2
TGME49_218410	464156	316060	193257	293969	721891	579405	758527	568635	340231	338352	230612	234846	60S ribosome
TGME49_305340	30026	24507.1	15691.1	24896.8	31832.1	24927.8	26524.5	21933.5	47411.6	48782.4	35223	37259	nucleus - chromatin
TGME49_221330	345707	279742	227593	267637	259442	195892	166320	231798	378370	301230	373478	326863	apicoplast
TGME49_209720	83217.3	44778	53336.8	48789.1	7872.41	5645.79	3489.94	15720.9	5058.57	3754.88	8326.64	7346.76	mitochondrion - membranes
TGME49_204130	9465.6	4736.46	3108.17	5624.04	161417	130602	170109	160547	31843.8	30636.9	22480.8	19703.1	micronemes
TGME49_313270	21427.4	18371.7	16520.3	25581.2	8714.88	6373.84	5427.97	7341.45	1432.87	1338.26	2458.9	1488.88	nucleus - chromatin
TGME49_230940	46517.9	27790.8	32304.3	25265.6	132551	106945	98931	105864	14140	12323.9	12361.4	10924.8	unknown
TGME49_237560	71227.9	52660.2	45108	48423.8	337729	205986	136882	220988	116191	94026.2	76378.7	96032.9	mitochondrion - soluble
TGME49_274190	20337.6	13948.1	14347.6	9589.05	5517.05	6032.9	4625.82	6983.72	88665	86035.9	79434.4	63440.4	cytosol
TGME49_217680	66556.3	50598.9	50440.6	64239.1	7818.85	10729.9	11891.1	16014.2	53255.9	80476.6	59626.5	54185.6	dense granules
TGME49_269460	33553.8	10582.8	18725.5	18922.1	66887.7	45089.1	45365.5	46732.1	23870.7	9379.27	13744.2	13443.8	unknown
TGME49_297940	167108	117392	124936	117590	980406	801568	723784	1.022e+06	430979	317846	339057	333081	apicoplast
TGME49_209210	239119	173630	203062	166625	192675	143403	151480	166207	168831	149106	133524	139273	unknown
TGME49_314270	50372.5	31983.8	30054.9	32345.6	225038	117405	102042	139669	202119	182757	168433	184537	unknown
TGME49_256970	74077.9	41203.2	42449.1	37614.1	183056	121013	156342	176311	68886	56732	52133.5	52373.7	unknown
TGME49_225270	3258.93	2824.16	2472.43	5157.61	10699.9	8253.64	11479	9213.43	7470.34	6403.93	4323.92	4283.28	NA
TGME49_244460	11630	7913.42	8519.03	7810.45	17646.3	8865.88	11165.1	10974	3453.89	2932.77	4677.91	2714.2	unknown
TGME49_228290	1.14437e+06	980936	911317	955253	1.82724e+06	1.42027e+06	1.19999e+06	1.71576e+06	512949	423991	370652	418177	cytosol
TGME49_254440	72745.3	49412.8	31158	62427	266511	239239	275528	264558	123047	101120	79833.9	82591.2	60S ribosome
TGME49_218820	1.36405e+06	1.18719e+06	1.41075e+06	1.26531e+06	1.53324e+06	1.36504e+06	1.54315e+06	1.60213e+06	1.05338e+06	1.00846e+06	1.03398e+06	935310	nucleus - non-chromatin
TGME49_216630	404277	374473	296172	294909	270062	195489	157392	292920	573285	521725	527441	549175	apicoplast
TGME49_315510	185349	102937	83969.9	88006.5	537309	340659	311899	332775	219152	108467	111100	108613	apical 1
TGME49_273960	128181	105216	106736	101188	321102	337424	282438	347296	266673	260787	319330	309797	apicoplast
TGME49_290900	364081	248265	205301	246706	245008	144792	110822	205723	738498	592264	561325	642538	mitochondrion - soluble
TGME49_227830	424843	219037	215136	238746	118337	62108.3	43489.9	76444.7	235175	148864	113697	148403	mitochondrion - soluble
TGME49_263120	198839	190404	162111	178456	113791	111138	82032	107485	307282	293822	309802	291113	NA
TGME49_212930	439062	347721	290564	309258	23440.8	14986.7	12739	18416.5	61877.7	43423	38431.4	35286.2	mitochondrion - soluble
TGME49_285680	125014	106425	87229.9	76714.1	88769.4	87608.2	47071.5	81553	99881.6	76353.7	80599.5	98498.7	mitochondrion - soluble
TGME49_235930	516923	373412	404526	366427	668626	497700	568164	562847	814222	781805	643947	597729	nucleus - non-chromatin
TGME49_215060	662196	498513	556556	486879	1.19443e+06	1.00714e+06	1.03023e+06	913407	933116	828257	840018	745188	nucleus - chromatin
TGME49_204410	146497	88534.7	88672	94444.4	132192	80589.6	60007.1	95270.7	96765	76115.3	78680.5	72367.9	unknown
TGME49_231370	246441	39944.2	32255	39662.9	230953	11994.9	11316	19397.9	280868	62847.1	63771.3	56521.9	apicoplast
TGME49_242780	296952	34818.3	31945.7	44291.5	472195	107533	73807.2	115337	181532	17192	13673.8	17566.7	unknown
TGME49_200280	181496	130840	98589.1	119031	NA	NA	NA	NA	NA	NA	NA	NA	nucleus - chromatin
TGME49_202370	222291	190247	209452	172385	166525	144671	129663	153658	91049.5	81168.3	86557.7	75244	cytosol
TGME49_270380	1.32218e+06	1.00714e+06	1.21214e+06	1.10591e+06	1.02707e+06	843870	941666	1.02319e+06	986099	1.01801e+06	985998	810040	40S ribosome
TGME49_258870	276275	167894	166493	192460	238331	174625	146480	181497	192584	166260	146449	162310	dense granules
TGME49_313700	227470	152773	128677	147009	396501	282347	213064	311975	470192	372786	293095	371650	mitochondrion - soluble
TGME49_285210	71342.1	56779	63728.9	76312.4	37840.1	27034.4	23345.8	28535.6	12328.5	9370.75	9851.93	11047.6	NA
TGME49_231150	276616	173547	166331	182203	441852	219283	167148	329355	56880	46103.5	35560.3	40575.6	unknown
TGME49_214150	73963.2	49644.5	43813.3	51326.8	74194.8	70365	43453	69499	NA	NA	NA	NA	mitochondrion - membranes
TGME49_220950	462396	456776	478069	471087	522486	499378	419504	496562	438178	593336	425526	555394	dense granules
TGME49_217790	23025	14754.1	14754	14062.1	29160.7	23428.3	17673	26262	35898.2	32162.5	37809.8	32360.3	NA
TGME49_240810	164260	122569	137348	119981	292441	235525	269677	261794	270399	235509	236869	221334	PM - integral
TGME49_244320	1.59297e+06	1.31121e+06	1.49422e+06	1.29037e+06	1.35092e+06	1.20637e+06	963089	1.11653e+06	1.67862e+06	1.35901e+06	1.44033e+06	1.54521e+06	60S ribosome
TGME49_213350	1.49947e+06	1.1512e+06	1.47599e+06	1.32164e+06	1.59346e+06	982736	1.26322e+06	1.03068e+06	1.27493e+06	1.32916e+06	1.35735e+06	1.27478e+06	40S ribosome
TGME49_215280	287641	212968	144324	185571	198770	110829	69942	140824	224983	208359	156442	197732	mitochondrion - membranes
TGME49_226430	891595	642310	693691	672904	198708	130696	152248	155314	195566	160847	156774	141712	ER
TGME49_231480	49493.7	27154.8	34176.5	38146.9	25207.9	16261.5	16810.6	19563.6	25429.9	25065.4	30124.1	23497.6	cytosol
TGME49_219270	715763	353208	1.00365e+06	426758	671929	367172	467277	445989	841943	572633	585484	623700	IMC
TGME49_258470	72503	39679.5	115818	78160.3	2939.14	2755.95	629.271	5354.19	104836	117280	152376	106881	IMC
TGME49_311400	123585	61934.1	78512.4	73619.1	NA	NA	NA	NA	8450.03	8431.92	8004.52	5883.94	nucleus - non-chromatin
TGME49_289770	335760	183022	215936	214237	432351	303108	345623	352010	368312	365783	364343	345111	nucleus - chromatin
TGME49_229250	401668	265009	297172	296162	759111	518322	640036	647619	822936	645662	753220	623834	60S ribosome
TGME49_230860	59156.9	31427.1	26729.2	33192.8	NA	NA	NA	NA	NA	NA	NA	NA	unknown
TGME49_259630	517172	320855	946118	324204	380570	259995	269428	309548	NA	NA	NA	NA	IMC
TGME49_267080	321847	258549	262003	226872	125275	102666	97353.8	100235	37128.8	31228.1	33607.6	29769.2	19S proteasome
TGME49_239760	516085	400288	484418	442183	890479	672810	805115	760740	181531	184087	191098	156786	60S ribosome
TGME49_243570	257518	262602	220645	200065	875239	769004	769033	762736	728556	642858	559040	575190	40S ribosome
TGME49_203310	NA	NA	NA	NA	132412	116426	90672.2	104922	30408	31078.9	23351.6	27452.8	dense granules
TGME49_201210	25386	14318.8	12671.1	19417.3	265499	168192	123378	155441	108683	79607.6	79852.3	71702.8	unknown
TGME49_226220	1414.35	NA	5868.36	1585.85	16072.1	1103.4	NA	5583.45	19350.1	12370.9	10777.1	13601.3	unknown
TGME49_255880	231639	186245	164314	169820	NA	NA	NA	NA	NA	NA	NA	NA	nucleus - chromatin
TGME49_301440	512083	225824	271638	297082	37755.7	39667.2	42506.4	34878.9	NA	NA	NA	NA	nucleus - chromatin
TGME49_277500	57610.6	41803.7	40051.9	45436.8	64290.2	39892.4	63539.2	61343.7	47074.9	44539.7	45198	39986.3	19S proteasome
TGME49_220100	220052	196002	154382	179575	154773	115733	107803	120140	115717	116182	86390.3	101450	mitochondrion - soluble
TGME49_304740	39760.7	47790	62208.5	51811.4	115397	165933	129963	164659	73854	139449	143636	133882	dense granules
TGME49_320100	NA	NA	NA	NA	51952.6	38123.8	38054.7	38267	33315	30291.5	34975	30064.4	nucleus - non-chromatin
TGME49_251870	2.52539e+06	1.2815e+06	3.0134e+07	978861	1.0069e+06	1.01972e+06	719556	729989	1.29435e+06	1.17082e+06	799276	1.01801e+06	nucleus - chromatin
TGME49_230410	840498	572401	463026	601544	1.10432e+06	657939	506227	999573	833190	779863	618941	791583	mitochondrion - soluble
TGME49_313100	51543.6	36437.9	39389.8	33793.2	54926.3	41158.9	48910.8	44795.6	61246.5	55022.8	61927.1	43611	nucleus - chromatin
TGME49_305020	183613	149465	117387	120754	63043.2	56632.6	37589.9	65245.5	167228	134836	154788	162137	NA
TGME49_289750	290152	142500	234989	166650	499695	287276	233176	283137	407048	323130	225311	254907	unknown
TGME49_256760	71325.8	44394.1	44110.9	51149.3	266563	245636	242466	229791	96480.2	100581	73014.7	62446.6	cytosol
TGME49_236570	77310.5	62861.5	59248.1	56141.8	86694.7	72173	69064.7	78554.8	62829.3	61474.3	59938.4	59902.9	cytosol
TGME49_280610	164743	127789	129137	125939	12265.9	12559.8	12958.8	15375.7	95799	94927.1	109656	94107.6	ER
TGME49_301380	105934	101069	89026.5	90278.3	161282	120166	106433	153547	93154.6	77088.5	78432.4	77103.1	apicoplast
TGME49_225080	401343	288380	242690	223188	352310	311878	308027	294460	149558	149991	123573	127089	40S ribosome
TGME49_318510	287812	192359	213373	208431	381590	307268	313918	299361	91510.7	86426.9	87601.2	71514.6	nucleus - chromatin
TGME49_251930	134769	98963.6	83725.2	92896.3	41606	36784.1	31149	41416.7	32460.5	26144.4	28353.9	26033.4	apicoplast
TGME49_220930	290814	197332	225285	211257	214656	125549	146987	142674	195465	148310	152834	142125	IMC
TGME49_260800	44953.5	35719.8	30249.8	33325.9	34331.9	15982.5	16200.5	22369.5	95800.3	90873.6	108059	106705	unknown
TGME49_288360	304100	104798	79650	68396.4	430142	288732	278361	218977	NA	NA	NA	NA	cytosol
TGME49_216260	154787	121188	129988	138628	160506	111215	158829	171497	127973	120761	124981	124377	unknown
TGME49_240430	NA	1194.08	NA	952.976	9645.26	6882.02	6406.46	6374.65	5930.14	9893.24	8879.37	8909.2	apicoplast
TGME49_305190	31842.1	9777.5	12054.8	9496.23	36137.7	24951.8	23672.8	23174.9	NA	NA	NA	NA	unknown
TGME49_301420	189722	75488.6	83883.2	75126.9	100323	41198.6	37506.7	54428.5	30493.6	13408.3	17136.5	13781.8	apical 1
TGME49_260440	1.08532e+06	833066	705177	767750	714881	657909	614048	597706	388705	406944	302238	352574	cytosol
TGME49_233020	145733	100205	96079.8	102315	71666.2	52223.6	56263.9	54017	90565	81725.8	72831.6	72334.8	unknown
TGME49_231970	125203	75886	79116.3	76341.1	150700	100313	115476	86614.3	91363.5	51625.4	62867.9	57873	nucleus - non-chromatin
TGME49_263750	91711.8	44956.5	39945.8	48994.5	140170	96977.3	93285.7	102068	136643	103082	89393.8	109182	mitochondrion - membranes
TGME49_216530	111380	93806.4	59980.3	88803.1	105294	65758.5	59828.9	93078	28801.5	21348.2	16344.6	23521	mitochondrion - soluble
TGME49_318410	373241	242707	235429	254505	266922	242771	249744	260561	284863	301079	327044	276207	cytosol
TGME49_321500	333754	155277	166783	162677	284934	133496	121846	178652	206989	130296	124916	130318	nucleus - non-chromatin
TGME49_285850	118153	69727.7	58784.6	80738.5	5447.66	5963.72	5575.06	4466.7	86790.9	76167.4	68114.5	72768.1	nucleus - non-chromatin
TGME49_271888	452903	382162	534839	390977	144190	119066	126438	140779	117264	131459	117067	116208	ER
TGME49_300611	11247	13979.3	12820.7	13227.7	139854	119336	96781.9	124075	327313	334224	403068	366997	NA
TGME49_246550	76579.5	49401	51631.3	53894.5	54576.7	53377.2	42900.2	45750.2	528210	507155	639719	556881	rhoptries 2
TGME49_227960	208227	152132	169249	154048	75659.6	68350.1	75182.9	90563.1	NA	NA	NA	NA	19S proteasome
TGME49_292975	NA	NA	NA	NA	39068.3	24632.6	16769.3	23053.7	11752.9	11833.5	7802.62	13438.1	mitochondrion - soluble
TGME49_212220	41161.5	25077.6	29401.4	29924.4	14885.3	11930.3	11220.3	13226.6	68511.7	52554.1	75726.5	64018	nucleus - non-chromatin
TGME49_279390	113862	91824.6	79008.8	59465.4	274426	234917	184835	191214	356292	313204	375331	354884	nucleus - non-chromatin
TGME49_297270	35761.1	20956.1	14997.7	23065.7	228329	205490	208446	204069	184211	151205	160604	157212	NA
TGME49_229740	119733	69111.3	54480.3	69500.4	27700	14927.2	10944.5	16978.8	107132	83550.5	82288.7	84999.9	mitochondrion - soluble
TGME49_230050	338159	203865	154597	181358	164018	94288.7	66961.7	99700	215856	178979	183171	186622	mitochondrion - soluble
TGME49_264720	53349.3	52120.9	39620	56855.5	160973	141427	99257.1	165098	130530	123068	130002	147844	apicoplast
TGME49_206510	119689	69172	74667.8	63559.9	37459.7	47396.8	38760.6	47328.6	35824.9	42970.6	37772	37386.3	micronemes
TGME49_300030	250448	148043	119427	142461	495173	269802	219374	335381	395437	303228	295488	240202	mitochondrion - soluble
TGME49_204050	159017	112456	110148	131923	49604.7	44080.9	54908.6	48752.3	63995.6	73464	59259.1	58343.1	micronemes
TGME49_263500	181241	132896	142642	131874	299307	224368	269431	226308	156131	157102	134081	135188	unknown
TGME49_294190	377233	261617	173824	236284	162341	110346	74908.5	117317	367937	299003	264008	294065	mitochondrion - soluble
TGME49_207630	76060.6	52738.6	37900.3	43019.8	11373.4	7873.97	5462.06	6531.7	46727.9	38557	44053.7	40066.8	apicoplast
TGME49_261250	669696	288954	8.5446e+06	296801	32950.6	25858.5	25381.8	19404.6	NA	NA	NA	NA	unknown
TGME49_284010	NA	NA	NA	NA	6288.6	6446.23	1491.25	5226.41	15768.1	19419.1	19481.4	18755.7	NA
TGME49_319550	35338.4	21516.2	18853.1	25170.5	NA	NA	NA	NA	40707.6	38654.5	43000.6	40025.1	ER
TGME49_313400	53690.7	32851.5	33004	32814.6	NA	NA	NA	NA	30834.7	20708.1	21129	24120	nucleus - chromatin
TGME49_315640	189321	133778	104111	120540	172058	156048	93139.8	150939	103782	81798.5	103130	84255	NA
TGME49_315230	11926.1	7809.06	6084.07	6642.25	167272	92292.2	78095.1	134627	136917	106196	66943.7	100502	mitochondrion - soluble
TGME49_215920	78139.2	50297.9	32395.3	46108	35585.3	20254.5	17232.7	13243.2	25453.4	15843.1	15179.7	19643	mitochondrion - soluble
TGME49_266730	47430.8	35427.5	37959.9	28097.5	NA	NA	NA	NA	140545	110960	140969	124544	NA
TGME49_266080	111164	54871.5	48594	55685.5	143768	55883.5	58664.7	65823.3	108546	73999.4	56949.5	56642.1	apical 1
TGME49_289830	22468.2	14209.4	17458.2	18876.8	172535	154722	144308	153746	308629	292063	281301	234303	nucleus - non-chromatin
TGME49_246978	176751	165051	132954	140835	186292	163781	116246	193840	222575	176360	246295	212917	NA
TGME49_267480	53410.3	36804.2	32393.2	43301.6	NA	NA	1550.08	993.695	1047.65	1210.49	1358.57	888.457	unknown
TGME49_300601	107402	89629.6	69274.1	88104.1	NA	NA	NA	NA	140934	136550	151431	122893	NA
TGME49_278975	180276	74927.4	129708	102046	NA	NA	NA	NA	NA	NA	NA	NA	unknown
TGME49_209580	NA	NA	NA	NA	24710.7	16005	12549.7	17626.6	28336.4	35391.7	25800.2	30545.8	mitochondrion - soluble
TGME49_255690	841472	688754	497473	605354	345624	255060	182731	327549	476635	385913	441335	436380	apicoplast
TGME49_307040	9531.28	5229.8	4352.56	5193.81	NA	780.228	NA	NA	NA	NA	NA	NA	unknown
TGME49_202530	147403	121201	107845	134160	270062	209833	221712	229453	191978	179071	172555	176524	cytosol
TGME49_243540	31342	16926.1	19307.4	21507.7	250936	188572	179092	206826	84622.7	74567.7	63146.1	65735	nucleus - non-chromatin
TGME49_209910	NA	NA	NA	NA	323760	396748	334892	268018	241904	273325	149690	209544	nucleus - chromatin
TGME49_281620	NA	NA	NA	NA	109654	72127.7	69578.1	88633.9	349093	311429	285964	303209	unknown
TGME49_231080	860023	436591	524489	504554	1.02606e+06	662700	928646	918296	864387	919125	931021	861119	60S ribosome
TGME49_299110	12858.1	3692.93	15404.2	8762.22	NA	NA	NA	NA	NA	NA	NA	NA	ER
TGME49_231120	60274.6	35981.3	35766.4	44855.4	16690.9	9554.28	9123.62	8643.24	13831.5	9190.35	11303.6	9619.45	NA
TGME49_219832	134013	117727	99819.9	109995	19317.1	13860.4	12891.8	15248	58783.9	42645	48975.6	53888.5	NA
TGME49_313780	494337	221259	230866	223320	39900.6	18428.8	16558.8	24046.2	231725	114874	134968	136834	NA
TGME49_251630	8024.89	2887.89	5145.53	5007.62	19187.5	13903.9	12417.3	17138.7	111651	115194	76618.4	92760.1	Golgi
TGME49_204160	63698	39944	44549.9	41595.8	NA	NA	NA	NA	NA	NA	NA	NA	unknown
TGME49_250830	21316.4	18800.6	18916.8	25840.8	NA	NA	NA	NA	NA	3974.38	3331.84	3709.69	19S proteasome
TGME49_233520	95273	75010.6	82161.5	76051.6	93005.8	81341	83473.8	77671.9	21882.3	17411.9	16773.8	16764.7	nucleus - non-chromatin
TGME49_228250	63606	38185.9	26983	41673.9	78264.4	46952.9	33908.8	60295.6	278020	242005	221127	235870	mitochondrion - soluble
TGME49_306260	100119	83485.7	62434.7	68216	53777.5	47013.5	25400.8	49234.6	38703.2	27662.5	36635	28829.4	unknown
TGME49_224540	248247	65381.9	142207	84739.1	88736.7	29810.8	26345.6	36971.8	22107.5	7374.66	15909.7	11262.1	apical 1
TGME49_229990	16035.2	9384.74	11307.1	15215.8	114806	105130	107872	96875.1	6256.68	9218.34	5989.02	3259.58	cytosol
TGME49_290840	177650	118415	89605.3	117461	NA	NA	NA	NA	126341	99632.8	81201.7	91915.8	mitochondrion - soluble
TGME49_234230	7532.38	3704.64	1506.05	3470.88	25291.9	14500.1	16816.8	12867.8	7691.92	4317.86	4047.2	5514.18	nucleus - chromatin
TGME49_295050	150705	114431	80769.4	101636	114623	93510.2	82189.6	98640.6	108061	88641	102581	95854.7	unknown
TGME49_314295	29206.5	17750.5	15922.9	11858.8	24804.8	13475.9	9197.76	19808.9	67343.5	66185.4	64766.5	55536.1	mitochondrion - soluble
TGME49_227290	NA	NA	NA	NA	NA	NA	NA	NA	133328	130240	111739	135666	nucleus - chromatin
TGME49_260320	30386.8	12701.8	15751.5	14301.1	NA	NA	NA	NA	40620.8	31957.8	29514.5	27045.2	nucleus - non-chromatin
TGME49_213600	27373.9	16383.5	11656.5	14233.6	30632	12171.1	12822.2	11580.6	13604	11954.2	12261.4	13291.6	NA
TGME49_209150	89977.8	74823.1	73640.1	67138	12115.1	8159.98	6600.51	10205.2	31366.7	43839.7	23911.6	29938.5	mitochondrion - membranes
TGME49_277000	93786	42967.8	52298.4	50013.5	13401.6	12731.9	13883	14373.7	93858.4	60133.6	65333.3	82978.9	nucleus - chromatin
TGME49_227280	1.4828e+06	847048	889397	915881	1.76015e+06	1.10515e+06	848274	1.21463e+06	1.13557e+06	944856	889755	1.16975e+06	dense granules
TGME49_240830	101969	90346.5	72872.8	78040.2	17154.2	12475.3	9763.77	18612.5	122254	109636	103749	111822	unknown
TGME49_236250	NA	NA	NA	NA	17023.3	7476.31	6718.02	13666.2	113433	114206	109985	98920.5	mitochondrion - soluble
TGME49_228210	32959.1	18105.9	15728.6	22462.5	4492.09	3624.63	2299.1	3557.8	42833.9	28492.2	21943.1	19464.4	19S proteasome
TGME49_227300	NA	NA	NA	NA	30635.7	28091.2	21257.6	31319.4	238364	205419	207932	224018	NA
TGME49_310300	122494	56544.3	66454.7	80988.2	147213	121350	124008	124835	162519	165602	144419	164887	mitochondrion - soluble
TGME49_300631	435310	379442	348980	388652	179683	158086	130598	201914	189212	179634	229602	207472	unknown
TGME49_237460	51644.9	50210.1	40007.8	45753.3	20282.3	16175.3	13022.8	17583.8	86624.6	74756.3	61208.3	75093.2	unknown
TGME49_222000	6316.35	5647.1	6293.24	5087.84	4353.08	1970.54	NA	1823.78	NA	NA	NA	NA	nucleus - non-chromatin
TGME49_254540	5844.93	3720.1	2588.46	3225.13	NA	NA	NA	NA	NA	NA	NA	NA	apicoplast
TGME49_272155	183100	110153	72304.2	136574	NA	NA	NA	NA	NA	NA	NA	NA	NA
TGME49_300680	67200.8	56517.6	44867.8	55513.3	113583	85047.6	75935.7	95485.3	67159.6	68130.9	96079.5	71012.3	unknown
TGME49_239330	344230	269231	261745	219225	418576	428191	337101	294983	331615	272578	178577	244869	60S ribosome
TGME49_268290	162407	108579	85312.4	102546	134781	89430.3	84036.9	104741	518438	407421	382610	420755	mitochondrion - soluble
TGME49_239260	242592	95817.6	2.42739e+06	126225	126626	180401	104332	129469	155611	116943	76000.6	88278.6	nucleus - chromatin
TGME49_259640	NA	NA	NA	NA	21195	18064.6	6330.95	19658.8	21685.4	18762.1	13159.2	17915.6	unknown
TGME49_276130	10007.2	7725.49	7906.18	8098.96	5903.31	4200.49	4683.13	5705.04	34184.7	25373.9	31605.8	30669.3	rhoptries 2
TGME49_290700	35001.9	24089.9	27670.5	23648.9	10418.1	7841.37	7541.2	8077.56	31966.8	41047.7	33395.8	34142.9	dense granules
TGME49_252290	93587.4	52357.5	49139.7	63292.2	149016	131751	133337	128943	22598.2	26365.8	23924.8	27637.5	unknown
TGME49_297810	56837.1	34264.3	32497	33916.1	19330.5	10261.3	11848.1	11173.5	219460	182605	172196	206626	mitochondrion - membranes
TGME49_276210	114210	78315	60700.6	78407.3	132585	76005.7	56407.7	92957.4	194954	168413	159053	162426	unknown
TGME49_262640	110157	71665.3	56423.8	64295.8	289125	192524	147441	256297	157106	163323	114571	164005	mitochondrion - membranes
TGME49_270090	32867.1	22622.5	25961.4	21111.5	25780.4	14309.5	9312.15	12610.3	18555.6	13254	13601.5	14510.6	unknown
TGME49_216590	10976.8	5577.11	7262.94	6785.22	NA	NA	1119	1169.18	205553	192886	234784	195023	unknown
TGME49_244100	NA	NA	NA	NA	13285.6	10528.9	27249.2	12097.7	334625	353140	280499	302377	nucleus - non-chromatin
TGME49_232150	20038.8	11963.8	14971.8	14103.9	27115	40901.7	16902.6	28425.3	23633.4	18701	21219.2	19634	unknown
TGME49_202540	109203	16028.6	13372.9	18184.6	149727	14393.9	12691.7	13009.8	73556.9	11477.5	9022.54	9642.96	PM - integral
TGME49_291670	149699	93214.7	79770.4	64887.5	207572	127682	100149	196992	157923	116109	132918	147510	apicoplast
TGME49_213900	81643.1	57508.9	43098	58196.2	71718.9	46498.1	61509	69809.5	56160.6	51658.5	35953.3	37619.2	nucleus - chromatin
TGME49_209290	354072	360477	426298	299063	413429	407203	389382	437509	236527	227024	270444	248125	cytosol
TGME49_257990	14202	11251.1	14790.2	14596.1	88985.2	65015.6	83366.6	90612.1	101017	88608.1	97901.2	85196.1	unknown
TGME49_214220	2584.07	2101.83	9045.23	935.044	NA	NA	NA	NA	NA	NA	NA	NA	IMC
TGME49_227620	130918	72497.9	84204.6	66123	336867	259601	168995	224250	135625	123005	72295.8	95404.9	dense granules
TGME49_310118	113484	79868.9	74012.7	74445.3	179939	134764	107822	153965	198165	153837	142183	166413	mitochondrion - soluble
TGME49_269840	41348.6	25542	32165.5	29638.8	109466	98735.4	90506.1	103257	83373.8	76211.3	53817	65071	19S proteasome
TGME49_224530	NA	NA	NA	NA	47657.3	37795.8	30857.6	42323.9	NA	NA	NA	NA	unknown
TGME49_286650	74198.9	50720.1	73133.6	49748.6	NA	NA	NA	NA	NA	NA	NA	NA	mitochondrion - membranes
TGME49_217600	123800	84356.2	87188.2	88135.7	58757.1	28420.6	30624.9	34982.6	34659	32147.9	34765.5	20207.6	unknown
TGME49_285750	173763	104339	74641.6	118873	38457.9	18412.3	8095.48	26676.4	116671	95388.2	68788.8	95442.1	mitochondrion - soluble
TGME49_232540	132875	81442.1	57105.5	72622.9	226707	118369	86715	132486	125352	81734	70530.7	92995.5	mitochondrion - membranes
TGME49_231910	136159	85310	79130.1	89558.2	85847.2	66639.2	51467.5	78280.1	61638	67227.6	47232	77516.8	mitochondrion - membranes
TGME49_209420	185042	24947.4	15297.3	22169.7	223654	16733.3	8723.4	15905.8	45669	5663.23	3579.73	3362.74	unknown
TGME49_208830	29111	14324.4	14919.2	16845.1	48964.6	37083.8	34511.8	36429.9	29062.6	25782.6	21985.9	21578.2	dense granules
TGME49_225550	167942	104756	125023	125593	228358	149770	140267	173932	230987	202829	182403	196693	mitochondrion - membranes
TGME49_264080	446885	378365	290337	306038	539697	480843	381123	499660	562250	523404	570967	554431	apicoplast
TGME49_315610	46715.4	29614	49422.6	30328.2	68911.7	54849.5	43543.8	50637.3	28986.7	19752	16034	23650.6	unknown
TGME49_205700	149240	73169.9	65209.7	69674.9	52363.5	29969.1	39309.4	44722.6	115632	121847	104600	110850	cytosol
TGME49_292035	7182.49	10558	4230.21	3172.44	12597.3	6996.4	7620.08	7059.35	26014.2	19391.8	12055.1	8427.51	NA
TGME49_215775	436668	207108	214025	190629	360355	307598	312121	272944	317979	224725	255111	241282	rhoptries 1
TGME49_205558	2046.11	1419.89	749.762	3310.89	11425.7	6381.03	9038.97	13922.8	13107.4	10332	9405.57	10466.1	cytosol
TGME49_260470	NA	NA	NA	NA	725601	26744.8	47439.6	48661.9	960705	215081	192438	205493	Golgi
TGME49_308940	6578.51	1236.25	2149.66	1270.3	NA	NA	NA	NA	175910	144339	141184	139440	NA
TGME49_234200	127702	101058	84834.3	90390.5	NA	NA	NA	NA	NA	NA	NA	NA	NA
TGME49_239790	159523	117880	145614	145966	30721	26602.2	27997.8	32196.5	118710	124922	105219	104874	nucleus - non-chromatin
TGME49_284040	25935.7	15375.7	14999.1	17035.6	12928.8	6857.75	3302.22	6822.04	51200.3	37737.1	38219.7	38157.6	NA
TGME49_228170	32675.1	39510.2	37089.6	36467	165179	173928	188693	183686	40394.7	72826	50082.2	48276	dense granules
TGME49_271880	85968.8	47621.1	46499.2	61665.9	119931	86453.2	90650.1	70157.7	18038.3	10647.2	9912.47	9370.14	apical 2
TGME49_202350	150840	116318	102728	113734	51875.3	38247.3	29552.3	40736.5	109697	88654.1	64476.4	87336.4	mitochondrion - soluble
TGME49_223140	191883	133356	121275	147048	69884.7	33881.1	68263.9	51406.6	61188.7	63406.2	43315.4	53363.2	unknown
TGME49_216500	75181	52779.5	49461.7	51800.4	7962.54	8195.62	6413.13	8436.04	15960.3	11352	15056.4	15738.1	NA
TGME49_267060	164235	75371.9	97866.4	92262.8	137765	78018.6	90761.8	68509	112733	115877	85572	78298.3	60S ribosome
TGME49_313370	15416.3	6710.54	8175.55	8640.68	13514.6	8994.01	8096.71	11158.3	NA	NA	NA	NA	nucleus - non-chromatin
TGME49_264450	17614.9	8319.78	12318.5	17038	NA	NA	NA	NA	NA	NA	NA	NA	60S ribosome
TGME49_283850	94890	63165.4	65517.4	64464.5	NA	NA	NA	NA	NA	NA	NA	NA	cytosol
TGME49_227860	46319.8	21317	13197	23993.1	41307.6	18652.1	9200.07	23063.2	51315.1	33380.4	31862.5	36889.4	mitochondrion - soluble
TGME49_315220	36457	28031.6	30768.1	31893.5	27028.2	21243.3	21097.2	14065.9	131909	110810	90150.7	90308.6	rhoptries 2
TGME49_288750	514176	274498	183520	198636	467064	203888	185433	278432	474343	259892	256045	235928	mitochondrion - membranes
TGME49_296010	43843.2	30986.8	32158.9	31799.5	25239	19852.8	20532	22750.3	24209.7	20305.3	22059.9	21279.9	nucleus - chromatin
TGME49_298630	24613.7	14466.1	13559.5	17285	22883.4	9574.62	9683.1	15888	14356.7	5260.18	5902.82	6490.99	unknown
TGME49_215785	76551.8	40830.4	56458.3	42380.2	66746.8	45361.6	38004.1	47121.6	NA	NA	NA	NA	rhoptries 1
TGME49_205440	31277.7	27074.7	25821.3	30488.7	18993.8	23372.1	19906.8	17819.2	15603.8	16420.4	14402.6	13977.6	cytosol
TGME49_209950	69612.7	58700.3	45663.8	46253	46874	36877.9	46545.2	34809.7	NA	NA	NA	NA	unknown
TGME49_269180	19561.6	6992.21	11478.1	11156.6	4197.08	NA	647.787	2000.09	5829.94	3972.35	3623.2	3854.52	nucleus - non-chromatin
TGME49_319662	16152.1	8457.26	6953.08	10161.2	61695.9	42320	30128.6	56376.1	55093.8	44122.2	58672.8	56336.3	NA
TGME49_218300	59388	32350.4	38571.7	32539.9	NA	NA	NA	NA	NA	NA	NA	NA	nucleus - non-chromatin
TGME49_313430	1243.73	1104.34	868.599	687.862	NA	1324.28	NA	874.622	1291.27	941.91	977.516	631.266	unknown
TGME49_269290	8600.38	5899.73	6051.93	6043.66	9583.98	6178.59	5214.58	5990.05	15351.2	16016.9	14594.7	12002.6	unknown
TGME49_249270	136828	102397	86030.4	91983.1	170669	229524	235164	147971	135516	146375	127028	112404	unknown
TGME49_248100	NA	NA	NA	NA	41314.8	26487.2	27106.9	29645.4	NA	NA	NA	NA	Golgi
TGME49_235540	2555.77	NA	1621.78	NA	83230.5	105795	77925.3	74466.2	3575.77	4991.95	3483.54	3935.44	cytosol
TGME49_223000	152284	79745.4	82108.8	120233	105044	89007.2	108399	96687.8	133381	77666.9	95014.8	78616.6	unknown
TGME49_230350	51045.9	36348.3	40100.8	43443.4	18074.7	15214.8	13435.7	17069	34131.9	29709	33520.2	36813.5	rhoptries 2
TGME49_289800	532453	406183	405373	445054	625408	481740	543759	614399	575561	528274	418952	474183	Golgi
TGME49_202240	1605.11	1047.16	2657.89	2707.37	31029.9	17754.7	14662.4	25765.3	NA	NA	NA	NA	NA
TGME49_235970	NA	NA	NA	1847.76	37954	29507.2	32315.5	34083.9	52570.2	56826.7	53737.8	44776.5	cytosol
TGME49_297780	2067	1087.64	564.005	1052.3	151522	39601.5	38052.5	53607.6	23423.8	26758.6	22576.4	21140.7	apicoplast
TGME49_211330	120200	96405.9	69617	70279.2	52994.7	25318.6	22493.1	48885.8	69919.2	61242.5	58214.6	46275.7	NA
TGME49_254810	12236.6	9518.07	7551.6	9322.08	18342.6	10820.2	9810.99	9729.3	45291.4	39852.2	33265.2	35237.3	mitochondrion - soluble
TGME49_285970	134824	93765.9	71223.9	76437	29298.8	19454.7	16662.7	25726.1	37976.6	32325.9	33085.8	37035.5	mitochondrion - soluble
TGME49_262040	111345	82946.5	70343.8	83367.6	NA	NA	NA	NA	22355.3	32050.2	26723.9	21938.6	cytosol
TGME49_211300	27703.5	18286.8	16791.2	19049	37982.7	29226	27146.9	32286.8	59407.5	47869.2	41469.1	46279.2	mitochondrion - soluble
TGME49_202500	313008	121031	560235	140294	317486	149724	131639	157242	243011	137066	186076	166594	NA
TGME49_290650	NA	NA	NA	NA	NA	NA	NA	NA	35128.3	34837.6	28765.1	23563.4	mitochondrion - soluble
TGME49_286260	1701.74	NA	797.086	745.404	1386.3	932.058	1531.28	1094.33	46923.8	38824.8	33026.2	25738.2	mitochondrion - soluble
TGME49_218790	NA	NA	NA	NA	110444	80628.1	68255.3	67577.4	171943	127583	100852	121338	mitochondrion - soluble
TGME49_315150	32650.5	24861.4	27602.4	23601.6	163614	121927	125911	124798	50951.6	49082.4	47736.5	40448.1	unknown
TGME49_316730	145151	6108.81	3475.87	3765.12	61713.5	4066.42	4806.8	4821.56	152490	16536.8	17180	22621.6	PM - integral
TGME49_289310	7497.48	5413.72	7430.06	5926.42	14293.6	8725.04	11733	13574.5	NA	NA	NA	NA	unknown
TGME49_214270	64801.1	38861.9	36041.2	40775	26403.4	23738.8	25032.3	27273.9	28322.2	23346.3	22994.8	27959.3	cytosol
TGME49_224350	74084.6	52995.7	82263.1	38119	46426.3	42693.8	32629.2	46680.4	NA	NA	NA	NA	unknown
TGME49_238000	36104.4	23305.3	20962.7	27242.1	NA	NA	NA	NA	235347	154401	156164	176266	unknown
TGME49_314320	33440.3	21408.2	22687.2	21983.2	33702.2	27172.5	21214.1	34387.9	55497.7	50085	59807.9	55946.4	NA
TGME49_292300	NA	NA	NA	NA	21195.1	12473.9	13964.2	16477.3	34619.2	35475.1	29136.7	29805.1	mitochondrion - soluble
TGME49_238180	94580.1	79389.7	72246.9	75744.1	23295.4	21977.6	18730.1	19461	29763.4	26698.5	20829.2	25778.3	19S proteasome
TGME49_311860	9493.12	3305.89	1213.27	6572.07	NA	NA	NA	NA	NA	NA	NA	NA	unknown
TGME49_315950	NA	NA	NA	NA	13882.5	8101.74	9273.88	8433.86	NA	NA	NA	NA	NA
TGME49_292020	34483.2	28630.8	24199.7	30968.9	26768.5	17560.2	19149.5	24693.7	25077.8	18955.7	19100.7	19281.1	unknown
TGME49_249570	33846.4	21495.3	33943.3	19050.1	44661.5	23928	18142.4	19761.7	59706.9	35461.9	33320.2	43017.3	NA
TGME49_249560	9937.89	9586.18	8181.97	10767.9	81691.5	63293.5	53964.4	70912.2	45326.9	41571.4	50496.4	42727.9	unknown
TGME49_321370	10248.2	4366.23	4449.46	6716.53	118918	76324.4	57907.7	81281.7	NA	NA	NA	NA	NA
TGME49_252510	37763.9	32857.5	33919.7	32553.2	73893.5	53707.2	56692.1	68845.7	55360.7	48342.5	50473.8	49286.9	unknown
TGME49_294340	68109	35928.8	49198.2	47692.8	97232.5	64923	49379.6	78722.6	90332.8	76672.5	83655	88630.3	IMC
TGME49_307850	336939	217345	231065	253428	NA	NA	NA	NA	360220	337390	257236	341129	cytosol
TGME49_202080	38633.1	23276.6	23100.2	25646.1	18453.6	11108.5	9933.38	12043.5	60977.6	49233.3	55308.7	51948	NA
TGME49_234380	31504.3	19592.1	21545.3	19896.8	69195.4	49281.9	67537	50789.7	79964	93409.7	82572.9	62187.1	micronemes
TGME49_225800	NA	NA	NA	NA	98866.2	71775.9	65469.4	98968.8	93013.9	85734.9	93718.7	105981	apicoplast
TGME49_250700	6319.48	3988.05	3900.1	2925.27	1434.72	961.94	1453.52	3676.73	NA	NA	NA	NA	unknown
TGME49_214520	2005.74	NA	1489.3	1525.37	NA	NA	NA	NA	2111.36	3900.39	4239.46	2493.17	unknown
TGME49_273870	42665.3	31569.5	32332.4	36264.6	83921.2	66612	104803	55635.3	NA	NA	NA	NA	nucleus - chromatin
TGME49_245620	3.31446e+06	2.44761e+06	2.30486e+06	2.14027e+06	3.92124e+06	2.78183e+06	1.7968e+06	2.20155e+06	3.37685e+06	2.27393e+06	1.39215e+06	2.41331e+06	40S ribosome
TGME49_237100	7312.44	6796.14	5185.88	5877.36	7595.2	5053.17	1136.21	4259.24	NA	NA	NA	NA	NA
TGME49_233110	40631.2	25706.8	26049.9	28924	47371	40243	32379.7	25085.8	14591	22426.7	16289.3	18904.6	cytosol
TGME49_263760	1812.83	1658.46	5308.66	1089.23	16430.1	10263.5	7112.88	13389.6	26855.7	23007.4	17560.6	16185.1	unknown
TGME49_277270	76748.9	59882.9	61617.5	54558.8	24980.3	25409.4	29627.4	20600.6	26901.3	25466.3	20529.1	36181.9	dense granules
TGME49_258540	17049	8607.73	11855.2	11170.1	NA	NA	NA	NA	8395.76	6640.76	4882.5	5156.93	unknown
TGME49_229620	46078.1	32650.1	28095.4	36606	44738.5	30599.4	18996.2	37649.5	52309.3	37910.5	30218.3	35816.9	mitochondrion - soluble
TGME49_258590	30075.4	27736.1	21363.7	22268.8	NA	NA	NA	NA	NA	NA	NA	NA	apicoplast
TGME49_318690	NA	NA	NA	NA	NA	NA	NA	NA	3628.49	1486.53	2562.82	2669.8	nucleus - non-chromatin
TGME49_254580	233266	134781	135814	128339	140319	101245	101878	119271	101075	81446.6	76443.8	78999.1	ER
TGME49_216180	698664	410488	548326	541230	924160	600537	665136	666113	1.33235e+06	1.21765e+06	1.13167e+06	1.07037e+06	ER
TGME49_236820	27225.7	17321.5	14697.7	17771.6	44926.1	26609.1	18463.6	29891.5	45601.3	30089	32123.4	37664.6	mitochondrion - soluble
TGME49_278220	71259.5	38596.6	30872.1	31294.7	86181.9	47020.6	33746.2	59058	105839	74794.8	56670	82114.6	mitochondrion - soluble
TGME49_227600	424700	396491	366933	338959	807280	669003	751392	568170	664007	564773	392005	433507	60S ribosome
TGME49_306660	945791	606852	511162	732501	2169.15	1260.57	NA	3198.05	NA	NA	NA	NA	unknown
TGME49_247520	40270.2	9905.27	12963.6	7482.23	83290.7	97528.5	71616.8	72786.8	9849.52	10024.5	6369.8	8160.33	rhoptries 1
TGME49_224070	NA	NA	NA	NA	5008.87	544.756	NA	990.699	NA	NA	NA	NA	NA
TGME49_233720	182187	115073	139077	139429	116769	85576	105534	103371	135985	135313	115339	108549	unknown
TGME49_259190	NA	NA	656.497	734.563	NA	NA	NA	NA	14712.1	14500.5	12953.6	15658.6	apicoplast
TGME49_221670	NA	NA	NA	NA	21958.1	3868	14355.7	14661.5	44560.6	40542.8	45186.3	45493.1	unknown
TGME49_310710	NA	NA	NA	NA	14965.6	12599.1	9035.31	14509.3	NA	NA	NA	NA	NA
TGME49_207840	88932.9	53731.1	72812.1	69855.2	NA	NA	NA	NA	63456.9	58471.3	68514	60990.8	40S ribosome
TGME49_249530	85437.2	54966.6	78793.7	65725.3	62452.5	58924	57191.2	67354	162907	183025	156241	152772	cytosol
TGME49_300310	63401.6	57000.1	53969.2	61334.3	127005	85226.5	110717	92210.7	115148	101901	99970.2	91518.5	19S proteasome
TGME49_310460	36320	38145.5	25585.9	21566.9	19799.2	18370.1	14331	15596.3	NA	NA	NA	NA	PM - peripheral 2
TGME49_203940	1943.69	3066.37	1545.47	2499.05	235003	133046	90449.2	183819	118195	101662	72342.2	98770.2	mitochondrion - membranes
TGME49_225850	55454.4	32114	24735.6	36856.7	21271	10035.8	16867.3	16406.1	NA	NA	NA	NA	ER
TGME49_201780	53012.2	26441.8	35759.8	35082.9	72954.2	65260.9	72168.5	58805.8	75692.2	75642.8	65258.4	69740.7	micronemes
TGME49_313790	70979.7	55060.6	49345.6	54033.4	NA	NA	NA	NA	7770.44	8596.04	7671.99	8850.01	unknown
TGME49_225130	18708.9	9863.7	8220.52	12154.3	15917.2	12876.6	7989.37	13133.7	25331.3	19876.2	21350	18570.2	NA
TGME49_300641	327507	281776	247912	291599	NA	NA	NA	NA	547025	516756	555645	515769	NA
TGME49_214080	28558.4	7860.93	7618.36	5276.91	30814.4	21586.5	13487.7	23586.6	6529.44	14641.1	9357.86	7560.85	rhoptries 1
TGME49_267500	338843	131766	225512	161908	79190.9	20753.7	8212.18	28003.2	NA	NA	NA	NA	unknown
TGME49_315250	51807	44387.3	37439.5	33286.6	38596.7	32717.3	30504	45833.4	39450.8	32970.7	38137.6	31592.4	cytosol
TGME49_252360	71199.7	43677.9	39980.1	43077.5	78691.7	60024.9	62513.9	73883.2	NA	NA	NA	NA	rhoptries 1
TGME49_256000	148964	98231.8	152578	108240	248959	164136	189467	210032	262521	195869	170218	180889	ER
TGME49_277490	9690.06	7300.43	4496.89	6212.66	4127.29	3596.26	1570.89	1327.46	1120.19	1230.96	991.449	NA	NA
TGME49_241140	50244.2	49295.7	35958.5	40903.3	49418.6	41789.2	32063.4	49334.8	66431.8	54108.3	72761.4	64897.4	NA
TGME49_237840	103459	58970.7	56665.8	68440.1	13384.6	7173.3	7752.24	9205.84	8836.69	6807.86	6762.88	5718.4	NA
TGME49_263480	4082.64	1811.03	950.607	1018.92	41002.4	30151.1	34301.2	38646.6	44999.4	32230	34209.4	38433.7	PM - integral
TGME49_233170	NA	NA	NA	NA	19149.5	6472.19	3626.82	20293.3	69972.8	49713.9	33641	36923.8	NA
TGME49_268770	7810.76	2272.98	1302.81	3748.94	NA	NA	NA	NA	5707.37	2566.08	5731.52	1337.22	unknown
TGME49_235150	4872.69	4573.22	2855.98	4400.98	5629.46	4286.9	5239.57	5019.19	NA	NA	NA	NA	PM - integral
TGME49_205320	1028.33	NA	954.308	NA	NA	NA	NA	NA	NA	NA	NA	NA	cytosol
TGME49_219710	17145.5	8186.42	8439.29	10562.2	9416.81	1624.93	3393.03	3905.7	4929.8	4709.8	4219.06	3863.11	unknown
TGME49_313860	NA	NA	NA	NA	NA	NA	NA	NA	8210.35	7387.09	4775.91	8390.92	cytosol
TGME49_280600	37035.9	13109.1	18794.1	20049.5	42002	15269.2	11223	19682.4	NA	NA	NA	NA	cytosol
TGME49_297430	1842.47	830.623	529.274	NA	NA	NA	NA	NA	1054.68	934.062	506.832	1139.86	nucleus - non-chromatin
TGME49_235490	63495.2	44880.1	56299	45180.7	24878.8	13774.9	18339.7	14821.7	25472.4	25549.2	25997.7	22174.3	cytosol
TGME49_214440	29045.2	21086.6	12553.7	14042.6	60584.1	44629.8	35904.8	44714.3	78200.8	63017.3	76178.7	63066.2	nucleus - chromatin
TGME49_312100	8070.02	5266.87	3698.52	6508.91	NA	NA	NA	NA	NA	NA	971.316	NA	IMC
TGME49_259980	8571.19	3983.75	6913.51	4225.62	29144	23005.7	18904.9	22059.2	21250.5	18022.5	15954.8	15722.7	ER
TGME49_240280	161078	127208	142550	143562	103510	86876.2	98766.2	100478	93476.7	96905.2	90454.2	96331.2	Golgi
TGME49_250890	NA	NA	NA	NA	10510.2	6531.01	5170.72	6298.62	23550	15257.6	11708.9	13805.7	NA
TGME49_242070	36080.5	15960.5	18757.9	16254.8	30565.1	18377.1	11419.5	20234.6	109788	79389.6	71134.1	82170.9	IMC
TGME49_253470	73512.6	48643.6	57705.9	31996.2	56832.6	31683.3	36501.1	32746.4	NA	NA	NA	NA	unknown
TGME49_203840	NA	NA	NA	NA	10630.3	7565.47	6515.79	8142.43	48101.5	43401.7	35300	40202.6	NA
TGME49_249690	247829	178882	129789	149313	239844	137075	88282.6	131528	23155.2	21114.9	17284.8	18574.2	mitochondrion - soluble
TGME49_289000	64014.5	54378.4	43113.4	47280.2	108085	79613.4	55180.5	86275.5	74670.8	54382.5	57387.6	64075.4	apicoplast
TGME49_269800	48175.6	30192.6	20857.3	34468.6	NA	NA	NA	NA	8044.08	6404.16	5163.49	6053.06	cytosol
TGME49_306210	77185.7	57414.1	52995.9	50854.9	133810	85994.5	88179.7	102097	126235	110987	129198	110871	nucleus - non-chromatin
TGME49_293330	NA	NA	NA	NA	NA	NA	NA	NA	12379.2	11003.9	9862.82	10364.2	NA
TGME49_312480	304123	230800	205863	244018	114004	62963.9	61777.7	59541.7	525076	429249	378911	445617	cytosol
TGME49_312520	11942.4	8208.12	9195.6	8174.71	72356.4	55162.2	42780.7	80833.5	79524	71384	92647	72241.8	unknown
TGME49_215710	19195.1	12694.5	8776.74	8454.94	100671	69295.4	61749.4	75517.8	112922	102287	90523.8	82679.8	mitochondrion - membranes
TGME49_224700	20024.8	12175	9662.07	14599.9	45284	24390	27779.8	32090.7	27023.6	19891.8	25813.8	13851.8	unknown
TGME49_224060	NA	NA	NA	NA	93705.2	82101.7	90575.9	94323.9	92441	69066	54875.7	63884.9	unknown
TGME49_313070	NA	NA	NA	NA	68828	48905.4	63592	39916.8	35275.8	27921.2	33574	46931.2	mitochondrion - membranes
TGME49_233490	16552.9	7389.02	7335.73	5782.12	NA	NA	NA	NA	40571.7	35861.9	35223.6	30299.4	NA
TGME49_258850	36321.1	18992.4	15240.4	23004.1	72340.4	49760.7	49150.6	60612	120632	88042.6	91366	88062.4	NA
TGME49_266800	74149.3	44863.1	43032.2	31318.2	33194.9	23993.1	25387.6	28039.3	33008.3	28593.6	26203.9	27802.9	unknown
TGME49_212880	33641.1	22806.8	20929.4	7517.28	NA	NA	NA	NA	NA	NA	NA	NA	unknown
TGME49_293570	42585.6	11180.9	14020.3	9106.22	45664.3	36697.5	50711.3	41982	28933.4	31883	25614.9	24362.4	ER
TGME49_266090	NA	NA	NA	NA	310493	269216	293655	288924	301116	284871	274698	300240	IMC
TGME49_264440	61922.2	44113.6	55113.8	46831.9	11842.6	7775.58	5530.21	7706.75	5100.82	5237.13	4698.27	4930.75	ER
TGME49_273950	15112	12807.6	14050.1	11434.2	12865.4	8212.37	10341.9	12198.1	NA	NA	NA	NA	nucleus - chromatin
TGME49_200460	NA	NA	NA	NA	71871.2	18090.4	36222.8	18690.4	NA	NA	NA	NA	PM - peripheral 2
TGME49_223910	337001	211455	227575	221756	73525.1	61422.7	50007.2	66758.2	81665.2	74333.5	77866	70398.3	ER
TGME49_293690	28703.5	3825.94	14806.2	6300.35	119546	124631	79574.3	93850.9	28236.1	22264.3	18702.4	15933.9	cytosol
TGME49_300200	118470	33325.4	66888.2	22951	43641.4	53661.5	44438	30410.6	NA	NA	NA	NA	nucleus - chromatin
TGME49_216620	107076	73915.2	79750.7	59851.2	117819	64572	82517.2	73185.8	19803.6	16083.1	18568.3	16094.3	PM - integral
TGME49_211480	18880	12662.2	9914.65	11462.4	34697.9	22838.4	16332	25475.6	26788.9	19138.4	18974.3	18348.3	NA
TGME49_311290	380464	258571	344083	250915	961633	818936	659035	826522	NA	NA	NA	NA	ER
TGME49_218610	84091	56289.5	55692.7	59963.8	53758.3	15444.8	20174.3	20018.9	51809.3	23275.8	28172.2	28260.1	nucleolus
TGME49_316120	NA	NA	NA	NA	3767.92	1476.93	1141.68	1475.31	8139.16	8868.47	5988.7	7431.93	NA
TGME49_237820	9149.25	2605.41	2942	3209.55	53744.9	36810.8	36823.3	48880.3	1969.03	2460.42	4957.99	4607.89	IMC
TGME49_224890	NA	NA	NA	NA	20149.9	14374	12824.4	14827.3	NA	NA	NA	NA	unknown
TGME49_297500	3509.82	NA	2502.63	1327	NA	NA	NA	NA	NA	NA	NA	NA	cytosol
TGME49_299070	NA	NA	NA	NA	NA	NA	NA	NA	10064	17906.6	5891.45	6764.56	mitochondrion - soluble
TGME49_263060	NA	NA	NA	NA	1561.24	1600.54	4178.27	4980.01	1931.1	1515.19	2615.55	1555.04	19S proteasome
TGME49_270320	81677.7	50257.7	35735.3	62569	24539.1	25368.9	18340.9	27137	37859.5	37971.6	41985.4	45778.5	unknown
TGME49_306950	NA	NA	NA	NA	NA	NA	NA	NA	797.768	NA	585.936	971.706	NA
TGME49_265470	40999.6	23338.8	17525.5	23934.2	7726.23	4891.74	2029.94	4779.28	NA	NA	NA	NA	mitochondrion - soluble
TGME49_311240	NA	NA	NA	NA	5650.48	3806.4	5444.54	3715.45	NA	NA	NA	NA	unknown
TGME49_229640	1756.69	NA	NA	NA	NA	NA	NA	NA	NA	NA	NA	NA	apical 1
TGME49_314780	21813.6	12094.3	9131.12	11725.6	34985.4	10938.7	16560	12760	NA	NA	NA	NA	PM - peripheral 2
TGME49_249850	322395	207129	152379	208959	364156	240621	289047	282977	187534	191836	89536.2	114115	IMC
TGME49_241870	NA	NA	NA	NA	NA	NA	NA	NA	22954.5	16701.2	17193.2	17360.4	NA
TGME49_208590	69127.7	39894.2	44893.7	44367.8	21431.2	13618.2	17763.8	14985.2	175193	156085	154389	131963	unknown
TGME49_255410	NA	NA	NA	NA	NA	NA	NA	NA	13913.5	10499	12358.3	13280.2	PM - integral
TGME49_248120	21637.5	13456	15608.6	12586	18510.4	10814.6	10901.5	11226.8	14928.3	13505	15402.9	12124.2	nucleus - chromatin
TGME49_203990	1670.92	918.655	NA	1426.08	1727.94	3368.39	1482.84	3289.06	1513	608.892	1222.39	1623.08	rhoptries 1
TGME49_222660	28236.7	5206.57	5595.18	4102.23	222552	40101.9	47500.8	43063.4	508215	201164	197621	174161	unknown
TGME49_214840	26392.5	10767.2	14954.6	15318	42871.7	30428.6	30080.9	36199.5	35221	33320.2	29230.1	30209.8	nucleus - chromatin
TGME49_206500	NA	NA	NA	NA	13932	8100.61	5683.57	8690.33	NA	NA	NA	NA	unknown
TGME49_300700	278178	238996	163825	204003	233607	207132	199899	250737	NA	NA	NA	NA	NA
TGME49_203620	13911.3	13399.4	8969.99	8709.91	NA	NA	NA	NA	65992.4	12101.1	11504.1	14226	mitochondrion - soluble
TGME49_216170	37524.6	33381.2	22200	27641	24419.2	15681.1	16595	16792.6	67512.9	42133.6	46202.9	45544.2	unknown
TGME49_215370	12519.4	7620.67	7857.42	7138.33	23277	12170.3	11651	14600.7	45441.9	31953.2	26785.2	29967.3	NA
TGME49_293060	NA	NA	NA	NA	11423.4	9671.57	7314.21	10489	16917.7	18895	18537.4	21794.3	nucleus - non-chromatin
TGME49_202720	9553.63	6314.92	5765.43	7726.87	14108.1	7717.81	6265.05	10431.4	5516.9	5040.39	2480.65	4164.01	unknown
TGME49_226410	NA	NA	NA	NA	50139.7	39541.9	30367.3	35839.2	NA	NA	NA	NA	cytosol
TGME49_213770	66493.6	44177.5	41432.2	43828.2	NA	NA	NA	NA	NA	NA	NA	NA	unknown
TGME49_272570	9591.77	5934.48	4239.43	4980.13	19708.5	16874.1	14571.9	21470.1	22248.3	22558.9	26322.2	20567.6	NA
TGME49_255370	13269.9	13637.2	10581.4	11802.6	10894.6	9872.65	8248.03	13499.1	16149	12998.9	16525.1	12718.2	NA
TGME49_203240	80175.2	55575.9	43408.5	56745.7	48144.2	44304	30274.7	35626.9	75643.8	75186.5	60370.7	72688.1	ER
TGME49_238050	68978.1	44065.9	42481.4	46314	66723	61947.1	65148	63467	29159.2	28560.4	24908.9	22251.1	nucleus - non-chromatin
TGME49_219790	NA	NA	NA	NA	NA	NA	NA	NA	35246	34870.1	32495.5	33572.6	nucleus - non-chromatin
TGME49_226330	8956.72	9886.35	4358.87	8033.42	NA	NA	NA	NA	37493.8	36858.8	43905.3	38938.6	NA
TGME49_316540	30915.6	17490.2	25113.8	21514.6	23142.4	19113.4	16657	20116	NA	NA	NA	NA	IMC
TGME49_209190	3227.86	3131.22	2321.07	7609.22	11431.9	11105.3	9273.43	9781.11	8037.88	9054.24	10428.2	10229	mitochondrion - soluble
TGME49_285780	24934.5	16029	12554.4	15152.1	NA	NA	NA	NA	NA	NA	NA	NA	NA
TGME49_205350	258242	192895	232761	229152	60658	47127.1	53776.1	46190.7	34060.2	34813	40354.5	37079	ER
TGME49_275802	72827.2	39154.1	45323.8	50506.9	44669.6	19604.2	35539	37026.5	NA	NA	NA	NA	unknown
TGME49_210700	NA	NA	NA	NA	6343.79	3265.27	4502.83	5424.75	4051.12	1254.64	1324.6	1310.55	unknown
TGME49_250810	87687.9	65935.3	77870.2	65891.4	302805	235057	224058	248447	382489	335250	304136	313473	unknown
TGME49_236540	76809.8	42628.8	39737.7	49882.5	13511.7	8986.71	8419.9	6713.67	20373.8	11171.1	12636.9	14116.5	nucleus - non-chromatin
TGME49_315810	24578.8	16801	17446.6	17374.2	52843.6	42152.1	42313.3	45830.7	47819.5	43430	51390.2	40379.7	unknown
TGME49_207200	NA	NA	NA	NA	NA	NA	NA	NA	2823.89	3359.98	4032.87	2099.47	NA
TGME49_251570	3253.62	3087.08	1354.49	2702.21	6981.64	4429.44	1513.35	4088.47	13022.3	10575.1	10415.4	10470.2	NA
TGME49_272670	NA	NA	NA	NA	44979.4	24126.2	24294.4	25448.8	176149	144875	109454	164165	mitochondrion - soluble
TGME49_263180	NA	NA	NA	NA	60969.1	34478	33266.6	28461	NA	NA	NA	NA	PM - peripheral 1
TGME49_205580	85363.6	63546	36699.9	66266.9	8673.23	5378.72	6909.92	7284.31	11537	19541.7	16335.3	15168.4	nucleus - chromatin
TGME49_257070	NA	NA	NA	NA	16621.9	11482.1	3633.2	26416.8	NA	NA	NA	NA	unknown
TGME49_276170	16988	8083.49	11788	9319.29	NA	NA	NA	NA	47974.1	40068.9	32249.1	38627.8	cytosol
TGME49_216730	79686.9	43574.2	55074.4	51551.3	NA	NA	NA	NA	NA	NA	NA	NA	unknown
TGME49_270270	2187.72	3303.14	802.115	2717.47	1994.36	2051.78	2227.37	2441.57	NA	NA	NA	NA	ER
TGME49_213670	7248.12	4321.2	5497.77	4557.87	15142.7	11025.8	10435.5	10942.9	12474.2	9475.6	10311.6	10327.3	mitochondrion - membranes
TGME49_233220	10697.3	9047.21	11416.7	11778.3	6731.78	7096.36	5263.53	6591.79	10117.5	13142.2	12246.4	11016.1	PM - integral
TGME49_273370	15189.7	8433.64	9284.22	11484.9	NA	NA	NA	NA	NA	NA	NA	NA	cytosol
TGME49_311090	13250.4	9538.69	9085.15	10770.5	9974.57	9560.84	11019.5	10152.7	858.436	NA	NA	NA	cytosol
TGME49_315700	9256.18	5524.42	3255.61	6460.37	NA	NA	NA	NA	NA	NA	NA	NA	unknown
TGME49_215690	16431.7	12209.3	11318.6	11701.2	NA	NA	NA	NA	11853.8	9832.62	9722.86	7908.99	apicoplast
TGME49_321400	23765.5	9278.66	15157.5	13283.8	NA	NA	NA	NA	80313.3	72916.7	76193.8	77426.8	ER
TGME49_311030	NA	589.811	NA	NA	NA	NA	NA	NA	NA	NA	NA	NA	nucleus - non-chromatin
TGME49_311680	10250.5	8181.45	4681.35	3477.72	3288.14	NA	2131.41	2311.58	2453.41	2767.32	4692.78	5533.39	mitochondrion - membranes
TGME49_252500	18945.9	14114.7	12831.7	11533.9	8012.47	5783.28	5937.99	4310.64	19350.4	17296.2	17588.8	14898.7	rhoptries 1
TGME49_247450	NA	NA	NA	NA	12493.6	8583.29	6240.78	8691.57	8053.6	8686.5	7441.39	6710.84	nucleus - non-chromatin
TGME49_297745	2229.13	986.308	935.186	712.706	19984.2	17475.2	17625.2	25388.2	NA	NA	NA	NA	unknown
TGME49_288530	32488.3	20076.6	22413.6	18733.2	10499.1	5772.16	6197.96	7856.88	9767.85	8663.29	8306.66	10175.8	nucleus - non-chromatin
TGME49_217590	18356.5	13728.7	9063.91	9822.31	18530	12592.5	12141.2	15390.7	43438.3	39641.3	45060.8	42982.7	NA
TGME49_207370	NA	NA	542.676	534.025	NA	NA	NA	NA	NA	NA	NA	NA	nucleus - chromatin
TGME49_216080	291931	158421	154994	156910	22721.3	10543.4	11811.2	12284.5	NA	NA	NA	NA	unknown
TGME49_238040	NA	NA	NA	NA	NA	NA	NA	NA	18737.8	19273.6	14247.8	16804	ER
TGME49_297170	37513.4	25775.2	21437.5	23975.7	NA	NA	NA	NA	73357	50704.5	52193.1	48020	mitochondrion - soluble
TGME49_289300	49781.5	34072.1	17883	46763.8	NA	NA	NA	NA	4947.64	6471.61	5023.59	5444.45	cytosol
TGME49_231600	35058.6	30702.4	34190.4	30479.8	16988.8	11252.7	6311.3	13095.4	133764	147717	137782	136767	cytosol
TGME49_203630	NA	NA	NA	NA	NA	NA	NA	NA	784660	671924	431629	570039	60S ribosome
TGME49_310050	9169.44	5700.4	6497.67	8480.94	41627.2	32693.1	35144.8	40869.3	7674.5	7984.05	6429.88	4338.51	nucleus - non-chromatin
TGME49_261760	46692.9	30850.1	33536	31158.9	53110.7	38276	42091.6	40912.2	43337.7	41054.9	38969	33174.8	ER
TGME49_226590	NA	NA	NA	NA	NA	NA	NA	NA	141662	112953	100609	114683	mitochondrion - membranes
TGME49_315570	164056	133427	164944	104774	221072	149239	127681	138614	NA	NA	NA	NA	NA
TGME49_218590	118790	101414	76439.4	97652.5	NA	NA	NA	NA	11711.5	10708.4	9958.07	9295.47	mitochondrion - soluble
TGME49_222140	5983.49	3347.18	1602.83	2630.36	1984.12	1309.68	1711.53	1527.9	2077.98	3077.72	3292.77	4408.37	apicoplast
TGME49_316610	54327.9	29260	17652.4	48585.9	21822.2	18682.7	11257.9	16502.6	15576.7	15031.2	11235.6	14406.8	NA
TGME49_232080	27755.4	7979.41	11380.2	8803.71	2012.2	NA	NA	NA	9864.4	1308.18	517.105	550.519	unknown
TGME49_252465	NA	NA	NA	NA	143264	98291.4	77057.3	83802.7	NA	NA	NA	NA	NA
TGME49_309110	33719.8	40213.7	21383.8	34946.2	NA	NA	NA	NA	49269	61844.1	55884.8	61105.5	NA
TGME49_237015	11115.8	5622.15	6733.84	6956.58	123346	97585	93438.5	128876	NA	NA	NA	NA	dense granules
TGME49_247350	NA	NA	NA	NA	4508.88	3993.9	22808.9	7322.57	NA	NA	NA	NA	ER
TGME49_257530	NA	NA	NA	NA	334855	219871	213172	241957	270317	180507	160924	158193	PM - integral
TGME49_310130	9780.59	3066.3	5662.53	4920.94	NA	NA	NA	NA	NA	NA	NA	NA	nucleus - chromatin
TGME49_264600	10632.6	5843.04	4231.83	7516.04	9772.57	5002.06	7204.64	6305.75	4820.55	3332.72	3018.61	1391.49	rhoptries 2
TGME49_232590	1192.94	NA	543.513	857.884	NA	NA	NA	682.194	NA	NA	481.654	737.964	NA
TGME49_280480	152498	108288	127980	113532	168284	146486	136791	134381	127000	123736	113237	120592	rhoptries 2
TGME49_200290	NA	NA	NA	NA	NA	NA	NA	NA	13464	10810.7	8210.15	9891.55	NA
TGME49_305250	4098.21	1414.51	2437.06	948.768	4514.91	1754.26	2063.55	4207.58	NA	NA	NA	NA	rhoptries 2
TGME49_259550	104682	83945.1	83069.6	77789.3	79456.9	70321.4	61677	80095.1	NA	NA	NA	NA	cytosol
TGME49_270100	7154.18	6483.16	4578.04	4736.74	6381.24	5234.58	6615.05	5172.67	9901.93	5808.73	8441.74	6901.83	NA
TGME49_211710	75468.9	41788.4	53648.6	51339.5	55445.4	43299.6	33425	38815.8	NA	NA	NA	NA	ER
TGME49_286440	NA	NA	NA	NA	5546	NA	522.898	5367.38	9286.49	7958.28	7600.54	7700.15	nucleus - non-chromatin
TGME49_319710	1308.86	NA	2637.42	659.586	NA	NA	NA	NA	NA	NA	NA	NA	NA
TGME49_255260	92852.5	77717.1	63398.9	63535.8	5092.13	4451.52	6156.02	5530.99	143853	9121.13	17583.2	6981.07	micronemes
TGME49_209108	60242.6	30867.1	38848.2	34786.9	55482.6	38890.8	43171.7	50385.7	16812.4	13116.3	13697.2	10783	unknown
TGME49_237530	38945.3	22815.4	21633.7	24339.8	NA	NA	NA	NA	37808	34534.8	30454.6	29118.2	NA
TGME49_262000	NA	NA	NA	NA	35769.2	23690.9	20505.1	26216.2	NA	NA	NA	NA	mitochondrion - soluble
TGME49_277710	46392.1	14881.2	32672.5	19146	30479.5	19650.7	37658.3	39037.7	NA	NA	NA	NA	nucleus - chromatin
TGME49_249490	NA	NA	NA	NA	5816.11	4056.69	3861.87	6104.67	11971.4	11077.5	10596.5	9050.52	NA
TGME49_266260	NA	NA	NA	NA	14676.4	7999.72	6324.98	8646.86	24876.1	17071.7	14752.2	23906.9	mitochondrion - soluble
TGME49_214210	28193.5	22312.4	15026.1	17225.7	81252.1	58794	54521.5	53526.4	67053.3	57224	41736.4	46712.4	cytosol
TGME49_260630	79636.4	58546.5	57616.2	55749.4	30202.2	14043.9	19085.6	12740.2	NA	NA	NA	NA	ER
TGME49_286530	9725.64	4907.85	3990.65	9109.73	NA	NA	NA	NA	NA	NA	NA	NA	mitochondrion - membranes
TGME49_214370	NA	NA	NA	NA	NA	NA	NA	NA	6078.6	3095.54	2889.47	3634.83	unknown
TGME49_227140	83558.9	55615.7	46876.8	55049.4	66315.6	45459.3	37918.1	45581.8	32803.6	29860.7	29839.7	30024.7	unknown
TGME49_291960	185070	79521.3	93878.8	85713.2	130179	148537	110288	77873.7	102667	83035.8	87384.1	71010.2	rhoptries 1
TGME49_251950	54154.9	37322.8	33105.2	24313.5	255926	142679	112290	186436	233547	195386	150578	205939	mitochondrion - soluble
TGME49_273050	1515.5	NA	919.715	1090.59	NA	324.138	NA	1284.63	NA	NA	NA	NA	unknown
TGME49_253440	NA	NA	NA	NA	NA	NA	NA	NA	18130.1	12416.8	9741.28	8179.11	unknown
TGME49_221590	79692.6	56511.9	57625.9	72991.1	29249.3	30018	26689.1	20953.2	NA	NA	NA	NA	unknown
TGME49_284645	15800.5	16414.6	8353.35	16830.3	NA	NA	NA	NA	NA	NA	NA	NA	NA
TGME49_233010	28775.8	16448.8	17047.7	23328.4	NA	NA	NA	NA	NA	NA	NA	NA	unknown
TGME49_233500	NA	NA	NA	NA	NA	NA	NA	NA	87035.8	61159.8	91491.1	76869.8	apicoplast
TGME49_289650	87307.3	42995.6	75690.9	63102	46016.2	27629	29762	33500.2	NA	NA	NA	NA	cytosol
TGME49_207940	NA	NA	NA	NA	9693.59	4957.21	1611.05	6392.5	13147.7	7749.65	6537.43	8534.72	NA
TGME49_202180	3775.12	3143.22	2678.6	1024.41	NA	NA	NA	NA	980.742	612.368	848.592	848.447	NA
TGME49_271860	77566.5	63327.1	47380.5	53343.6	68055.1	65149.1	50719.4	73595.6	24809.3	23611.8	27612.8	24619.2	NA
TGME49_278250	NA	NA	NA	NA	117822	80618.5	68846.6	93605.8	14090.9	10634.3	9360.98	9449.73	mitochondrion - soluble
TGME49_220300	NA	NA	NA	NA	NA	NA	NA	NA	11098	6279.74	8891.07	7785.38	apicoplast
TGME49_220200	17071.9	9848.39	6735.75	7994.19	28877.6	14265.5	8818.46	16983	93719.6	63123.6	58572.6	73758.3	mitochondrion - soluble
TGME49_207800	NA	NA	NA	NA	NA	NA	NA	NA	31111.3	25342.2	24364.5	23990.4	mitochondrion - soluble
TGME49_291930	2440.51	1619.74	NA	1232.14	6180.94	4781.36	5107.85	3145.11	NA	NA	NA	NA	cytosol
TGME49_221360	5462.45	3720.6	3126.64	3612.26	NA	NA	NA	NA	NA	NA	NA	NA	NA
TGME49_313450	4742.47	NA	4157.92	2921.73	10013.1	2758.95	3948.64	10072.5	NA	NA	NA	NA	unknown
TGME49_211040	NA	NA	NA	NA	12191.2	9206.23	7579.32	9149.26	NA	NA	NA	NA	ER
TGME49_213910	135268	78125.2	106996	82793.2	101719	77344.7	57023.9	66501.1	53205.8	59372.7	53619.9	49631.6	ER
TGME49_213420	30957.9	19423.7	15529.9	16867.4	26487	19014.7	12592.7	17823.2	28598.8	22650.6	20539.4	21004	mitochondrion - soluble
TGME49_215070	NA	NA	NA	NA	NA	NA	NA	NA	42847.7	36915.3	40218.5	37227.7	apicoplast
TGME49_222210	38306.9	42202.2	34992.5	34018	43945.5	40946.9	37227.8	48108.3	87062.3	142928	101887	109039	mitochondrion - membranes
TGME49_268370	967.035	1160.77	2794.21	892.825	1813.76	738.532	1505.91	986.434	NA	NA	NA	NA	nucleus - chromatin
TGME49_227900	150533	60532.6	93600.8	61828.1	NA	NA	NA	NA	NA	NA	NA	NA	nucleus - chromatin
TGME49_252210	1006.46	1004.92	1277.45	884.702	1142.24	575.47	1062.09	873.499	NA	NA	NA	NA	nucleus - chromatin
TGME49_267790	NA	NA	NA	NA	2411.65	4692.52	1749.86	1263.65	10720.7	7823.93	9654.8	9099.55	NA
TGME49_255420	294597	175918	208422	186376	288242	215548	210760	226676	NA	NA	NA	NA	IMC
TGME49_261080	1198.56	1168.22	1715.73	2584.63	NA	NA	NA	NA	2282.86	6000.19	3764.96	4446.46	unknown
TGME49_281490	38367.9	20964.8	25912.8	20699	NA	NA	NA	NA	34258	29839.4	35576.3	24115.1	cytosol
TGME49_306650	17903.5	13508.6	12621.8	11543.8	NA	NA	NA	NA	11181.5	11322.4	14890.7	11788.9	mitochondrion - membranes
TGME49_225470	NA	NA	NA	NA	30312.3	21492.9	26330	25063.9	24438.3	19347.1	19519.3	17022.3	unknown
TGME49_231410	36082.9	17671.7	15950.1	25733.5	56327.7	48730.5	39476.4	41078.7	29544.6	23515	18866	19998.4	mitochondrion - membranes
TGME49_216700	112722	83650.2	62352.7	83158.1	NA	NA	NA	NA	111976	87719.6	112491	90340.3	NA
TGME49_290920	50829.1	15139.6	31637.9	21542	NA	NA	NA	NA	NA	NA	NA	NA	unknown
TGME49_219860	NA	NA	NA	NA	NA	NA	NA	NA	2438.17	3968.93	3475.29	2719.55	unknown
TGME49_257790	NA	NA	NA	NA	259210	45587.8	41974	51340.3	52740	20390.1	21042	20626.3	NA
TGME49_258240	1119.91	857.569	526.356	549.65	840.207	NA	1091.96	NA	NA	NA	NA	NA	nucleus - chromatin
TGME49_220450	NA	NA	NA	NA	NA	NA	NA	NA	9623.41	12217.4	12861.6	9712.8	nucleus - chromatin
TGME49_275980	NA	NA	NA	NA	NA	NA	NA	NA	63144	44897.4	40546.3	41749.2	mitochondrion - membranes
TGME49_201150	2230.14	1523.11	2826.86	1504.97	NA	NA	NA	NA	NA	NA	NA	NA	endomembrane vesicles
TGME49_222050	22164	14231.2	11186.1	16923.9	NA	NA	NA	NA	NA	NA	NA	NA	nucleus - non-chromatin
TGME49_265450	191270	142577	163141	128284	NA	NA	NA	NA	NA	NA	NA	NA	cytosol
TGME49_309730	NA	NA	NA	NA	18925.7	15419.9	12532.8	12113.8	9345.29	5569.02	6328.13	5813.54	cytosol
TGME49_251810	35468	14681.6	16405.9	15430	89574.8	62496.5	27444.6	76468.2	17253.1	13201.9	12263.3	9959.16	cytosol
TGME49_217570	357132	285519	347692	324631	484590	310239	420530	446898	209597	162817	133086	150341	unknown
TGME49_209800	45819.2	10403.2	8200.27	14361.4	37188.9	10413.8	12570.1	11339.3	41437.9	17310.6	10429.9	10766.9	PM - integral
TGME49_252270	185348	120893	114961	107700	158166	80714.9	58466.1	108408	191608	144669	127523	152927	unknown
TGME49_203280	11373	5661.25	5654.7	7679.66	8022.1	5696.09	5618.27	4907.64	5040.68	3916.23	4321.3	3615.82	NA
TGME49_226270	NA	NA	NA	NA	NA	NA	NA	NA	6544.1	5489.66	5688.73	5869.55	ER
TGME49_233120	26761.3	16511.5	17682.4	18314.3	39569.7	22097.1	20236.7	27859.9	57229.5	49512.5	43855	42660.8	unknown
TGME49_239350	1302.69	921.226	1090.09	602.382	NA	NA	NA	NA	6986.6	6617.83	6034.43	4875.12	NA
TGME49_297640	NA	NA	NA	NA	NA	NA	NA	NA	13637.5	10728.2	11636.9	15018.7	NA
TGME49_225960	1093.35	768.254	482.352	NA	NA	NA	NA	NA	NA	NA	NA	NA	NA
TGME49_203730	NA	NA	NA	NA	7858.34	6452.83	5920.78	10423.3	NA	NA	NA	NA	mitochondrion - soluble
TGME49_300608	249308	282128	221074	290855	321019	257376	227727	321940	250605	309647	319467	279970	NA
TGME49_221470	18413.5	13644.7	7858.77	12518.8	32717.7	25778.1	36020.6	30623.2	28052.7	24107.5	15429.4	18379.9	unknown
TGME49_306400	4166.9	3505.88	2916.6	1233.71	NA	NA	NA	NA	NA	NA	NA	NA	nucleus - chromatin
TGME49_271050	NA	NA	NA	NA	9760.29	14638.7	13252.3	15707.5	NA	NA	NA	NA	PM - peripheral 1
TGME49_216670	10823.7	6271.04	2519.29	2048.26	18740.8	14028.9	10360	11754.1	NA	NA	NA	NA	nucleus - non-chromatin
TGME49_267020	94913.4	107454	74944.7	90776.5	NA	NA	NA	NA	50989.4	35321.9	31439.1	35668.3	NA
TGME49_309010	NA	NA	NA	NA	44620.2	23848.6	14596.7	24349.8	33178.2	19826.9	19074.8	19408.5	mitochondrion - soluble
TGME49_206430	4571.28	1839.72	3225.08	1101.85	NA	NA	NA	NA	NA	NA	NA	NA	NA
TGME49_300690	NA	NA	NA	NA	144489	134274	148617	156140	80707.3	81564.7	105305	91640.6	NA
TGME49_258380	17288.1	15238.6	14984	16105.5	36050.4	28068.1	29513.1	35656.9	17857.8	15395.2	21534	17576.8	apicoplast
TGME49_260825	38962.9	28393.1	11253.6	21855.1	63300.4	61166.8	30724.4	62370.8	8189.05	3972.42	3431.86	5074.1	apical 1
TGME49_313820	8125.02	5259.84	4543.62	6725	12289.3	12845.9	14598.3	16566.9	26369.6	27277.8	25785.9	21293.1	unknown
TGME49_253730	40880.2	23063.5	36937.8	33094.5	196272	128618	179269	159397	NA	NA	NA	NA	cytosol
TGME49_305510	NA	NA	NA	NA	34966.4	30497.8	32152.1	34844	125390	115393	114413	128122	unknown
TGME49_265330	45864.2	28752.7	26667	39584.6	NA	NA	NA	NA	NA	NA	NA	NA	nucleus - chromatin
TGME49_320300	9024.06	5805.25	6885.48	7970.4	NA	NA	NA	NA	NA	NA	NA	NA	nucleus - chromatin
TGME49_266110	NA	NA	NA	NA	26307.3	17628.3	14553.1	17553.9	28128.7	26932.9	24156.4	28298	NA
TGME49_214870	3783.2	824.669	3549.69	1530.69	NA	NA	NA	NA	75893.1	52820.9	41937.4	51920	mitochondrion - soluble
TGME49_321300	1014.15	NA	NA	NA	NA	NA	NA	NA	NA	NA	NA	NA	unknown
TGME49_204490	19849.7	18588.1	18730.2	23472	18961.7	11921.4	17176.4	15705.4	26895.8	23089.2	20419.1	21224.4	unknown
TGME49_310780	77598.1	48556.6	46933.7	54448	59482.8	42540.6	38362.4	42035.7	50641.4	50008.4	26691.9	48385.8	dense granules
TGME49_313910	29550.7	15101.9	16446.2	15811.9	NA	NA	NA	NA	NA	NA	NA	NA	unknown
TGME49_267730	NA	NA	NA	NA	18454.6	10650.8	13495.2	12594.5	NA	NA	NA	NA	ER
TGME49_224235	NA	NA	NA	NA	NA	NA	NA	NA	32678.8	30462.2	30386.8	27194.6	NA
TGME49_252480	52518.3	33598.9	24923.3	31476.3	62410.7	28005.7	25256.2	42923.6	62424.7	44106.2	39307.4	48900.7	mitochondrion - soluble
TGME49_310190	968.482	1722.35	1421.06	2799.64	NA	NA	NA	NA	NA	NA	NA	NA	unknown
TGME49_226090	13731.1	8167.07	7176.71	9045.65	1357.2	1521.12	1655.34	1669.58	NA	NA	NA	NA	NA
TGME49_243530	18626.1	10036	7434.36	12279.5	13986	9998.33	8054.89	12491.7	4815.47	6437.4	7175.29	8860.51	NA
TGME49_257340	NA	NA	NA	NA	18936.6	17584.6	7249.86	13717.4	18330.6	14113.4	16983.8	16825.5	Golgi
TGME49_249610	1736.36	1193.8	1039.45	1303	NA	NA	NA	NA	NA	NA	NA	NA	nucleus - non-chromatin
TGME49_265250	5991.72	3551.52	2719	3648.85	8431.13	6869.61	4255.47	6373.79	2335.38	4132.01	3189.4	3548.16	nucleus - chromatin
TGME49_221690	NA	NA	NA	NA	1225.09	871.389	NA	1339.06	1056.59	1205.33	1334.57	730.71	cytosol
TGME49_253700	5518.06	2786.45	4396.24	923.288	8980.36	7888.98	9033.17	8786.17	7179.71	8347.27	4992.34	6974.44	PM - integral
TGME49_254030	149738	97399.5	88033.6	119485	199611	153983	113283	153082	235603	177014	138691	164391	mitochondrion - membranes
TGME49_224320	8976.11	7778.34	6289.03	8078.9	10364	6751.29	3036.76	6888.67	NA	NA	NA	NA	NA
TGME49_228190	95158.7	68059.3	88513.5	75515.6	NA	NA	NA	NA	NA	NA	NA	NA	nucleus - non-chromatin
TGME49_294010	11042.4	5953.07	8351.54	7701.95	8918.49	6635.02	5258.7	6713.2	NA	NA	NA	NA	unknown
TGME49_229000	83823.1	55572.2	35324.1	67381	139995	111380	141005	152936	64610.6	75259.6	61319.7	49948.2	cytosol
TGME49_260240	NA	NA	NA	NA	109269	88417	100935	91185	238201	212820	205344	183232	unknown
TGME49_313080	13339.6	5383.54	5091.65	5381.29	9275.83	6533.27	5655.17	5703.36	NA	NA	NA	NA	ER
TGME49_252440	78673.2	53021.4	73793.9	67345.7	197066	165198	166285	166520	155914	151552	147111	144536	ER
TGME49_201760	23501.2	17351.9	12942.1	15338.5	48670.9	32373.9	28043.1	34790.4	30757.3	26199.3	25668.4	28575.8	apical 1
TGME49_320010	1792.55	1000.68	958.072	864.399	NA	NA	NA	NA	NA	NA	NA	NA	nucleus - non-chromatin
TGME49_254410	57208	46874.9	34867.7	39743.3	NA	NA	NA	NA	61754.3	55524.4	45151.4	50695.2	mitochondrion - soluble
TGME49_306350	NA	NA	NA	NA	27625	13770.5	8585.73	9485.54	17639.5	8465.51	9969.95	12819.6	apical 1
TGME49_299900	NA	NA	NA	NA	17199.1	14436.1	12169	18082.8	13017.5	14002.7	13075.3	9492.54	unknown
TGME49_231160	83146.8	33240.9	272859	29741.6	NA	NA	NA	NA	NA	NA	NA	NA	unknown
TGME49_209820	NA	NA	NA	NA	NA	NA	NA	NA	30049	NA	NA	NA	PM - integral
TGME49_278890	4039.43	1720.02	2622.4	3008.12	NA	NA	NA	NA	NA	NA	NA	NA	Golgi
TGME49_316480	54338	51032.9	38760.2	43361.2	NA	NA	NA	NA	4000.69	4070.5	5447.21	4369.56	NA
TGME49_257480	12451.5	9893.81	7542.5	9408.86	8932.73	1014.74	1361.78	4988.3	4017.32	3415.01	4035.71	2605.51	mitochondrion - soluble
TGME49_231460	77258.3	44642.7	33760	46491.8	101988	51640	32897.5	46977.9	NA	NA	NA	NA	mitochondrion - soluble
TGME49_259710	109674	66702.4	54289.9	59718.6	160503	99918.9	81821.7	119869	141226	105918	83292.9	119409	mitochondrion - soluble
TGME49_318460	NA	NA	NA	NA	NA	NA	NA	NA	2265.83	2502.71	3685.59	2810.28	ER
TGME49_314790	9327.53	4468.79	3398.27	7293.47	NA	NA	NA	NA	10817.3	10132.3	10629.4	9397.74	nucleus - non-chromatin
TGME49_275440	NA	NA	NA	NA	28368.2	18863.2	16287.9	23839.1	13453.8	4474.9	5620.09	5345.31	dense granules
TGME49_285240	123404	83565.9	92248.4	86690.6	NA	NA	NA	NA	NA	NA	NA	NA	ER
TGME49_276970	14661.5	11331.7	9738.74	8450.17	58158.3	52947.1	45881.3	61610.3	18323.8	17982.4	15352.6	15210.7	apicoplast
TGME49_260790	10339.6	7217.44	6295.18	6977.04	NA	NA	NA	NA	15112.1	16020.7	13444.1	14272.3	NA
TGME49_285230	9842.19	6878.21	7030.92	9605.23	NA	NA	NA	NA	NA	NA	NA	NA	unknown
TGME49_284050	136808	110321	98149	118311	NA	NA	NA	NA	46588.6	38529.2	41119.3	48674.2	nucleus - non-chromatin
TGME49_308890	14014.5	11560.4	6455.54	11516.5	NA	NA	NA	NA	14549	15612.6	11542.7	11795.8	unknown
TGME49_263400	12685.8	6591.57	5398.56	5356.04	10303.9	5732.22	1805.12	3843.75	NA	NA	2409.39	1042.43	unknown
TGME49_314410	21904.5	14803.5	16640.9	17940	44755.5	37238.8	33550.5	42390.9	19583.6	18544	15304.1	16223.5	nucleus - non-chromatin
TGME49_227820	28016.4	8349.45	14910.9	20352.9	NA	NA	NA	NA	NA	NA	NA	NA	unknown
TGME49_225790	83187.2	47893.6	96095.9	43592.3	108715	67169.5	53811.6	79668	94889.1	62040.8	61061.8	79610.4	tubulin cytoskeleton
TGME49_310370	21814.5	13299.1	17163.4	14410.8	16883.1	11675.8	10681.7	17839.5	13683	18001.7	13528.7	13596.9	ER
TGME49_273330	NA	NA	NA	NA	NA	NA	NA	NA	86805.7	76530.6	82444.4	78550.8	NA
TGME49_239010	NA	NA	NA	NA	4108.3	3246.36	1987.35	1755.22	1598.69	4563.7	4527.78	3463.41	dense granules
TGME49_295690	17356.5	8306.03	6972.04	7165.17	43316.5	35198.7	25469.8	32083	17348.5	20014.3	16152.7	18633.7	mitochondrion - membranes
TGME49_320620	7836.93	3884.8	3800.17	5436.76	17252.7	9268.64	9362.71	12822.5	3852.46	3125.45	5163.97	5113.86	NA
TGME49_230220	16945.6	10708.8	12006	12686.8	14596.7	7214.98	9882.06	11191.7	13226.2	11178.2	10843.8	9725.64	nucleus - chromatin
TGME49_258450	4940.78	2269.68	1007.03	1136.16	NA	NA	NA	NA	NA	NA	NA	NA	NA
TGME49_237290	1198.68	897.394	491.032	711.404	NA	NA	NA	NA	NA	NA	NA	NA	nucleus - chromatin
TGME49_323100	NA	NA	NA	NA	NA	NA	NA	NA	67047.2	43989	41225.4	37727.8	dense granules
TGME49_283720	2740.42	2277.15	4653.96	1517.76	NA	NA	NA	NA	NA	NA	NA	NA	nucleus - chromatin
TGME49_309590	5.12058e+06	4.58338e+06	3.37711e+06	2.73466e+06	5.93295e+06	4.98986e+06	5.09796e+06	4.63167e+06	3.6639e+06	2.29001e+06	1.73436e+06	2.6935e+06	unknown
TGME49_289140	NA	NA	NA	NA	NA	NA	NA	NA	62618	46683.3	44055.4	49783.5	mitochondrion - soluble
TGME49_215700	1373.35	NA	957.356	NA	NA	NA	NA	NA	NA	NA	NA	NA	unknown
TGME49_244150	NA	NA	NA	NA	NA	NA	NA	NA	64320	49092.7	63976.7	57066.2	cytosol
TGME49_295990	1700.93	1072.2	1365.89	1087.56	10159.1	8365.62	4746.09	7500.72	8829.39	5606.8	7873.04	7083.05	apicoplast
TGME49_219250	12023.6	11404	10933.8	10575.2	NA	NA	NA	NA	8488.29	9049.02	7676.91	8619.53	Golgi
TGME49_202120	54594.4	24967.1	26171.7	25117.5	NA	NA	NA	NA	1.09931e+06	1.08309e+06	706858	1.07425e+06	unknown
TGME49_257740	NA	NA	NA	NA	30084.6	28921.9	15411.4	19779.9	33897.9	24013	24069.3	25374.7	cytosol
TGME49_225125	NA	NA	NA	NA	14610.7	11893.7	9969.18	14066.8	NA	NA	NA	NA	nucleolus
TGME49_255170	28615.7	19003	15775	15382.5	NA	NA	NA	NA	NA	NA	NA	NA	NA
TGME49_254200	6083.05	3200.26	3049.4	2829.92	7966.33	6728.47	4928.56	7096.96	8755.57	5086.49	9073.39	6498.34	NA
TGME49_226030	96612	46733.4	56354.4	44782.9	130450	94542.1	84328.5	85847.9	36923.8	30732.6	16063.1	24098.1	IMC
TGME49_229340	41368.5	26292.5	22059.4	29467.6	NA	NA	NA	NA	NA	NA	NA	NA	NA
TGME49_314820	NA	NA	NA	NA	7932.65	5244.15	4969.89	6495.25	NA	NA	NA	NA	mitochondrion - membranes
TGME49_247580	NA	NA	NA	NA	41945.2	26469.3	27973.3	35089	NA	NA	NA	NA	rhoptries 2
TGME49_274000	3334.54	1718.91	1199.47	2378.4	4036.01	441.538	1268.43	1894.23	2252.77	2805.17	2032.02	3309.5	NA
TGME49_315210	69759.9	52386.9	54040.6	47920.8	47320.2	31905.4	36937	46106.9	85505.9	75566.2	53643.8	59846.1	rhoptries 2
TGME49_231350	8231.89	6581.5	5504.75	8163.68	NA	NA	NA	NA	NA	NA	NA	NA	mitochondrion - soluble
TGME49_304990	41292.9	16169.8	16657.5	18371.1	66575.3	33752.8	53678.9	44727.7	NA	NA	NA	NA	unknown
TGME49_219760	2040.2	1110.77	812.806	477.034	5704.25	1248.92	3916.89	3958.36	NA	NA	NA	NA	unknown
TGME49_314890	NA	NA	NA	NA	24062.6	19562.8	12563.1	17798.5	NA	NA	NA	NA	unknown
TGME49_289330	14155.7	10274.3	9274.92	11970.4	NA	NA	NA	NA	NA	NA	NA	NA	unknown
TGME49_219170	NA	NA	NA	NA	4685.31	2206.16	NA	654.414	NA	NA	NA	NA	IMC
TGME49_223940	NA	NA	NA	NA	NA	NA	NA	NA	143117	27569.4	17512.2	17121.7	IMC
TGME49_211450	NA	NA	NA	NA	NA	NA	NA	NA	7325.53	6738.35	7717.6	7432.1	NA
TGME49_320000	69864.3	51193	36180.2	43057.2	NA	NA	NA	NA	NA	NA	NA	NA	nucleus - chromatin
TGME49_256980	18755.2	13206.8	17190.2	15795.4	19256.2	12961.5	18929.1	15430.4	14222.5	15818	14276.1	13748.7	ER
TGME49_259230	NA	NA	NA	NA	NA	NA	NA	NA	55746.3	51515.6	56901	56214.1	apicoplast
TGME49_297492	NA	NA	NA	NA	NA	NA	NA	NA	13481.4	4701.62	7611.15	6720.1	NA
TGME49_314080	40528.6	26722.8	28063.5	26151.7	82308.6	57626.3	67221.3	61472.8	NA	NA	NA	NA	apical 1
TGME49_240690	NA	NA	NA	NA	13869.1	11374.9	11487.8	12610.5	NA	NA	NA	NA	cytosol
TGME49_304640	17521.2	10240	7778.11	12260.5	9524.57	7594.04	2540.89	6503.5	22992.1	15550.5	14279.4	18614.9	mitochondrion - membranes
TGME49_224260	NA	NA	NA	NA	968.072	1096.49	1066.74	1760.1	11695.5	8890.99	8043.43	8706.39	nucleus - chromatin
TGME49_216900	5650.59	1425.99	1045.81	3407.4	7097.06	4980.86	6640.72	5870.65	NA	NA	NA	NA	cytosol
TGME49_294550	14453.2	11520	13186.5	12991.4	21264.1	15220.8	15074	20074.5	NA	NA	NA	NA	nucleus - chromatin
TGME49_211440	NA	NA	NA	NA	11601.1	12016.4	12797.8	13118.3	NA	NA	NA	NA	apicoplast
TGME49_274110	NA	NA	NA	NA	36024.1	27782.9	18701.8	30720.4	26587.1	23950.3	32360.4	26290.2	NA
TGME49_276910	276381	186961	213015	246243	NA	NA	NA	NA	NA	NA	NA	NA	Golgi
TGME49_246050	NA	NA	NA	NA	NA	NA	NA	NA	4736.31	4259.93	3404.99	4311.99	NA
TGME49_288400	15436	9450.99	9512.12	11180.8	14551.1	8803.08	5081.83	7036.26	NA	NA	NA	NA	mitochondrion - membranes
TGME49_318230	NA	NA	NA	NA	NA	NA	NA	NA	27626.4	33455.2	25895.4	24996.3	cytosol
TGME49_205010	NA	NA	NA	NA	42391	32696.3	24023.5	38517.7	NA	NA	NA	NA	nucleus - non-chromatin
TGME49_255510	51866.3	39703.8	38225.5	42292.6	NA	NA	NA	NA	NA	NA	NA	NA	NA
TGME49_281650	14176.6	3817.11	3160.65	3497.94	NA	NA	NA	NA	NA	NA	NA	NA	NA
TGME49_273730	326113	312804	240001	254071	215437	173559	94554.7	158143	326221	304660	338822	297074	apicoplast
TGME49_294860	NA	NA	NA	352.554	NA	NA	NA	NA	NA	NA	NA	NA	NA
TGME49_246720	NA	NA	NA	NA	82382.6	55440.7	59250.8	58243	NA	NA	NA	NA	apical 2
TGME49_245610	43380.9	37079.2	40957.1	26835.1	122776	96283.6	84251.9	96206.8	58469.6	57095.2	48455.6	54339.1	unknown
TGME49_239752	NA	NA	NA	NA	1308.26	1905.11	1402.9	3668.75	NA	NA	NA	NA	unknown
TGME49_262810	15099.4	7652.05	8087.19	7532.05	NA	NA	NA	NA	NA	NA	NA	NA	mitochondrion - soluble
TGME49_270830	10075.7	6802.87	6664.75	10715.6	NA	NA	NA	NA	NA	NA	NA	NA	nucleus - non-chromatin
TGME49_268950	43500.6	26299.8	24870.5	23613.9	46463.5	40264.6	40253.8	39024.3	NA	NA	NA	NA	cytosol
TGME49_319540	NA	NA	NA	NA	9141.84	7595.42	6830.99	10338.1	13904.9	10797.7	9360.29	7975.6	mitochondrion - soluble
TGME49_302055	80606.5	60286.1	62644.5	81780.7	NA	NA	NA	NA	74371.3	76861.8	83006.6	69826.7	unknown
TGME49_312622	46654.2	21640.5	31437.8	30082.1	57581.7	39402.4	44831.2	42460.2	39618.9	42463.4	36390.2	39101.2	IMC
TGME49_249870	42651.7	24761.8	9070.06	27970.1	NA	NA	NA	NA	NA	NA	NA	NA	nucleus - chromatin
TGME49_308920	NA	NA	NA	NA	NA	NA	NA	NA	19608.8	14915.4	14052.6	13710	nucleus - non-chromatin
TGME49_214490	5355.48	3130.94	3811.18	4219.09	NA	NA	NA	NA	NA	NA	NA	NA	cytosol
TGME49_202960	41361.4	20818.3	22990.7	23509	NA	NA	NA	NA	42538.9	34286.2	22406.2	29889.9	mitochondrion - soluble
TGME49_203370	13587.5	8945.41	8902.47	10507	20319.1	13767.6	17457.6	13848.5	NA	NA	NA	NA	nucleus - non-chromatin
TGME49_229480	NA	NA	NA	NA	21104.1	18307.2	22782.5	18729.4	NA	NA	NA	NA	ER 2
TGME49_209540	NA	NA	NA	NA	9018.86	6005.15	6585.68	6779.2	NA	NA	NA	NA	NA
TGME49_253740	NA	NA	NA	NA	NA	NA	NA	NA	17274	11174.9	10221.6	12963.8	NA
TGME49_216010	NA	NA	NA	NA	61760.7	60718.6	53059.9	37439.3	158249	112601	97530.1	122527	mitochondrion - soluble
TGME49_229260	NA	NA	NA	514.03	NA	NA	NA	NA	NA	NA	NA	NA	NA
TGME49_269900	NA	NA	NA	NA	23253.9	20936	20622.4	18767.4	22309.3	19331.9	12909.4	12158.9	nucleus - non-chromatin
TGME49_226060	13074.3	6738.7	8226.61	11603.6	14092.6	10798.5	11025.7	10724.1	18649	12020.5	12406	12455.8	unknown
TGME49_243710	NA	NA	NA	NA	NA	NA	NA	NA	20610.6	27537.7	17111.4	21066	cytosol
TGME49_311310	167321	105921	205909	120233	NA	NA	NA	NA	72702.9	51792.5	59996.7	55777.6	cytosol
TGME49_304910	100667	76418.9	60919	70816	50070.9	34704.3	26297.5	44947.1	NA	NA	NA	NA	NA
TGME49_203600	14025.4	10943	12555.8	10746.9	12577.3	13590.5	10945.6	16764.8	NA	NA	NA	NA	dense granules
TGME49_247770	NA	NA	NA	NA	29642.5	19299.7	11634.2	22625.6	NA	NA	NA	NA	mitochondrion - membranes
TGME49_220360	NA	NA	NA	NA	16248.6	7649.6	13002	16928.7	7976.96	6037.69	4679.57	5432.12	unknown
TGME49_310010	NA	NA	NA	NA	NA	NA	NA	NA	17357.3	14925.2	15710.4	21851.8	rhoptries 1
TGME49_233130	12869.8	6100.05	8561.41	9847.93	NA	NA	NA	NA	NA	NA	NA	NA	PM - integral
TGME49_240380	NA	NA	NA	NA	NA	NA	NA	NA	7156.88	3278.94	4786.72	2757.67	unknown
TGME49_290460	NA	NA	NA	NA	NA	NA	NA	NA	3601.53	9839.96	7553.31	2712.81	mitochondrion - soluble
TGME49_207460	36680.5	36034	40936.5	46602.5	36581.6	17855.2	11625	23268.3	NA	NA	NA	NA	unknown
TGME49_236190	NA	NA	NA	NA	32163.7	27247.1	23208.5	30102.6	28310.6	21978.1	29194.9	24335	NA
TGME49_244140	53648.5	60073	41597.2	43983.2	73978.9	56398.7	47005.9	85414.5	55994.8	54827.4	61718	59802.9	NA
TGME49_295710	NA	NA	NA	NA	NA	NA	NA	NA	7228.85	1395.06	2584.45	1241.12	cytosol
TGME49_233860	NA	NA	NA	NA	NA	NA	NA	NA	23226.1	21226.3	23119.3	23637.6	apicoplast
TGME49_229210	NA	NA	NA	NA	NA	NA	NA	NA	8485.64	8396.93	4120.38	6244.35	nucleus - non-chromatin
TGME49_209200	19127.6	6457.21	7320.48	6869.62	16139.4	6325.07	7479.62	5345.98	NA	NA	NA	NA	NA
TGME49_244690	38277.8	24461.9	21162.6	20223.5	59584.9	38482.5	36756.2	38043.8	40059.6	36161.9	37671.8	33134.6	cytosol
TGME49_290890	NA	NA	NA	NA	NA	NA	NA	NA	30449.1	20245.4	11270.4	16744.2	cytosol
TGME49_311770	830.544	NA	963.477	1010.89	NA	NA	NA	NA	NA	NA	NA	NA	NA
TGME49_255890	NA	NA	NA	NA	NA	NA	NA	NA	694.009	619.498	811.401	1030.34	cytosol
TGME49_265180	10460.2	10004.4	11461.7	9676.11	12404.1	10251.4	14633.1	12568.1	19946.3	11507.7	15927.5	15087.3	unknown
TGME49_236510	2029.71	1820.15	3207.22	2929.15	NA	NA	NA	NA	1204.88	1688.58	975.06	1422.91	mitochondrion - membranes
TGME49_310200	NA	NA	NA	NA	NA	NA	NA	NA	8532.79	10724.7	6254.82	10105.3	NA
TGME49_273410	NA	NA	NA	NA	NA	NA	NA	NA	2036.55	3267.74	2605.13	1644.4	unknown
TGME49_253750	888.562	NA	904.16	953.675	NA	NA	NA	NA	NA	NA	NA	NA	nucleus - chromatin
TGME49_201380	22568.8	14095.9	6439.33	16265.4	NA	NA	NA	NA	NA	NA	NA	NA	unknown
TGME49_208090	NA	NA	NA	NA	6432.46	5325.85	715.722	1614.5	NA	NA	NA	NA	NA
TGME49_257150	10028.1	5421.04	4569.2	4960.94	NA	NA	NA	NA	NA	NA	NA	NA	unknown
TGME49_219485	NA	NA	NA	NA	NA	NA	NA	NA	7097.16	4711.73	5029.81	5814.08	NA
TGME49_207430	NA	NA	NA	NA	NA	NA	NA	NA	7990.54	12400.4	11073.5	8438.06	unknown
TGME49_305450	NA	NA	NA	NA	6229.43	5626.38	6006.03	4269.5	NA	NA	NA	NA	ER
TGME49_236970	8067.76	3447.99	5036.04	5048.93	7956.27	5281.55	6132.56	8523.83	NA	NA	NA	NA	nucleus - chromatin
TGME49_268210	4888.41	1642.91	2688.49	4527.66	NA	NA	NA	NA	7729.24	8073.14	8291.06	7381.29	NA
TGME49_202640	NA	NA	NA	NA	NA	NA	NA	NA	15027.2	10501	13659.6	10431.6	NA
TGME49_285660	NA	NA	NA	NA	NA	NA	NA	NA	13933.9	14737.1	15488.1	14374.8	nucleus - chromatin
TGME49_252630	NA	NA	NA	NA	NA	NA	NA	NA	3565.13	4004.68	5378.19	4140.78	mitochondrion - membranes
TGME49_297890	NA	NA	NA	NA	5247.16	1162.84	1256.67	1317.73	4279.38	3968.89	2691.43	2602.25	mitochondrion - soluble
TGME49_229920	147988	84552.2	69141.1	87405.9	206856	124310	101550	145004	NA	NA	NA	NA	mitochondrion - membranes
TGME49_312220	66361.1	43410.7	45748.2	43560.5	85703.7	59568.3	61965.5	64358.6	41921.5	34279.6	29054.3	34154.6	mitochondrion - membranes
TGME49_321440	NA	NA	NA	NA	NA	NA	NA	NA	6375.77	4845.4	11684.8	11063.3	nucleus - chromatin
TGME49_213060	4283.63	993.832	1463.86	2244.88	10830.5	7533.51	11025.5	7363.78	NA	NA	NA	NA	unknown
TGME49_255470	NA	NA	NA	NA	25539.6	15813.8	7431.73	16598.3	NA	NA	NA	NA	NA
TGME49_203060	NA	NA	NA	NA	NA	NA	NA	NA	109006	85914.3	86068.7	102497	NA
TGME49_268870	NA	NA	NA	NA	11257	9473.4	11559.1	13026.5	13022.2	11470.6	16583.3	12218.6	cytosol
TGME49_226660	NA	NA	NA	NA	NA	NA	NA	NA	8591.83	6862.09	5260.47	7941.19	unknown
TGME49_267570	NA	NA	NA	NA	NA	NA	NA	NA	8401.25	7011.95	5866.06	7098.23	NA
TGME49_287220	3700.83	1082.37	1088.82	2358.83	5986.06	3989.71	4188.46	3873.13	NA	NA	NA	NA	NA
TGME49_294790	NA	NA	NA	NA	14975.9	11295	8440.39	8980.26	NA	NA	NA	NA	rhoptries 2
TGME49_320588	NA	NA	NA	NA	NA	NA	NA	NA	2141.09	1650.04	2599.66	1566.53	apicoplast
TGME49_235880	86524.3	55312.1	68159.2	58501.7	NA	NA	NA	NA	30440.4	24122.3	26891.9	25061.7	mitochondrion - membranes
TGME49_239800	61670.3	42215.8	49663.6	44006	NA	NA	NA	NA	NA	NA	NA	NA	IMC
TGME49_222900	48050.8	38305.5	30661.9	35846.8	NA	NA	NA	NA	NA	NA	NA	NA	unknown
TGME49_313410	NA	NA	NA	NA	26293.5	15455.8	14392.9	18514.1	NA	NA	NA	NA	19S proteasome
TGME49_283890	NA	NA	NA	NA	1745.96	1565.81	964.036	1541.77	NA	NA	NA	NA	NA
TGME49_207720	23044.6	13377.9	13931.8	13946.3	17585.8	13933.1	13537.3	15026.6	NA	NA	NA	NA	nucleolus
TGME49_239610	NA	NA	NA	NA	42758.4	33798	17603.7	36019.4	NA	NA	NA	NA	mitochondrion - membranes
TGME49_237220	6034.07	4360.47	4690.86	3534.39	11672.8	6729.11	7746.33	13443.1	NA	NA	NA	NA	unknown
TGME49_265530	3949.08	1423.94	1450.73	1694.64	NA	NA	NA	NA	NA	NA	NA	NA	nucleus - non-chromatin
TGME49_264950	NA	NA	NA	NA	2321.56	1308.84	1282.57	1820.89	NA	NA	NA	NA	cytosol
TGME49_244440	21717.4	13899.5	14429.5	14896.6	NA	NA	NA	NA	16535.2	11414.4	8035.19	10458.4	PM - integral
TGME49_254365	NA	NA	NA	NA	158233	104864	120711	124952	112658	95812.3	90539.1	105536	PM - integral
TGME49_312270	81093.1	49910.2	51130.5	41151.5	NA	NA	NA	NA	NA	NA	NA	NA	rhoptries 1
TGME49_238950	NA	NA	NA	NA	100695	87232.6	103940	90080.1	45613.9	39854.3	39011.1	35990.1	ER
TGME49_212300	NA	NA	NA	NA	NA	NA	NA	NA	3435.84	2377.9	1715.97	4149.05	dense granules
TGME49_267430	NA	NA	NA	NA	30515.9	18629	19387.7	27842.4	26680.8	27542.1	22579.4	25336.6	ER
TGME49_232440	13194.2	7119.83	7475.13	6456.13	16358.3	12900.2	11853.3	15527.3	12475.5	11263.9	9048.67	10225.4	nucleus - chromatin
TGME49_267620	5003.88	5460.36	3704.56	4050.97	NA	NA	NA	NA	NA	NA	NA	NA	IMC
TGME49_205040	NA	NA	NA	NA	NA	NA	NA	NA	1326.01	996.632	733.436	1094.15	ER
TGME49_294770	23148.7	16185.8	12514.7	16317.4	NA	NA	NA	NA	14575.1	15510.4	13488.6	14051.4	nucleus - chromatin
TGME49_300618	NA	NA	NA	NA	NA	NA	NA	NA	160872	124348	104751	116788	NA
TGME49_259720	10589.1	6734.09	8058.77	7014.26	NA	NA	NA	NA	NA	NA	NA	NA	unknown
TGME49_306600	NA	NA	NA	NA	12803.8	9962.22	16551.7	14473.4	18997.1	13336	9879.18	10086.7	nucleus - non-chromatin
TGME49_254110	NA	NA	NA	NA	NA	NA	NA	NA	33752.4	23166.2	29477.5	25954.3	apicoplast
TGME49_231890	NA	NA	NA	NA	54838.3	42625	35054.5	46869.8	52486.5	45274.9	60310.4	57069.9	apicoplast
TGME49_246950	1007.66	NA	481.798	463.509	NA	NA	NA	NA	NA	NA	NA	NA	apical 1
TGME49_267560	NA	NA	NA	NA	170460	112986	83124.7	128995	NA	NA	NA	NA	mitochondrion - soluble
TGME49_239720	17000.8	5098.31	3834.96	10300.8	NA	NA	NA	NA	NA	NA	NA	NA	NA
TGME49_232250	12603.4	6874.45	7768.87	4887.1	NA	NA	NA	NA	15038.9	12242.8	13392.8	10522.6	cytosol
TGME49_244880	NA	614.71	667.365	488.937	NA	NA	NA	NA	NA	NA	NA	NA	nucleus - non-chromatin
TGME49_242830	NA	934.4	NA	NA	1362.94	NA	753.509	NA	NA	NA	NA	NA	unknown
TGME49_219620	NA	NA	NA	NA	1177.45	745.767	953.797	NA	NA	NA	456.282	NA	NA
TGME49_223270	NA	NA	NA	NA	NA	NA	NA	NA	126916	81223.7	80665.5	92934.4	mitochondrion - soluble
TGME49_229390	NA	NA	NA	NA	886.487	850.44	1053.7	NA	NA	645.514	NA	NA	unknown
TGME49_263510	NA	NA	NA	NA	3993.7	4702.4	3456.4	4337	NA	NA	NA	NA	NA
TGME49_203910	6352.37	1761.27	3650.46	4686.12	NA	NA	NA	NA	NA	NA	NA	NA	unknown
TGME49_280490	NA	NA	NA	NA	NA	NA	NA	NA	33838.1	31413.9	31740.4	31603.2	unknown
TGME49_254370	20774.6	7758.58	6391.79	7831.63	NA	NA	NA	NA	NA	NA	NA	NA	unknown
TGME49_207450	NA	NA	NA	NA	NA	NA	NA	NA	18599.7	20161	20359.9	12731.7	unknown
TGME49_312390	NA	NA	NA	NA	NA	NA	NA	NA	2361.88	3144.42	2908.72	2153.99	mitochondrion - soluble
TGME49_267590	NA	NA	NA	NA	11172.8	11102.9	7178.79	9416.93	11538.9	10132	9983.27	10364	ER
TGME49_300612	NA	NA	NA	NA	119324	131725	103404	115153	NA	NA	NA	NA	NA
TGME49_298030	36869.6	27002.3	25105.4	25641.2	60417.6	41379.5	38754	42638.4	33151.3	25693.4	23720.5	32660.9	mitochondrion - membranes
TGME49_259830	24491.6	23168	28917.8	22995.2	NA	NA	NA	NA	NA	NA	NA	NA	dense granules
TGME49_309810	NA	NA	NA	NA	10526	8029.45	8481.64	6273.42	NA	NA	NA	NA	40S ribosome
TGME49_319300	1853.8	681.813	890.392	1042.39	NA	NA	NA	NA	2004.68	NA	804.711	1444.13	ER
TGME49_241880	NA	NA	NA	NA	NA	NA	NA	NA	31307.6	13783.9	12778.9	9641.95	unknown
TGME49_248110	27007.5	19225.1	15690.7	21417.7	NA	NA	NA	NA	NA	NA	NA	NA	unknown
TGME49_220480	9378.21	6830.56	6346.8	7319.25	NA	NA	NA	NA	NA	NA	NA	NA	NA
TGME49_309370	3998.26	1739.39	2501.17	2649.65	NA	NA	NA	NA	NA	NA	NA	NA	nucleus - chromatin
TGME49_277240	26481.4	23301.9	16841.9	32485.1	NA	NA	NA	NA	NA	NA	NA	NA	dense granules
TGME49_320600	11041.2	NA	NA	11544.2	NA	NA	NA	NA	NA	NA	NA	NA	nucleus - non-chromatin
TGME49_252430	50143.1	31624.5	35792.9	31434.2	NA	NA	NA	NA	NA	NA	NA	NA	PM - peripheral 2
TGME49_255895	26153.3	10812.2	8289.94	10056	NA	NA	NA	NA	NA	NA	NA	NA	apical 1
TGME49_272390	3875	2998.26	25887.8	2478.32	5902.91	4139.34	20100.6	8782.89	NA	NA	NA	NA	apicoplast
TGME49_258970	2153.06	1065.6	1662.15	2784.6	NA	NA	NA	NA	NA	NA	NA	NA	unknown
TGME49_233680	4437.51	3419.97	2771.44	4310.82	NA	NA	NA	NA	NA	NA	NA	NA	cytosol
TGME49_286470	NA	NA	NA	NA	98839.2	66556.8	67245.8	68882.7	NA	NA	NA	NA	NA
TGME49_214610	8265.5	8847.54	8615.17	10673.2	16094.4	10004.7	8762.77	15503.2	9669.07	8380.03	8368.39	10811.3	nucleus - chromatin
TGME49_268380	6179	1795.06	4104.46	2876.14	NA	NA	NA	NA	NA	NA	NA	NA	NA
TGME49_214790	135656	87913.2	72909	84074.3	NA	NA	NA	NA	161812	165935	107644	130163	mitochondrion - soluble
TGME49_272490	49891.8	39773.6	29695.3	41131.7	88122.9	44461.5	42248.7	61835.9	NA	NA	NA	NA	mitochondrion - membranes
TGME49_273840	NA	NA	NA	NA	16541.2	11670.7	13465.9	15289.1	7938.62	7248.7	7063.11	6839.8	nucleus - non-chromatin
TGME49_242460	NA	NA	NA	NA	NA	NA	NA	NA	16760.6	13679.1	10002	11792.4	mitochondrion - membranes
TGME49_221170	98910.4	76728.2	93784.9	82251.2	NA	NA	NA	NA	NA	NA	NA	NA	unknown
TGME49_200450	23696.2	7387.76	26893.3	12271.5	NA	NA	NA	NA	NA	NA	NA	NA	NA
TGME49_316570	6667.2	3040.88	3838.8	5401.49	NA	NA	NA	NA	NA	NA	NA	NA	unknown
TGME49_311905	NA	NA	NA	NA	1112.31	999.879	692.796	792.577	1065.71	753.322	764.937	NA	unknown
TGME49_202470	NA	NA	NA	NA	42787.5	29662.4	28915.6	37296.3	NA	NA	NA	NA	nucleus - non-chromatin
TGME49_253360	NA	NA	NA	NA	166754	39519.8	31749.7	46556.1	NA	NA	NA	NA	PM - integral
TGME49_294700	4019.49	2889.87	3072.95	3509.14	NA	NA	NA	NA	NA	NA	NA	NA	nucleus - non-chromatin
TGME49_203420	NA	NA	NA	NA	NA	NA	NA	NA	16861.3	14699.6	7839.84	13120	unknown
TGME49_312200	7755.31	3117.68	5118.4	5298.08	10290	7352.77	5790.15	7829.79	NA	NA	NA	NA	cytosol
TGME49_231210	NA	NA	NA	NA	137599	63662	64537.3	62886.9	NA	NA	NA	NA	unknown
TGME49_278170	79941.5	53008.8	54924.4	58017.2	123817	93065.9	75669.3	90003.3	NA	NA	NA	NA	NA
TGME49_314430	101834	86104.3	63835.8	72625.1	NA	NA	NA	NA	NA	NA	NA	NA	unknown
TGME49_205220	NA	NA	NA	NA	30208.9	22130.7	17202.2	20504	NA	NA	NA	NA	nucleus - non-chromatin
TGME49_252340	12083.2	3022.27	6477.4	8902.33	NA	NA	NA	NA	NA	NA	NA	NA	ER
TGME49_310900	NA	NA	NA	NA	NA	NA	NA	NA	3941.18	3161.7	1278.28	2972.75	nucleus - chromatin
TGME49_310210	NA	NA	NA	NA	26988.7	20667.1	24343.1	25419.1	NA	NA	NA	NA	endomembrane vesicles
TGME49_229900	NA	NA	NA	NA	NA	NA	NA	NA	61730.9	43668	35252.9	48158.2	mitochondrion - soluble
TGME49_232620	NA	NA	NA	NA	NA	NA	NA	NA	6659.27	5743.07	4645.66	3671.69	nucleus - chromatin
TGME49_229790	NA	579.223	NA	1032.03	NA	NA	NA	NA	NA	NA	NA	NA	nucleus - chromatin
TGME49_254160	13621.6	7424.91	1878.53	NA	27528.6	NA	NA	13305.3	32721.5	18762.3	3540.65	7997.21	NA
TGME49_217050	17077.7	13093.6	11324.8	13643.9	20182.7	13794.4	18044.6	20806.2	NA	NA	NA	NA	nucleus - chromatin
TGME49_258630	NA	NA	NA	NA	6562.64	4491.48	14566	9472.39	NA	NA	NA	NA	mitochondrion - soluble
TGME49_294780	NA	NA	NA	NA	1033.66	989.415	891.834	1311.68	NA	NA	NA	NA	nucleus - non-chromatin
TGME49_211700	813548	39757.7	75829.2	22566.8	NA	NA	NA	NA	NA	NA	NA	NA	unknown
TGME49_215430	41898.7	25094	33150.5	27057	38309	43120.3	40903.3	47503.8	53809.5	38052.7	45489.2	45798.8	mitochondrion - membranes
TGME49_315930	NA	NA	NA	NA	12891.5	11270.4	9767.96	10506.5	15697.2	15600.8	9368.83	14476.7	mitochondrion - membranes
TGME49_258150	17074.9	9131.06	10465.5	10407	NA	NA	NA	NA	23769.6	9835.46	9284.23	9012.28	20S proteasome
TGME49_291950	NA	NA	NA	NA	15935.8	11264.4	9249.51	12212.3	NA	NA	NA	NA	unknown
TGME49_249215	NA	NA	NA	NA	4976.32	1162.06	2927.66	3737.27	6325.64	5784.44	5226.47	4683.66	NA
TGME49_268400	7979.29	6490.35	4218.95	5470.64	NA	NA	NA	NA	15825.7	12614.7	14684.7	13581.1	NA
TGME49_240060	18093.5	15507.4	10110.2	15350.8	23772.4	24484.4	11628.6	15827.2	14680.1	18862.8	10520.3	16936.3	dense granules
TGME49_298020	48204.3	31654.7	34824.6	34983.9	NA	NA	NA	NA	NA	NA	NA	NA	unknown
TGME49_250340	33916.9	19764.7	15502.6	15995.5	NA	NA	NA	NA	NA	NA	NA	NA	apical 2
TGME49_214180	NA	NA	NA	NA	3192.8	3438.16	2012.08	2272.55	NA	NA	NA	NA	nucleus - chromatin
TGME49_228350	9836.36	8884.39	7493.28	8767.32	22505.4	20055	13117.3	23592.1	14078.1	12498.8	16725.8	14508.8	NA
TGME49_238250	34517.7	22133.4	30029.9	21150.6	196679	142162	171785	143354	NA	NA	NA	NA	60S ribosome
TGME49_201260	NA	NA	NA	NA	17686.6	20374.6	23545.4	16494.9	NA	NA	NA	NA	PM - integral
TGME49_314530	4766.34	3052.19	1225.55	3410.25	NA	NA	NA	NA	NA	NA	NA	NA	unknown
TGME49_240980	NA	NA	NA	NA	5370.89	3365.6	4154.75	4778.3	12274.8	9196.69	7817.97	9426.6	cytosol
TGME49_246630	NA	NA	NA	NA	13227	12939.4	11819.6	8745.39	9980.13	10373.2	8454.06	8827.95	nucleus - non-chromatin
TGME49_288990	NA	NA	NA	NA	67323.9	43053.4	30566.3	57548.6	NA	NA	NA	NA	mitochondrion - soluble
TGME49_261380	NA	NA	NA	NA	155108	103017	91378.2	121962	116127	87077.6	114480	117042	NA
TGME49_223540	NA	NA	NA	NA	NA	NA	NA	NA	32666.5	14969	16976.8	13588.7	cytosol
TGME49_277530	NA	NA	NA	NA	NA	NA	NA	NA	15304.7	14247.3	19741.8	15008.4	NA
TGME49_262450	NA	NA	NA	NA	NA	NA	NA	NA	21551.8	14747	17251	16784	nucleus - chromatin
TGME49_263530	106705	94054.6	75263.5	87921.9	161836	88524.9	58952.5	135613	157389	135345	87967.9	152302	mitochondrion - soluble
TGME49_222360	NA	NA	NA	NA	23220.6	17311.8	23338.5	22065.8	NA	NA	NA	NA	ER
TGME49_286450	NA	NA	NA	NA	108191	102163	60099.4	71578.6	NA	NA	NA	NA	dense granules
TGME49_238390	2046.95	3220.04	2959.08	4656.33	6417.12	4685.57	4836.92	4793.88	4283.57	2829.02	2579.65	3277.05	unknown
TGME49_257680	5073.66	NA	NA	2978.85	NA	NA	NA	NA	NA	NA	NA	NA	IMC
TGME49_233470	NA	NA	NA	NA	NA	NA	NA	NA	4079.02	3327.83	2802.87	9893.48	NA
TGME49_214290	NA	NA	NA	NA	NA	NA	NA	NA	18108	27801.1	15346.3	19844.7	cytosol
TGME49_220240	66224.5	30075.3	41036.5	37378.9	NA	NA	NA	NA	NA	NA	NA	NA	dense granules
TGME49_290980	NA	NA	NA	NA	32997.5	18638	26413.1	19938.4	NA	NA	NA	NA	ER
TGME49_263320	43325.1	28245.3	23664.2	25579.6	84897.2	66138	38930.2	62066.6	NA	NA	NA	NA	nucleus - non-chromatin
TGME49_314460	NA	NA	NA	NA	NA	NA	NA	NA	3656.7	1382.52	1320.64	3174.31	apicoplast
TGME49_279320	5340.47	1688.43	1103.72	3556.35	NA	NA	NA	NA	NA	NA	NA	NA	unknown
TGME49_288840	NA	NA	NA	NA	NA	NA	NA	NA	23118.1	23067.3	17317.6	17743	dense granules
TGME49_225940	101936	58952.1	78623.8	63389.9	NA	NA	NA	NA	NA	NA	NA	NA	IMC
TGME49_319640	NA	NA	NA	NA	NA	NA	NA	967.777	NA	NA	NA	NA	unknown
TGME49_225200	NA	NA	NA	NA	NA	NA	NA	NA	21606.4	19491.2	9171.25	11676.7	rhoptries 1
TGME49_240510	38551.5	24645.4	31119.6	26447.1	NA	NA	NA	NA	43359.3	37811.7	38813.7	34489	unknown
TGME49_226840	NA	NA	NA	NA	53478.9	34310.3	30132.4	37568.6	NA	NA	NA	NA	unknown
TGME49_313690	NA	NA	NA	NA	9994.3	5576.31	7631.45	9585.95	NA	NA	NA	NA	apicoplast
TGME49_218850	NA	NA	NA	NA	179729	149163	134278	171933	104445	89964.1	101267	97154.6	NA
TGME49_214350	59044.1	39906.2	38946.9	42134	NA	NA	NA	NA	NA	NA	NA	NA	cytosol
TGME49_263200	NA	NA	NA	NA	NA	NA	NA	NA	44014.1	15426.5	13564.4	13034.3	unknown
TGME49_315770	15733	13854.6	14642.4	15900.8	NA	NA	NA	NA	NA	NA	NA	NA	mitochondrion - membranes
TGME49_291820	NA	NA	NA	NA	18860.9	14468	15205.7	15279	NA	NA	NA	NA	unknown
TGME49_302057	181383	180907	137064	170118	222639	208573	158868	218821	153629	147117	180115	157911	NA
TGME49_313870	93475.7	68745.6	75373.1	72978.8	NA	NA	NA	NA	NA	NA	NA	NA	NA
TGME49_205570	NA	NA	NA	NA	NA	NA	NA	NA	17673	18911	14196.3	19113.9	mitochondrion - membranes
TGME49_272550	NA	NA	NA	NA	7395.31	8164.1	10998.3	12200.3	NA	NA	NA	NA	unknown
TGME49_290640	NA	NA	NA	NA	NA	NA	NA	NA	122862	102613	116085	101130	unknown
TGME49_304680	NA	NA	NA	NA	10618.1	9967.79	8852.33	10034.8	NA	NA	NA	NA	unknown
TGME49_230570	NA	NA	NA	NA	8903.1	6102.01	8390.82	6530.18	NA	NA	NA	NA	Golgi
TGME49_263840	193247	116023	96871.3	205136	NA	NA	NA	NA	NA	NA	NA	NA	mitochondrion - soluble
TGME49_300606	53571.9	50844.1	40874.6	43148.8	NA	NA	NA	NA	NA	NA	NA	NA	NA
TGME49_214240	7908.81	5048.79	3277.34	4131.54	NA	NA	NA	NA	NA	NA	NA	NA	unknown
TGME49_308970	NA	NA	NA	NA	27777.1	21509.3	13363.4	26532.5	NA	NA	NA	NA	dense granules
TGME49_306640	59470.7	7353.5	7351.01	5357	NA	NA	NA	NA	NA	NA	NA	NA	PM - integral
TGME49_243480	24579	25175.7	20158	21277.4	52533.7	53700.1	41865.5	67482.1	50656.2	56439.6	69117.4	58582.5	NA
TGME49_236160	NA	NA	NA	NA	NA	NA	NA	NA	43904.6	31016.9	25283	28208.5	mitochondrion - membranes
TGME49_297470	NA	NA	NA	NA	137623	82135.7	81006	68641.6	NA	NA	NA	NA	PM - peripheral 1
TGME49_232280	335514	247261	317678	281408	NA	NA	NA	NA	NA	NA	NA	NA	PM - peripheral 1
TGME49_236620	NA	NA	NA	NA	NA	NA	NA	NA	6219	3722.65	4357.04	4629.01	nucleus - chromatin
TGME49_249670	NA	NA	NA	NA	NA	NA	NA	NA	94978	115579	114066	138997	endomembrane vesicles
TGME49_311880	NA	NA	NA	NA	12075	8302.85	7947.43	8080.67	NA	NA	NA	NA	NA
TGME49_264140	4912.84	3292.43	3667.79	3796.76	NA	NA	NA	NA	NA	NA	NA	NA	nucleus - chromatin
TGME49_319090	NA	NA	NA	NA	22237.9	8870.31	3805.48	13146.2	NA	NA	NA	NA	micronemes
TGME49_248890	40896.5	28553.1	27243.6	33541.2	NA	NA	NA	NA	NA	NA	NA	NA	nucleus - chromatin
TGME49_211230	NA	NA	NA	NA	NA	NA	NA	NA	11122.2	17325.5	21197.7	17133.6	nucleus - chromatin
TGME49_242660	NA	NA	NA	NA	NA	NA	NA	NA	53979.8	58234.6	57370.3	47721.1	unknown
TGME49_262520	NA	NA	NA	NA	28675	24194.2	19302.3	26177.3	NA	NA	NA	NA	unknown
TGME49_234270	NA	NA	NA	NA	NA	NA	NA	NA	23189.1	17373.1	10828.2	20168	apical 2
TGME49_259880	NA	NA	NA	NA	15829.2	6444.24	3242.29	8749.45	NA	NA	NA	NA	cytosol
TGME49_219430	NA	NA	NA	NA	NA	NA	NA	NA	25365.3	23712.9	30434.5	29767.3	unknown
TGME49_240590	68198	36718.6	41152.2	42851.6	NA	NA	NA	NA	99952.6	91080.7	82811.7	93026	40S ribosome
TGME49_291000	NA	NA	NA	NA	NA	NA	NA	NA	153529	145028	124183	115330	nucleus - chromatin
TGME49_246580	9205.58	NA	2372.85	3079.71	NA	NA	NA	NA	NA	NA	NA	NA	ER
TGME49_261480	374903	235750	252906	266374	NA	NA	NA	NA	NA	NA	NA	NA	ER
TGME49_232050	NA	NA	NA	NA	1657.82	895.278	784.466	NA	NA	NA	NA	NA	ER
TGME49_231360	NA	NA	NA	NA	40885.6	38292.3	22429.9	26204.4	33671.1	22144.2	35217.1	28661.7	NA
TGME49_269770	NA	NA	NA	NA	16597.1	9990.06	11340.6	11535.7	NA	NA	NA	NA	nucleolus
TGME49_204040	6134.06	3195.51	2960.5	3986.13	NA	NA	NA	NA	NA	NA	NA	NA	NA
TGME49_309960	NA	NA	NA	NA	11469.5	7578.65	8081.86	11008.3	NA	NA	NA	NA	nucleus - non-chromatin
